# Supplementary material
Source: PubMed Central journal article supplement (PMC1895974)

# *Anabaena variabilis* ATCC 29413

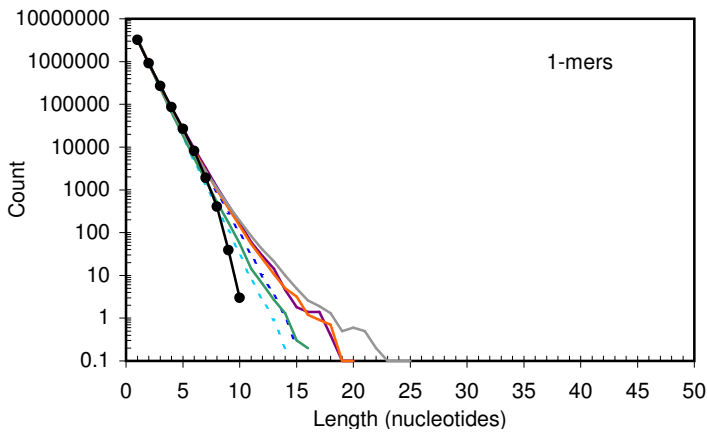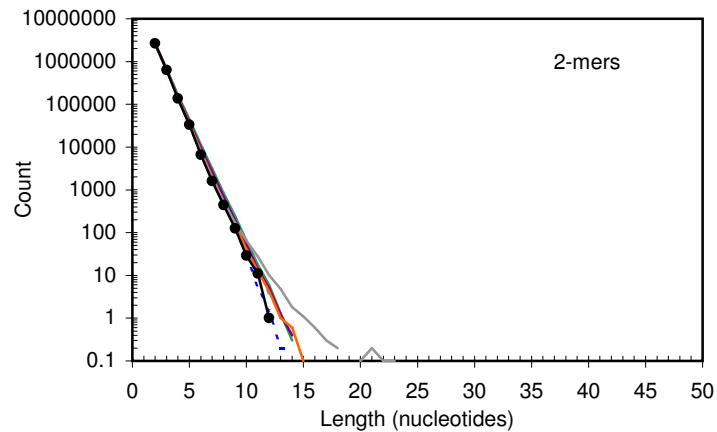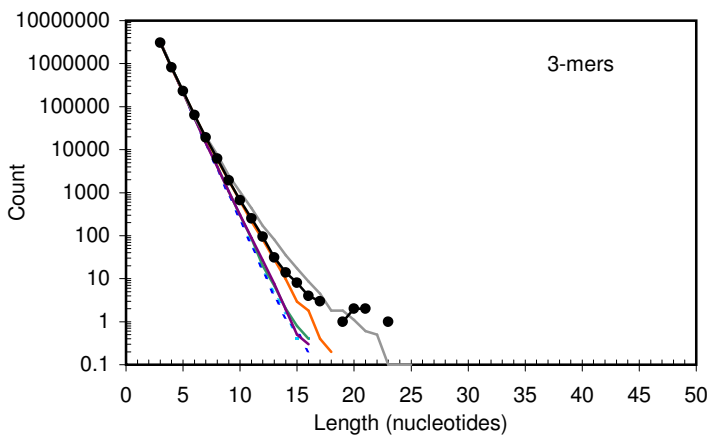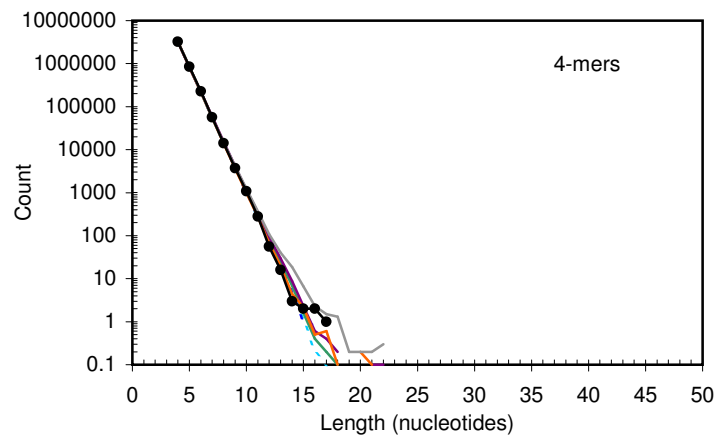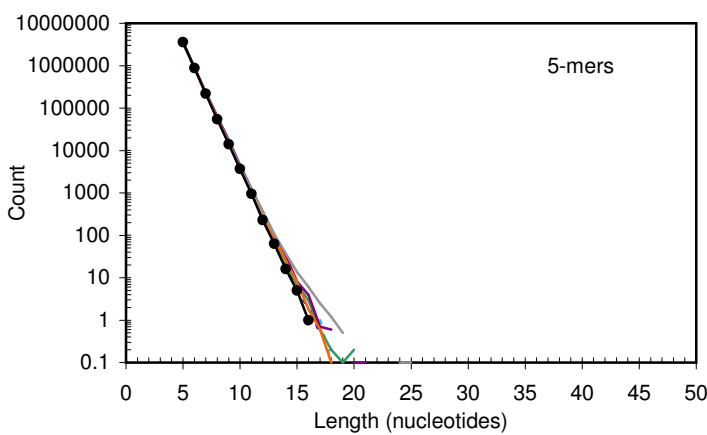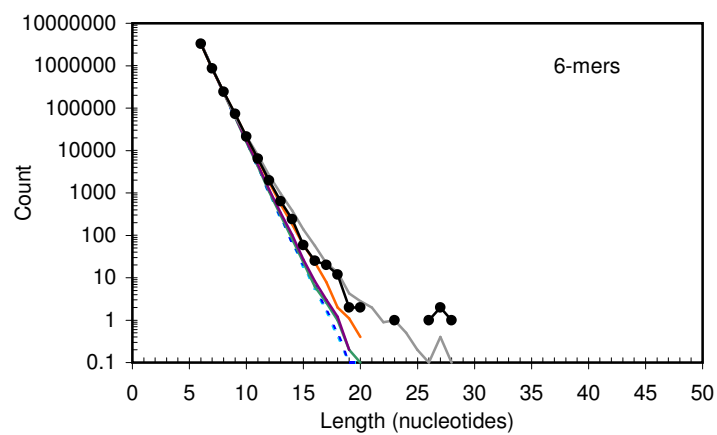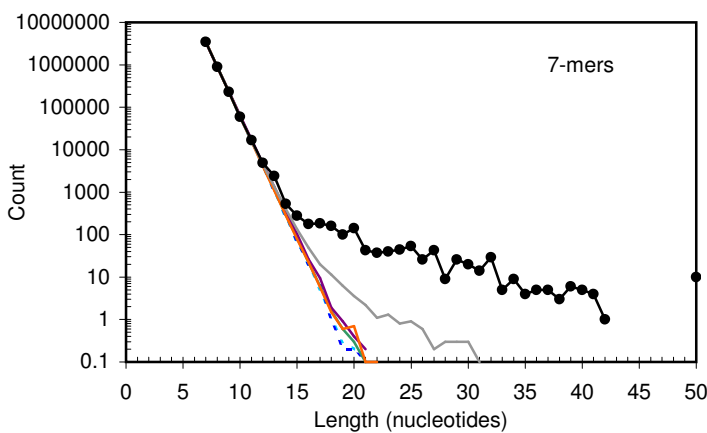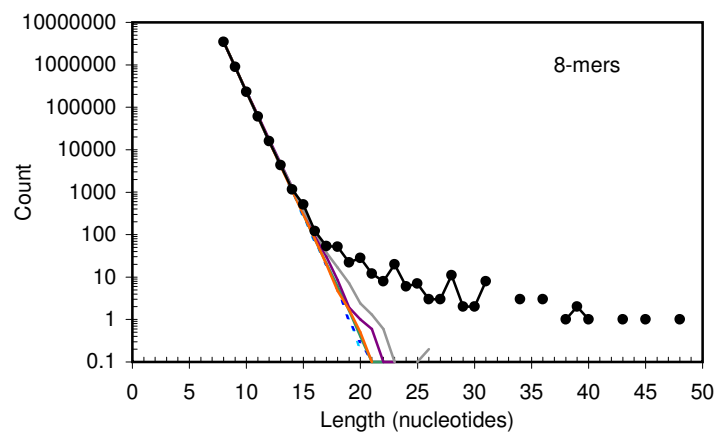

# *Anabaena variabilis* ATCC 29413

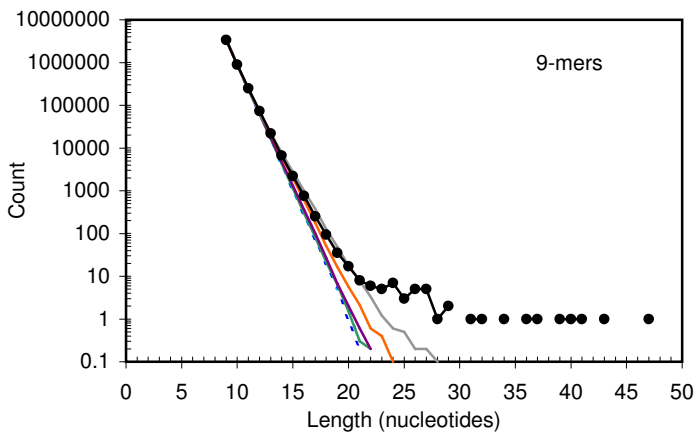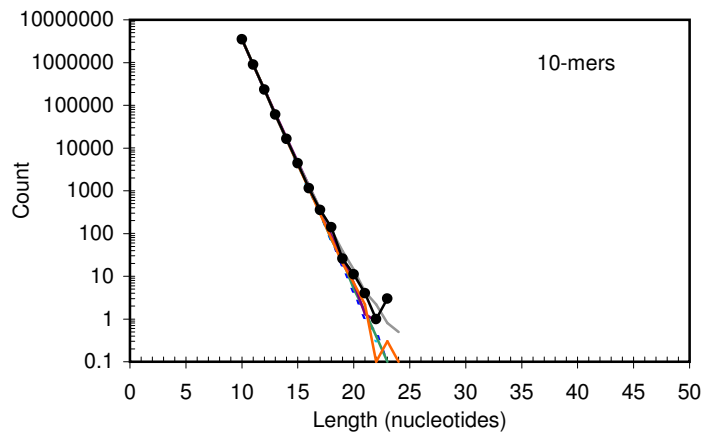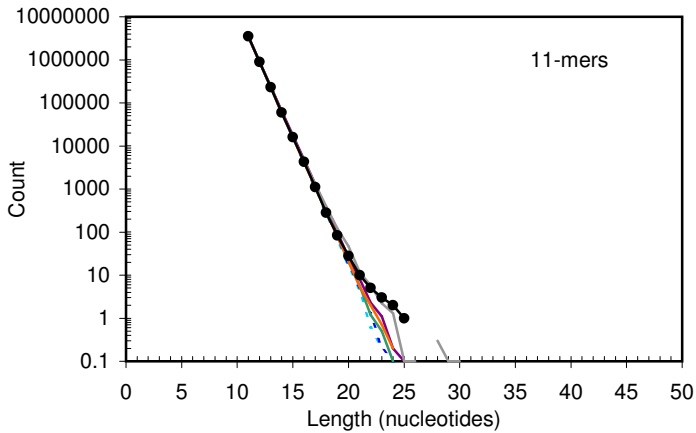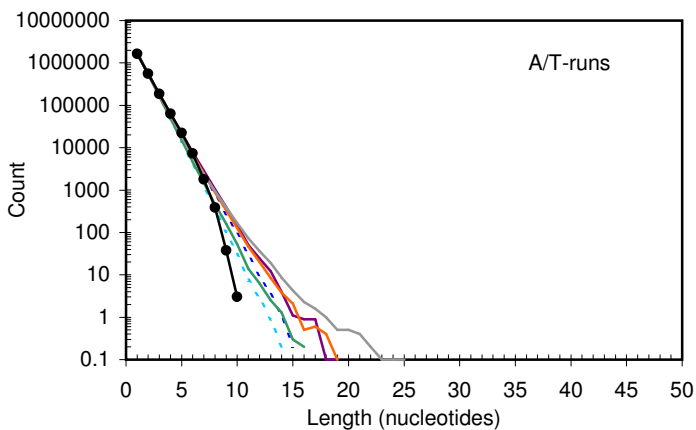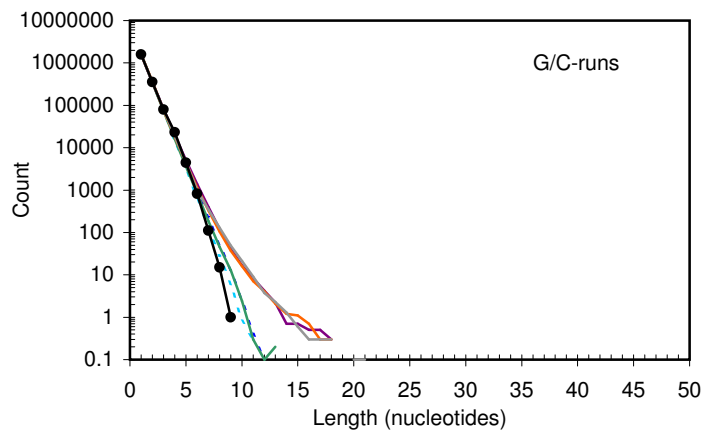

*Burkholderia cenocepacia* AU 1054  
chromosome 1

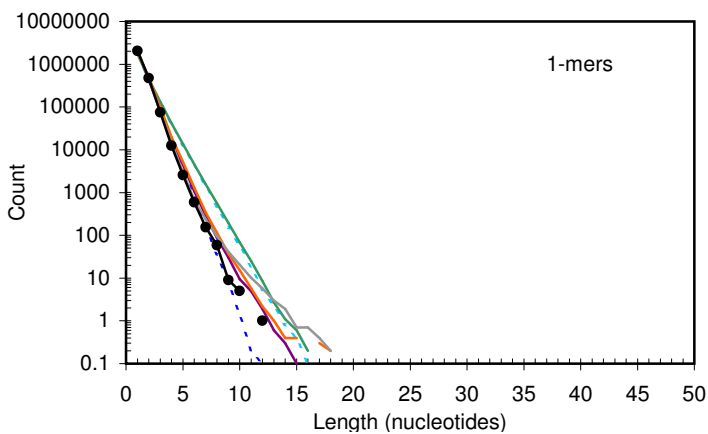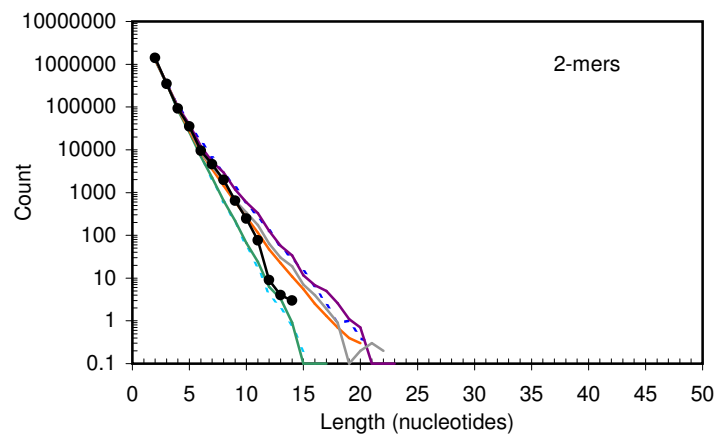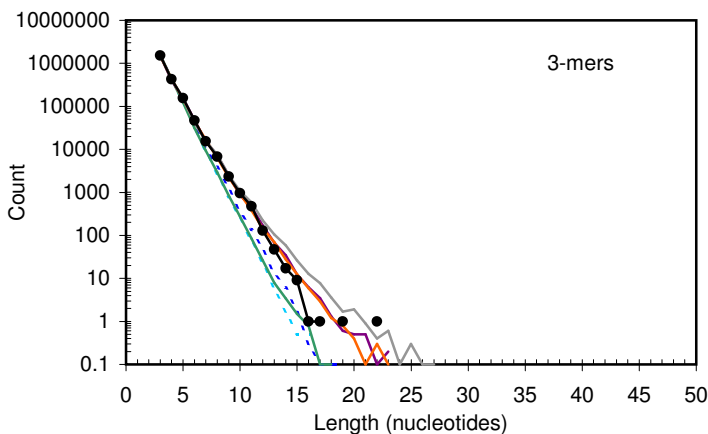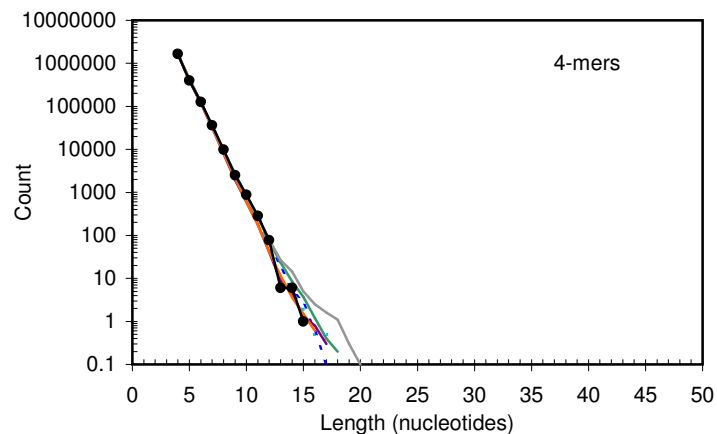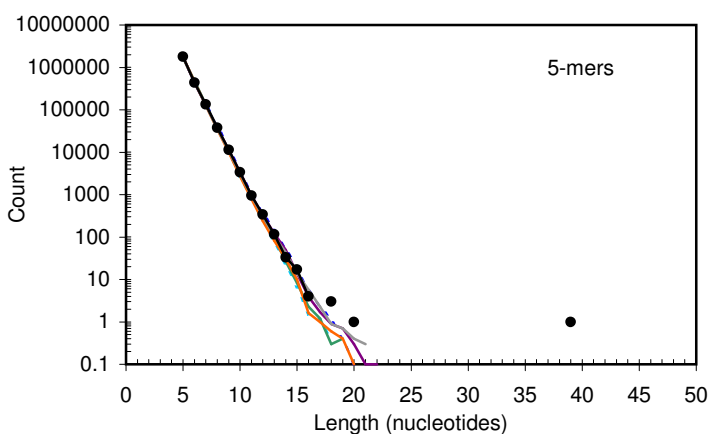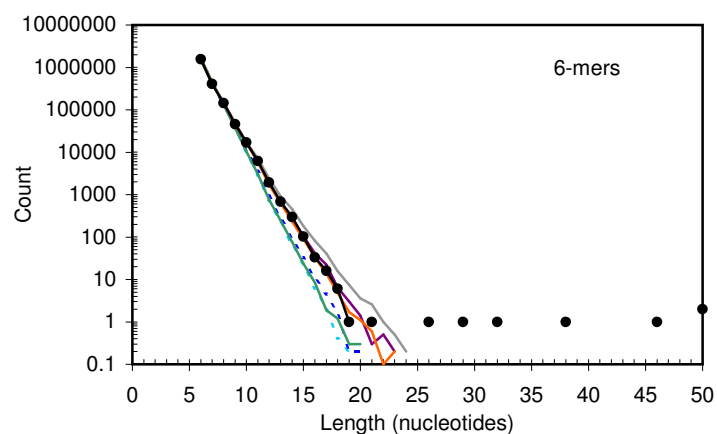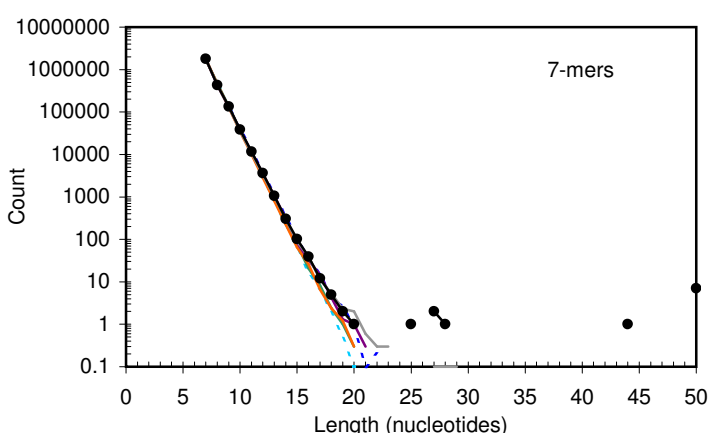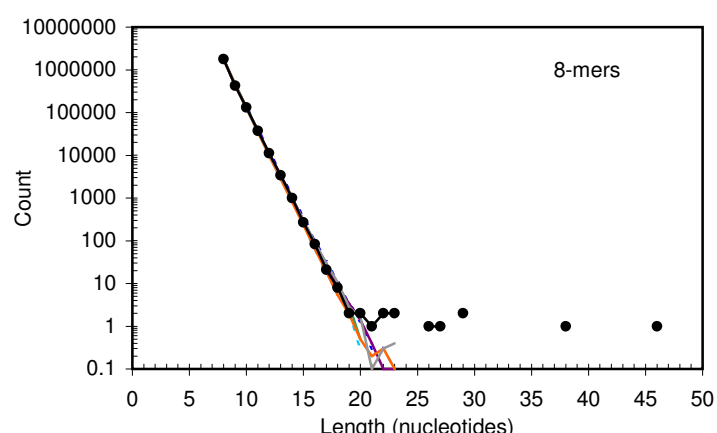

*Burkholderia cenocepacia* AU 1054  
chromosome 1

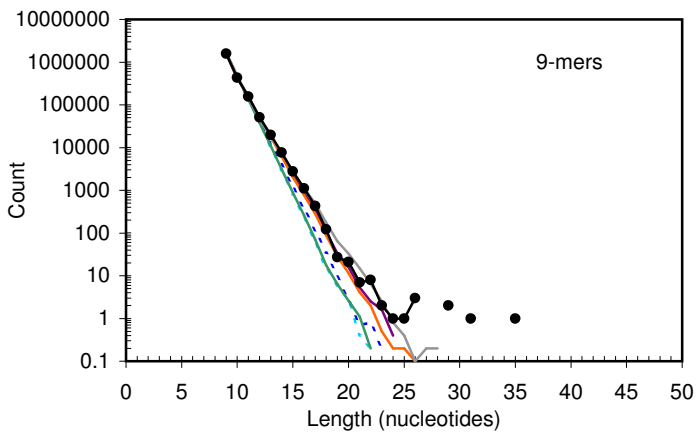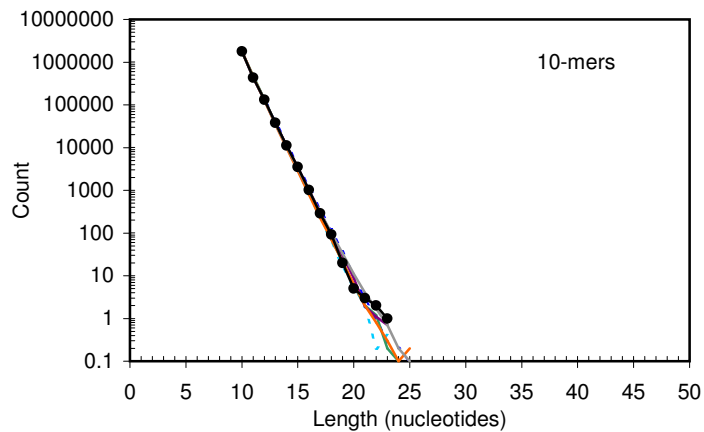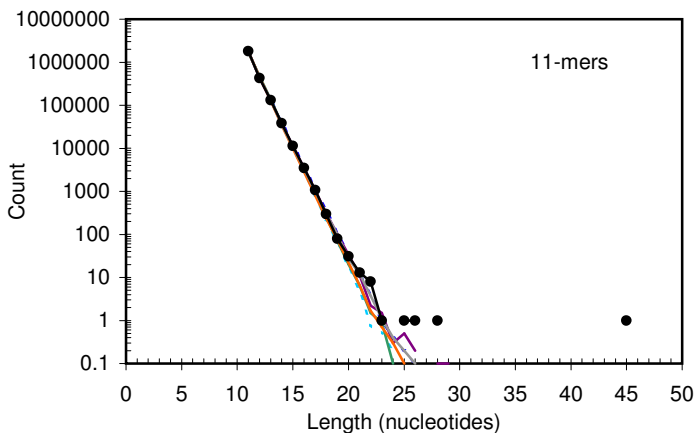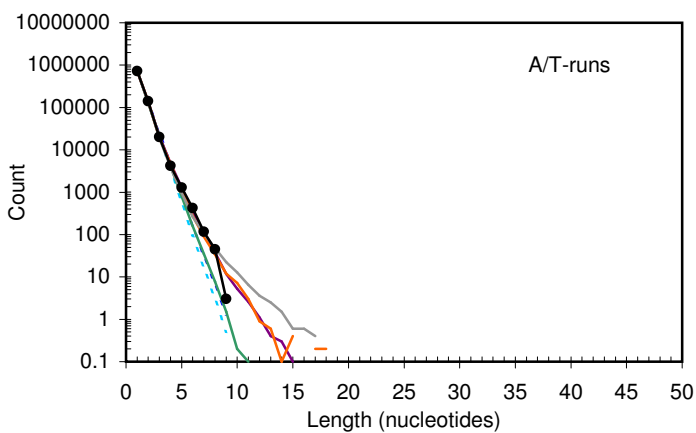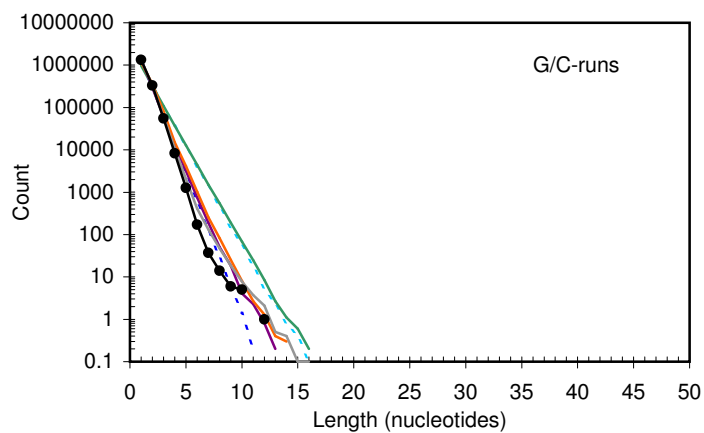

*Burkholderia cenocepacia* AU 1054  
chromosome 2

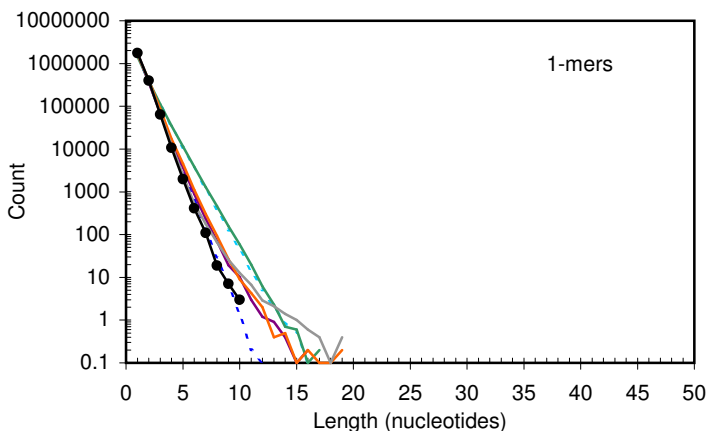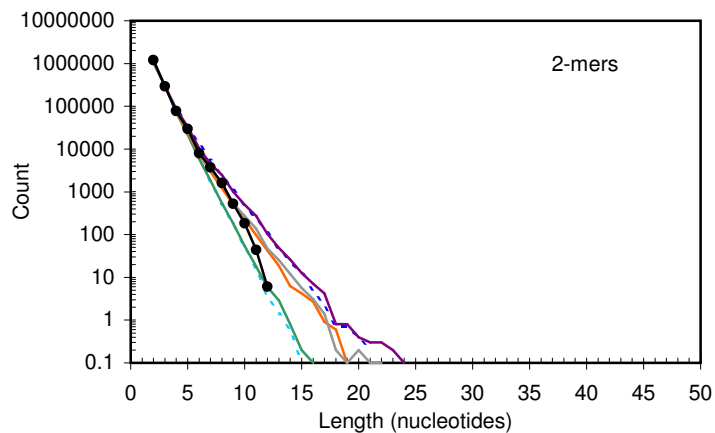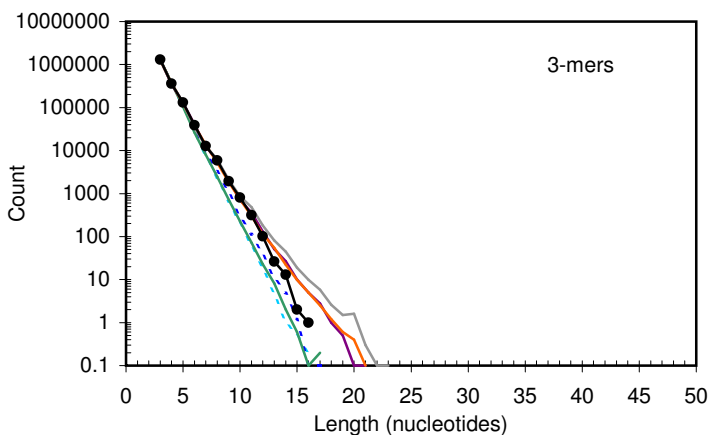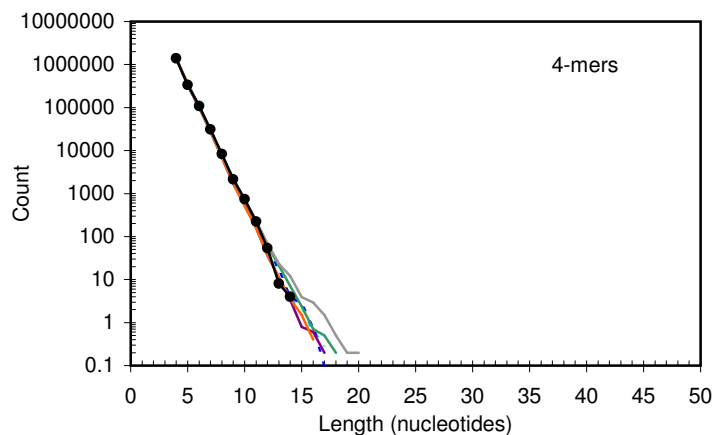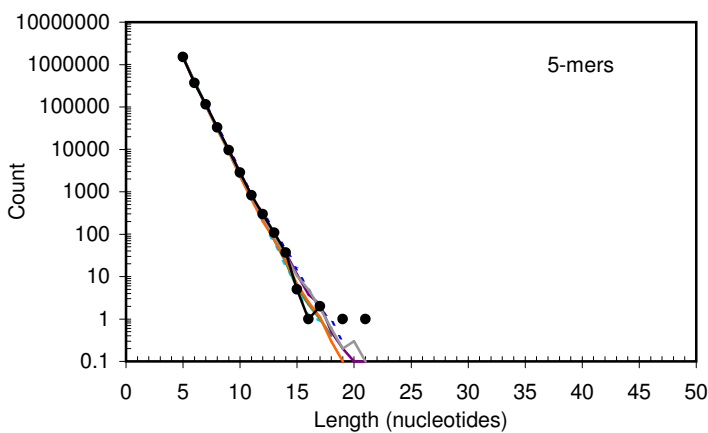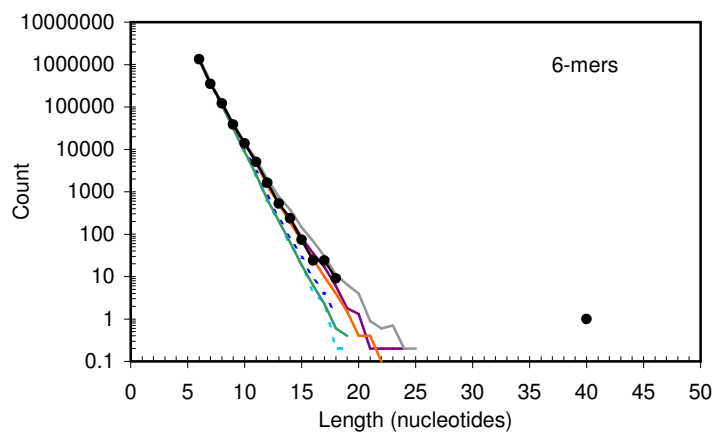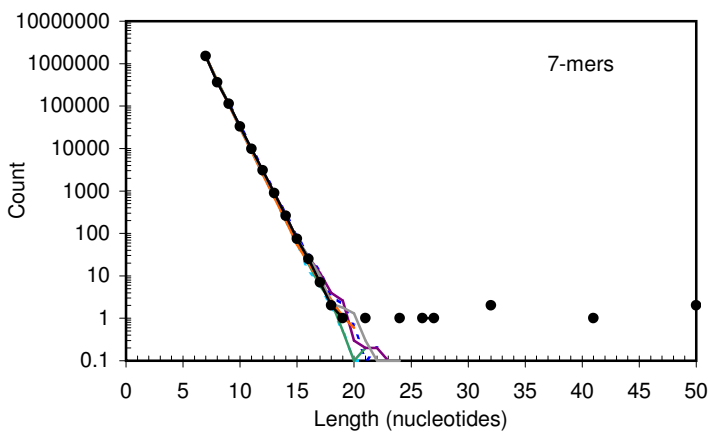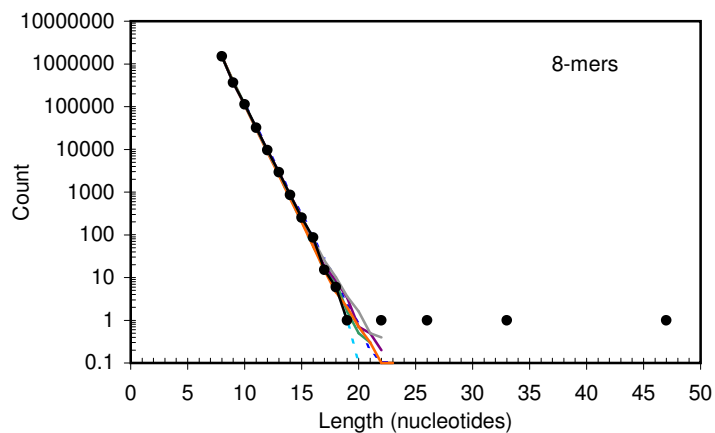

*Burkholderia cenocepacia* AU 1054  
chromosome 2

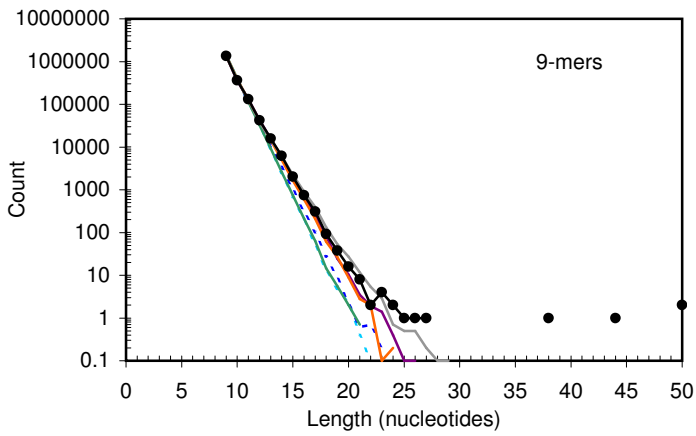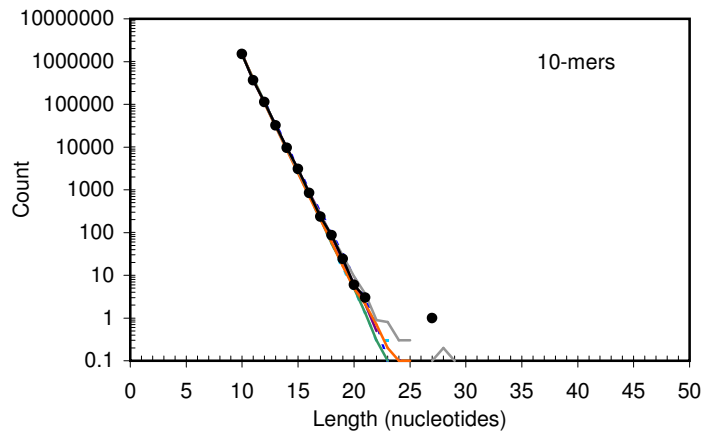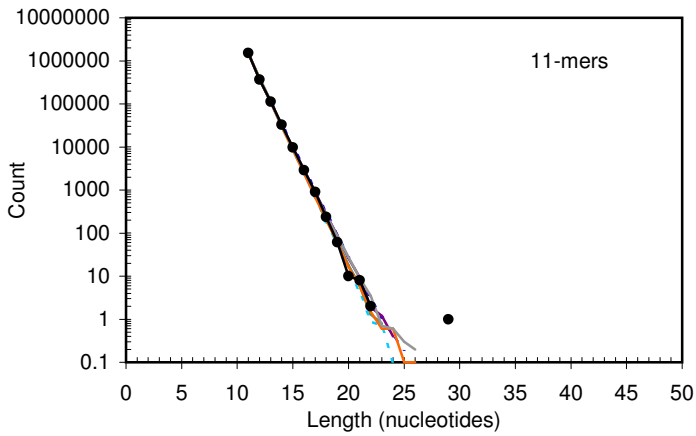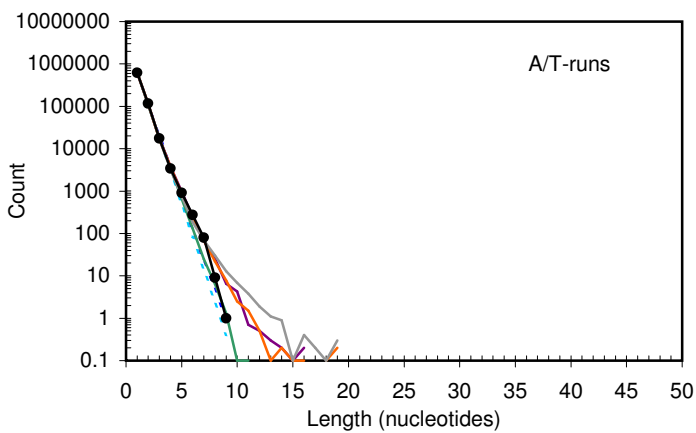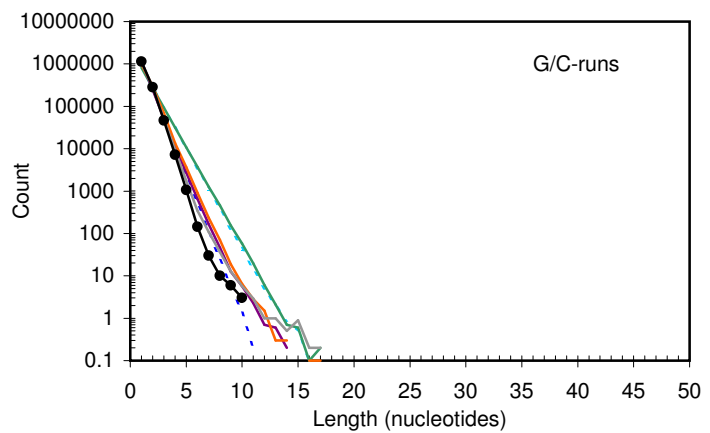

*Burkholderia mallei* ATCC 23344  
chromosome 1

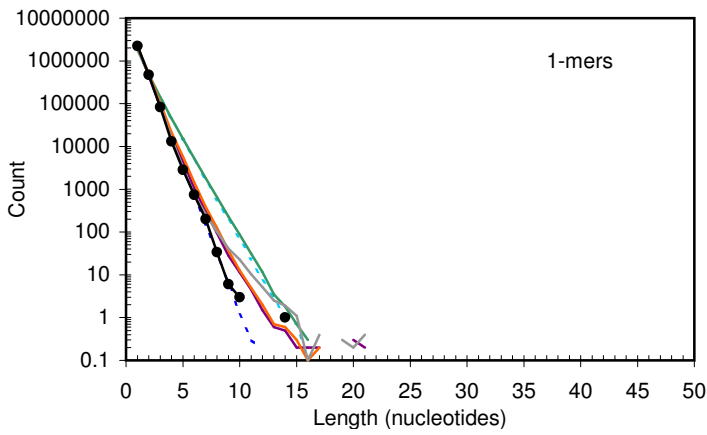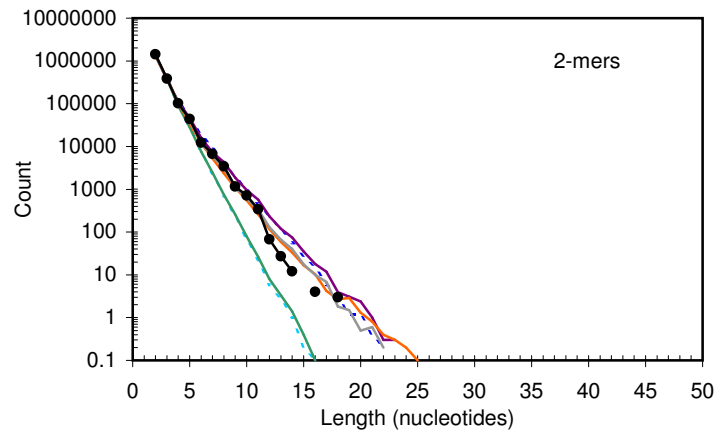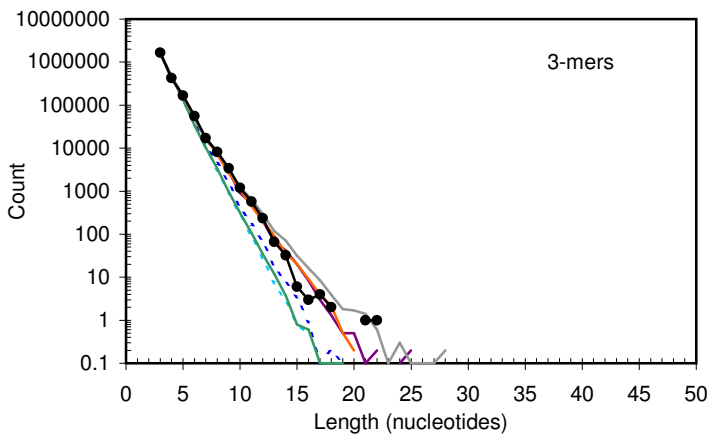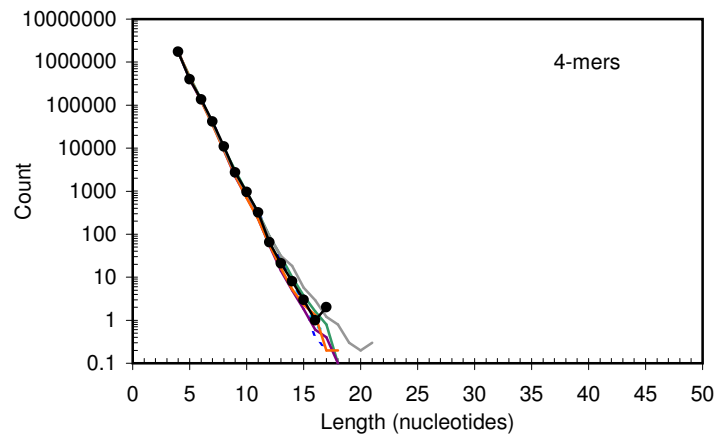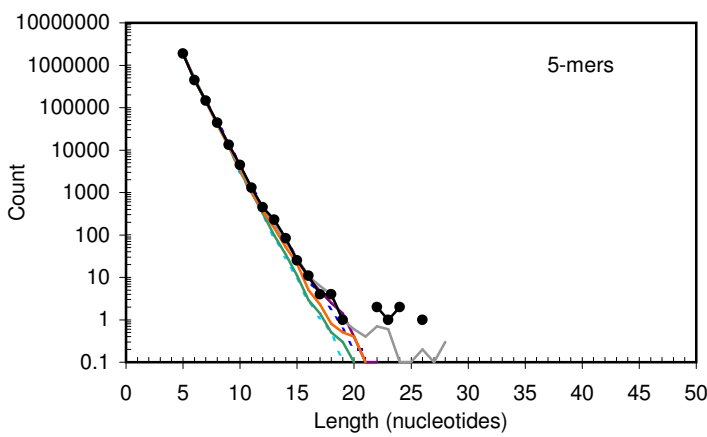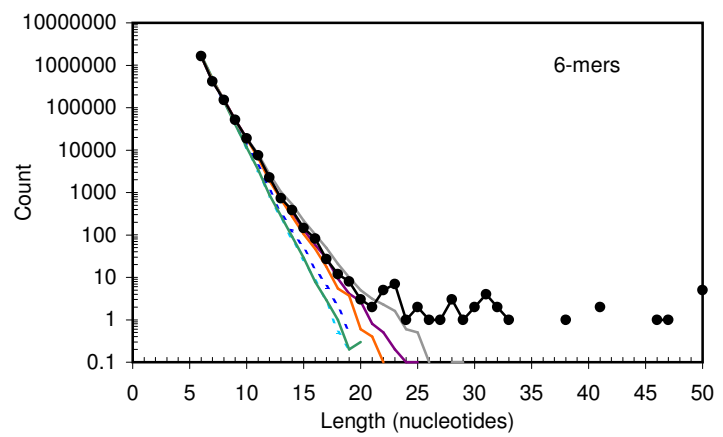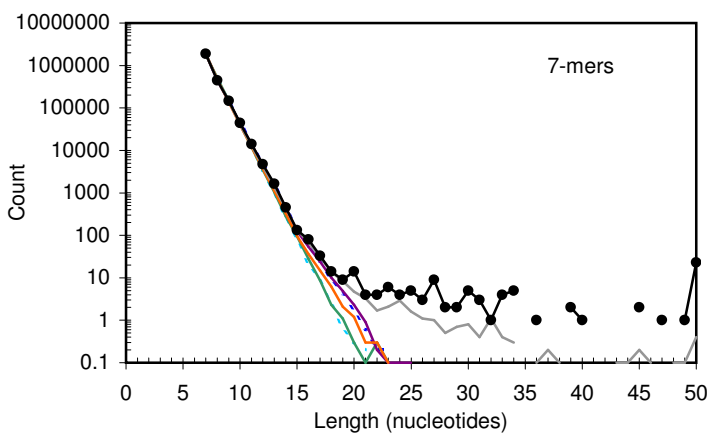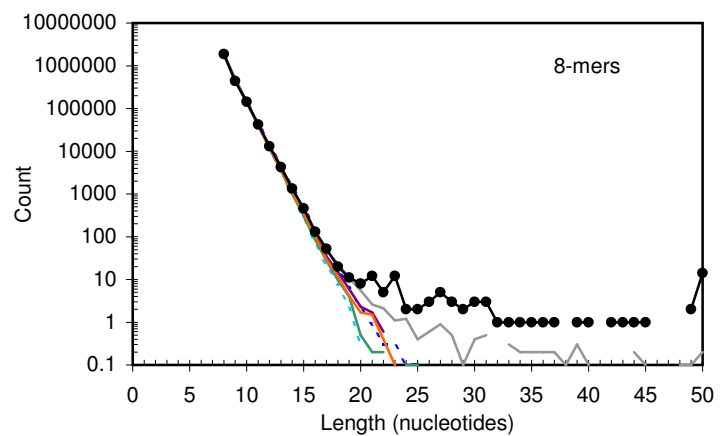

*Burkholderia mallei* ATCC 23344  
chromosome 1

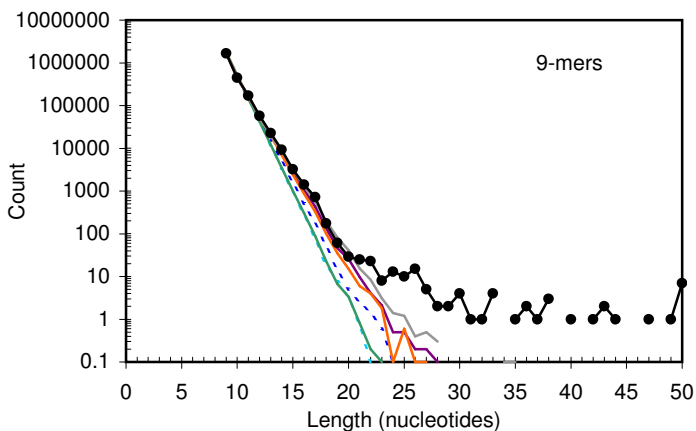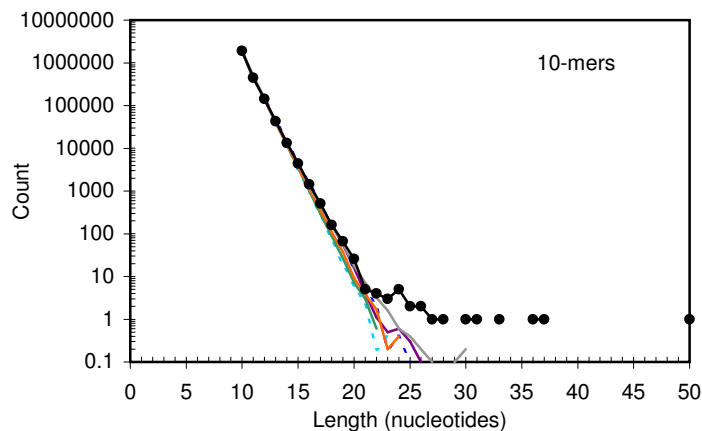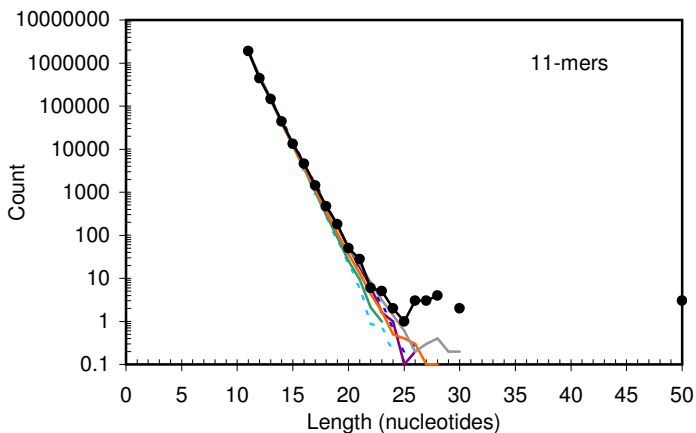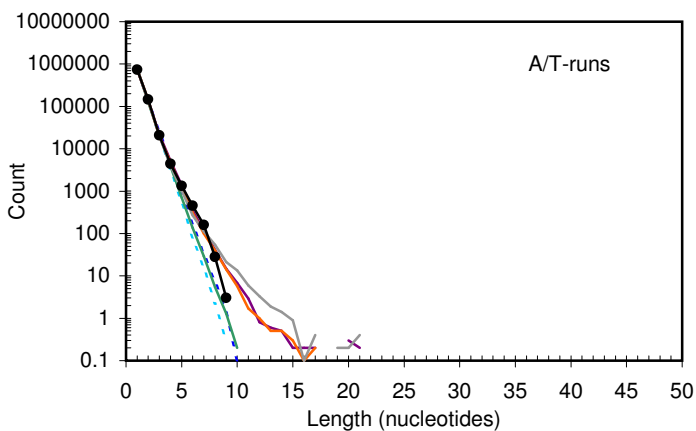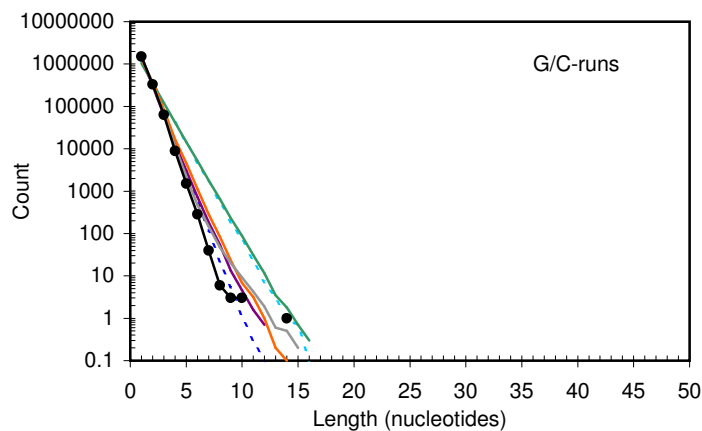



*Burkholderia mallei* ATCC 23344  
chromosome 2

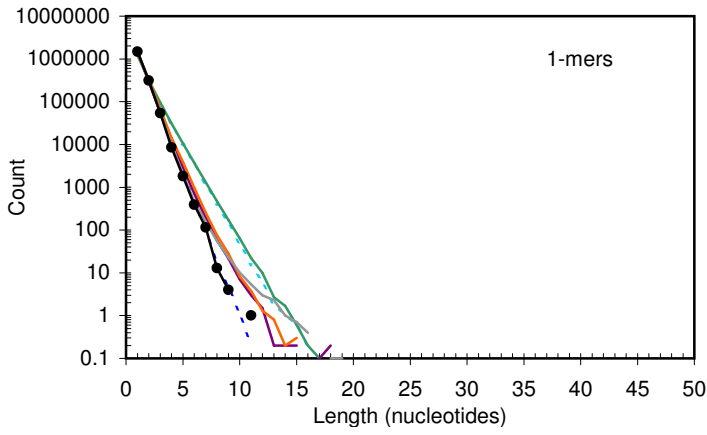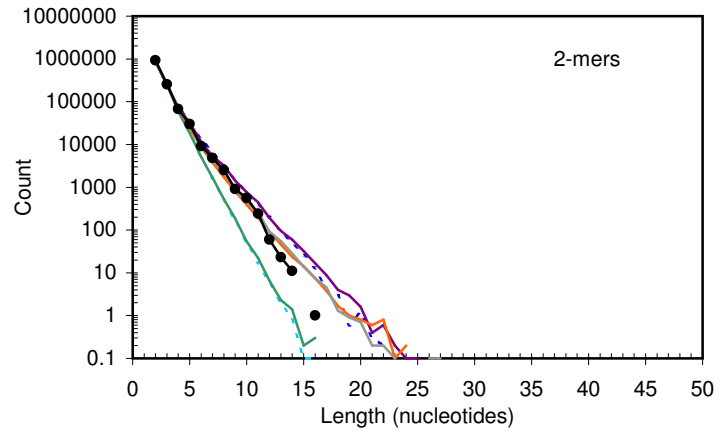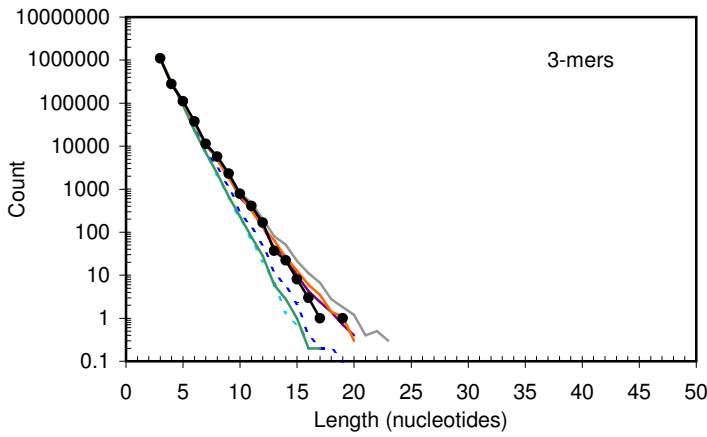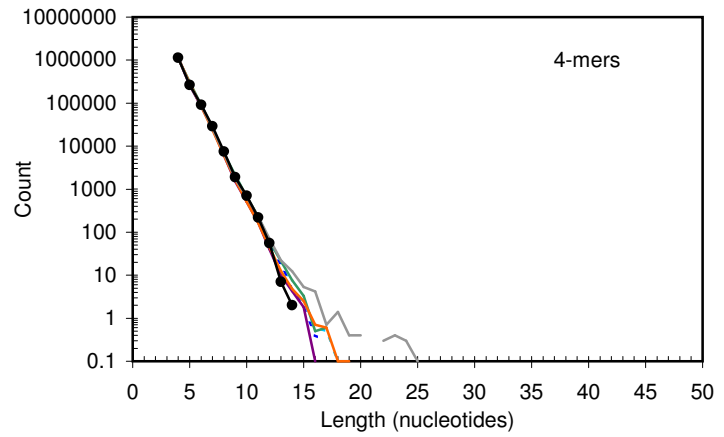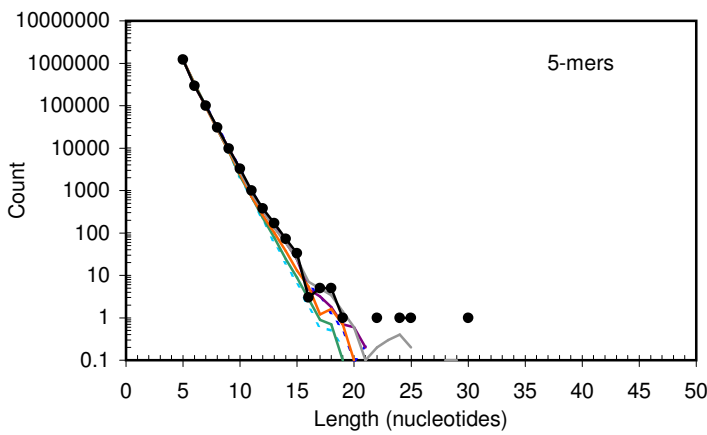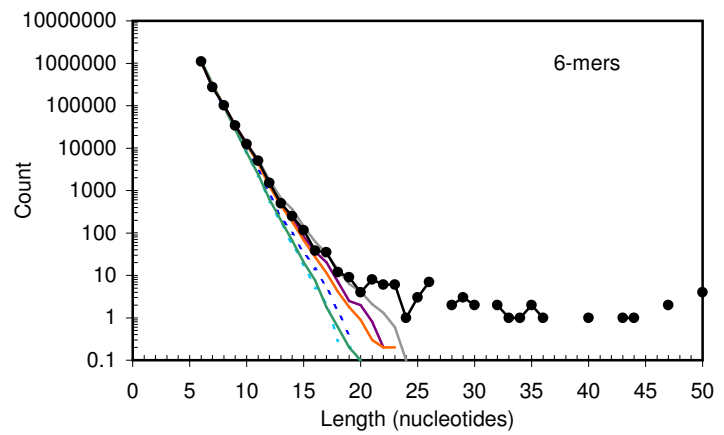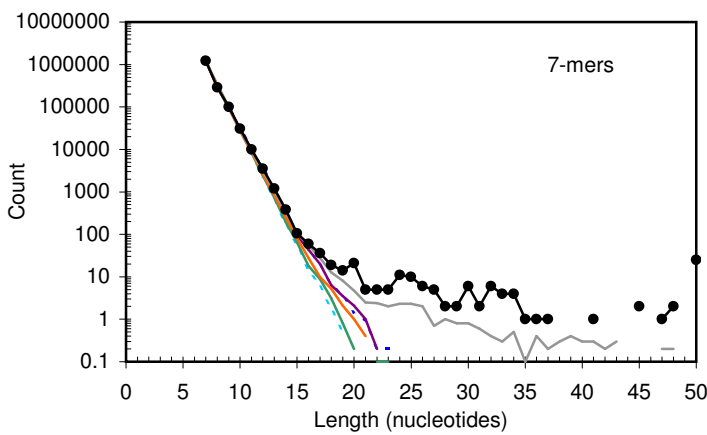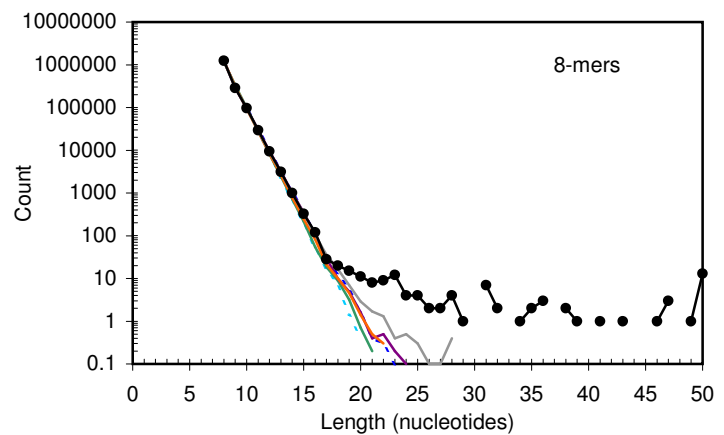

*Burkholderia mallei* ATCC 23344  
chromosome 2

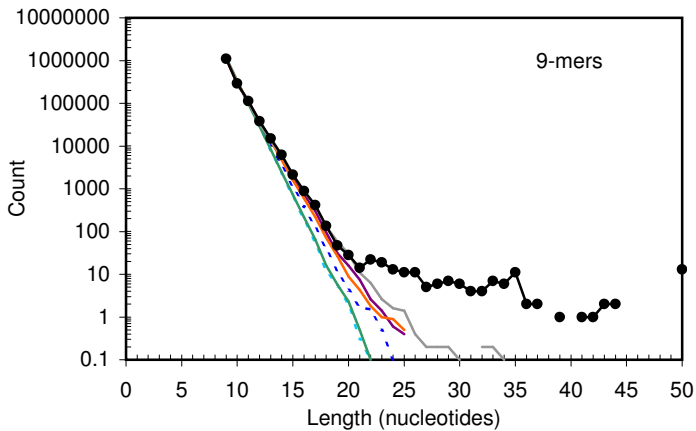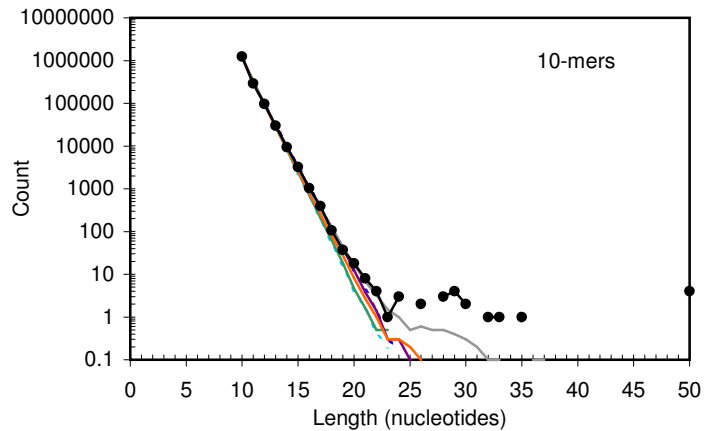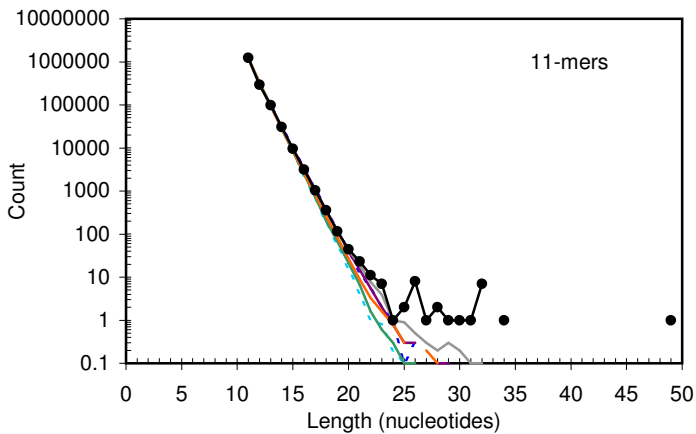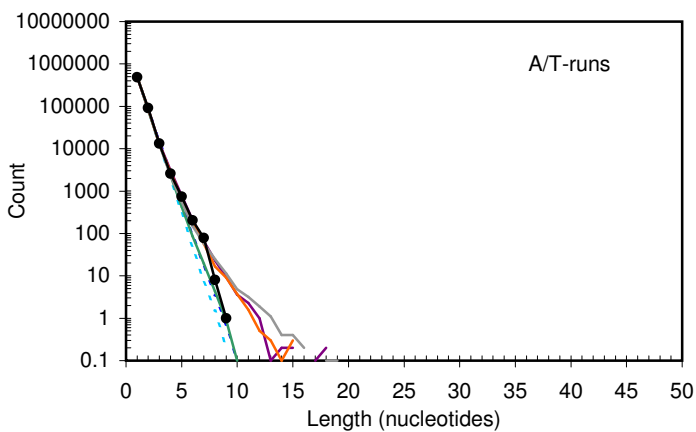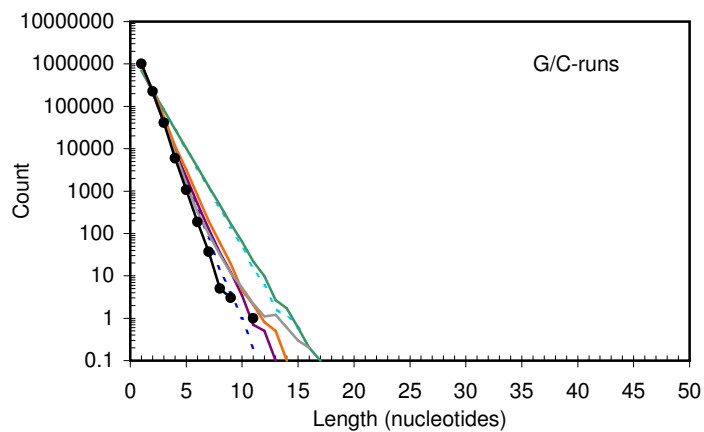

*Burkholderia pseudomallei* K96243  
chromosome 1

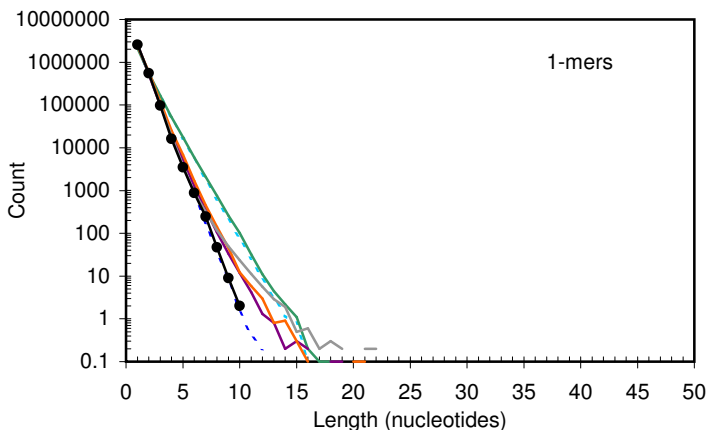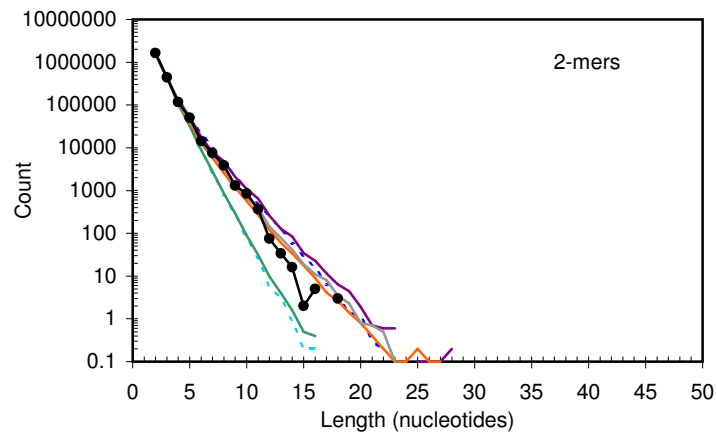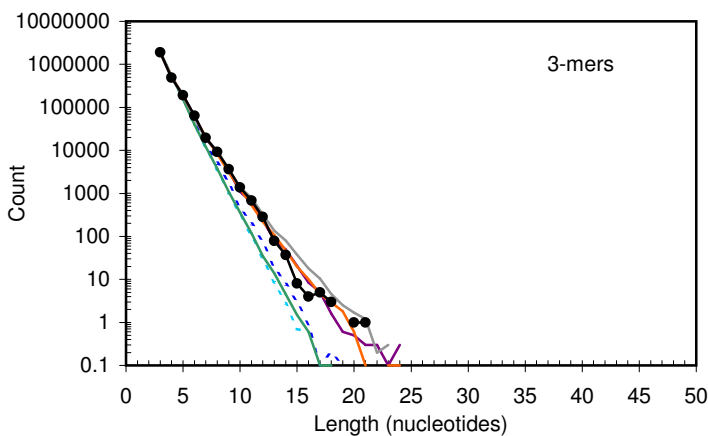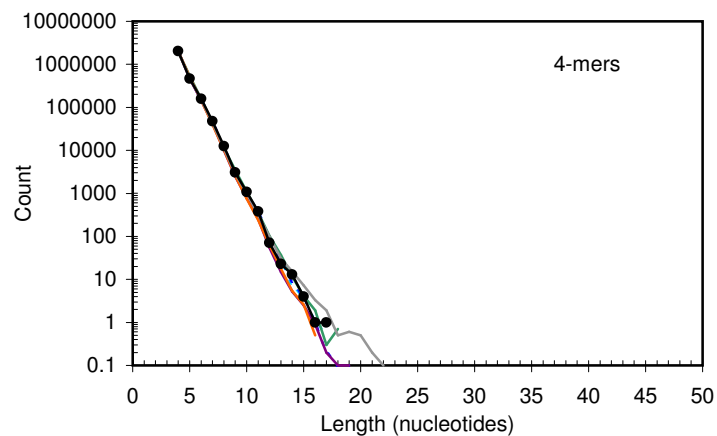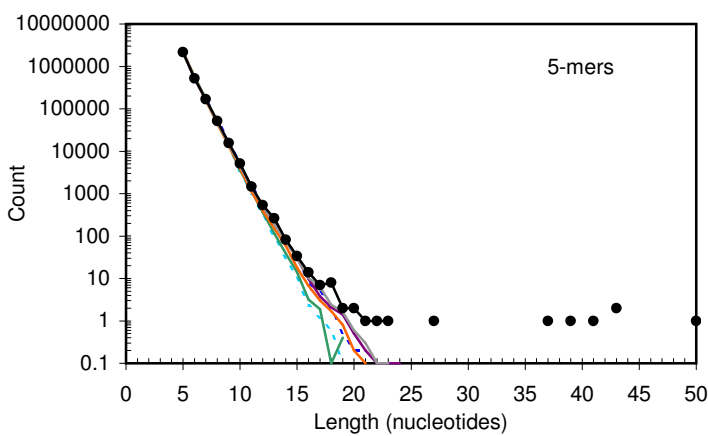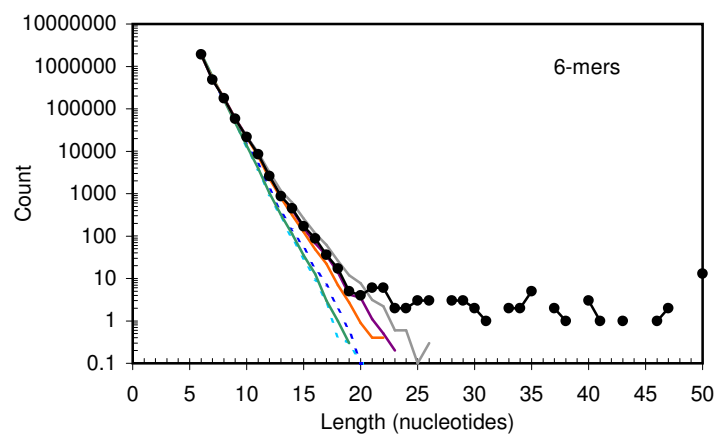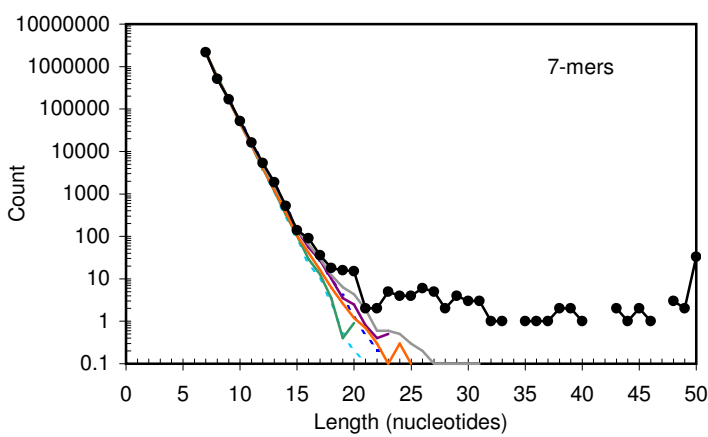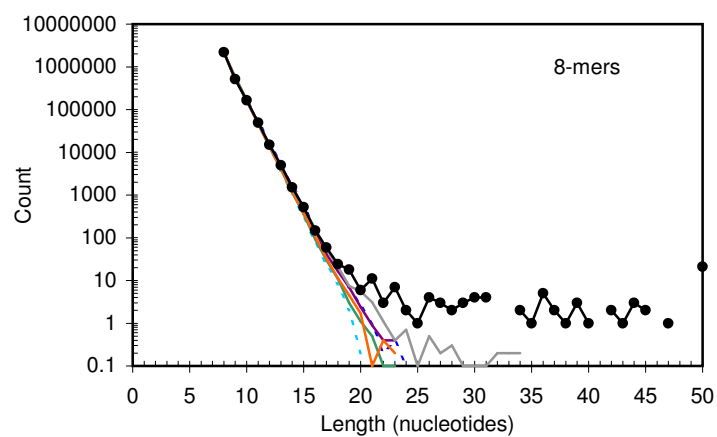

*Burkholderia pseudomallei* K96243  
chromosome 1

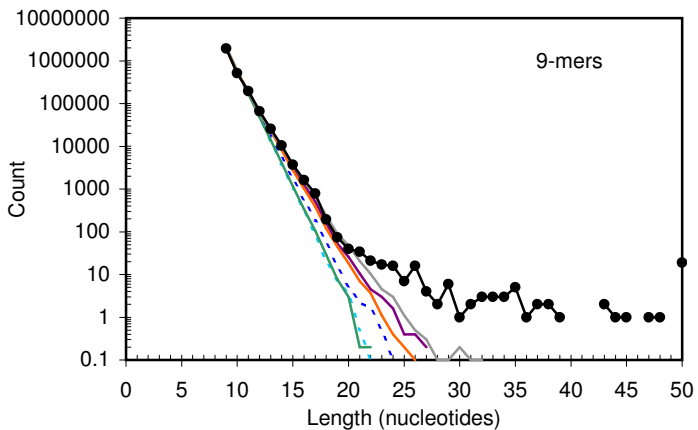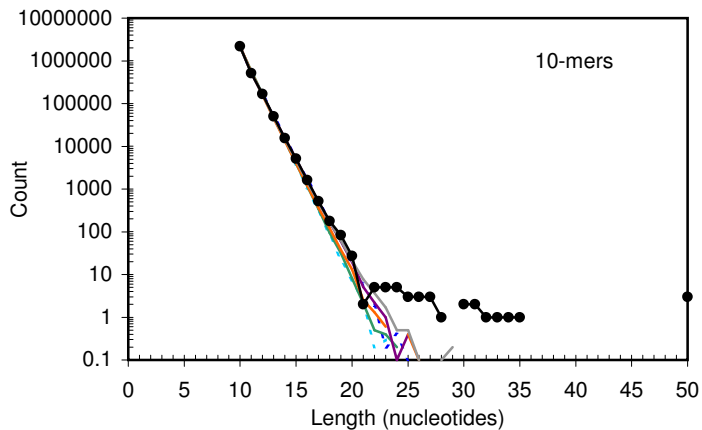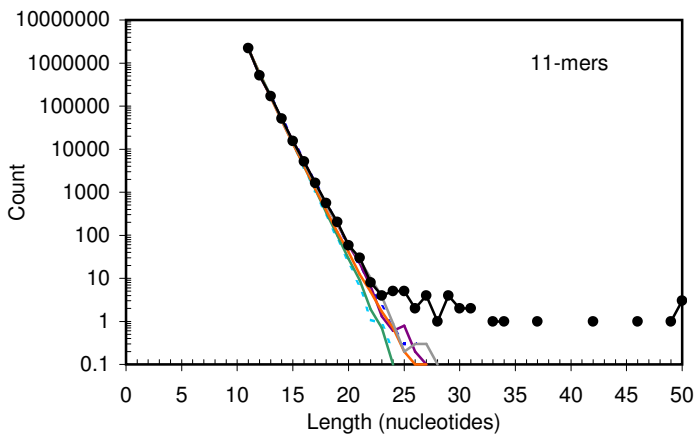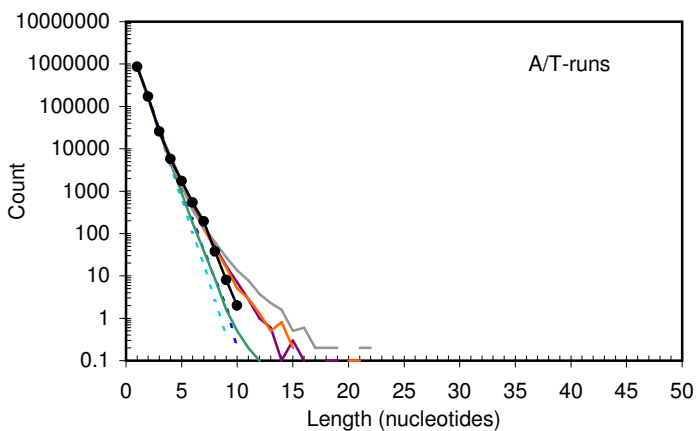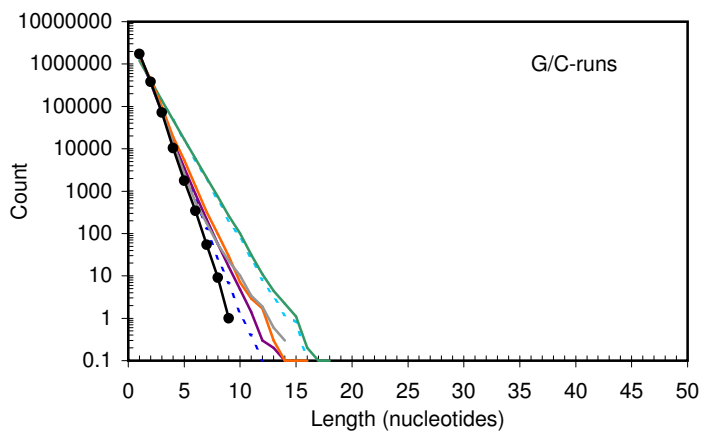

*Burkholderia pseudomallei* K96243  
chromosome 2

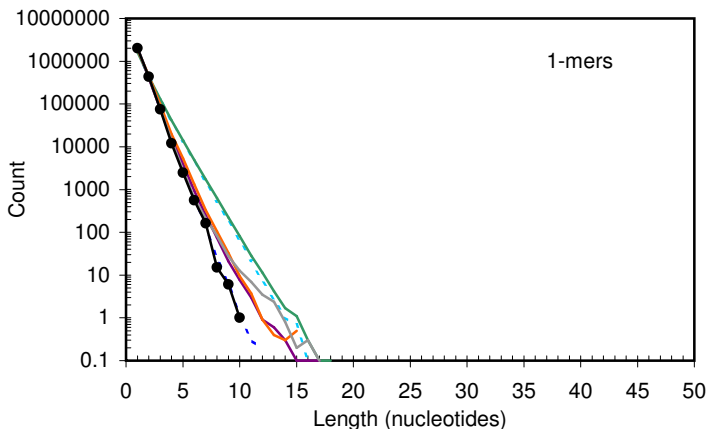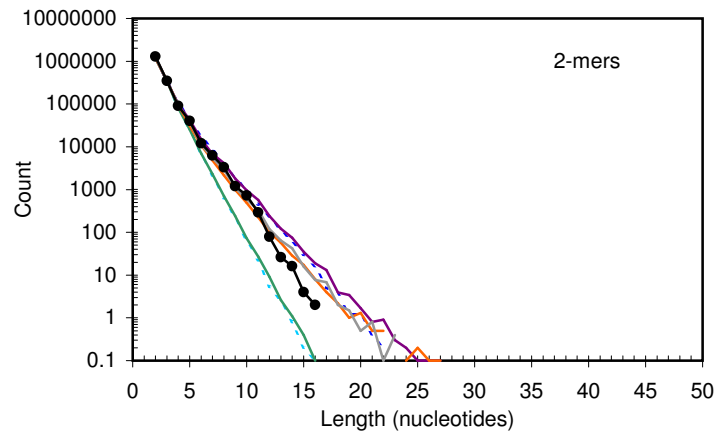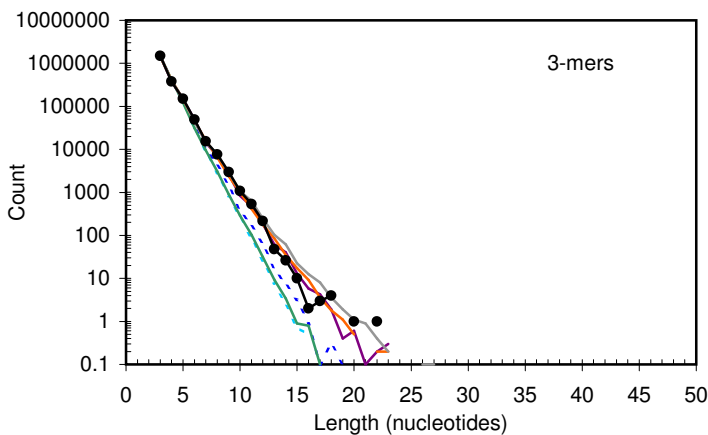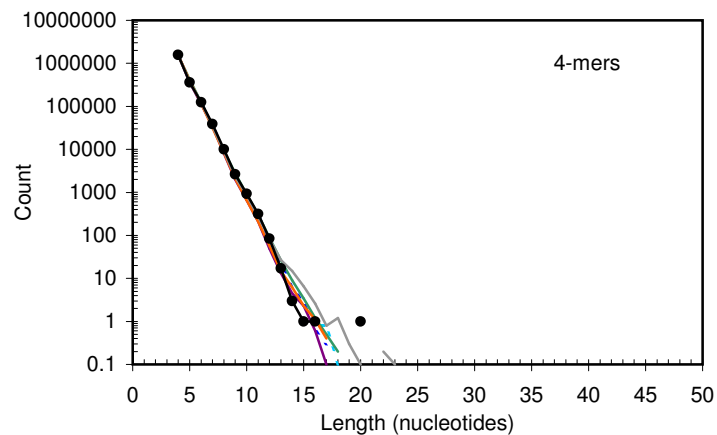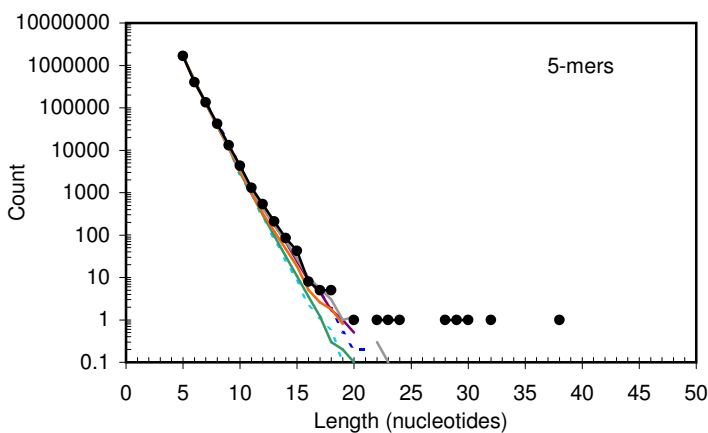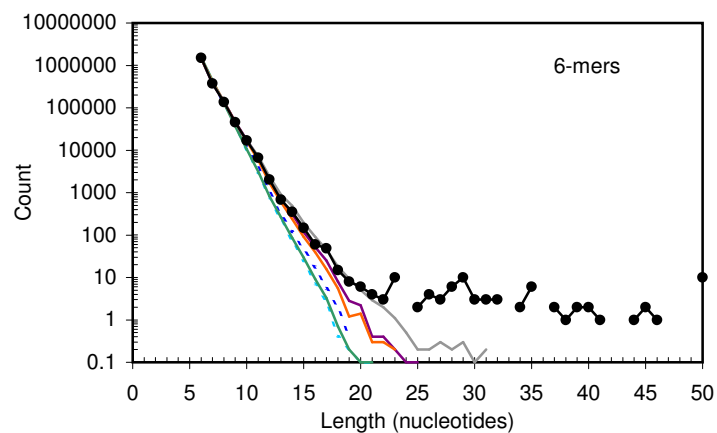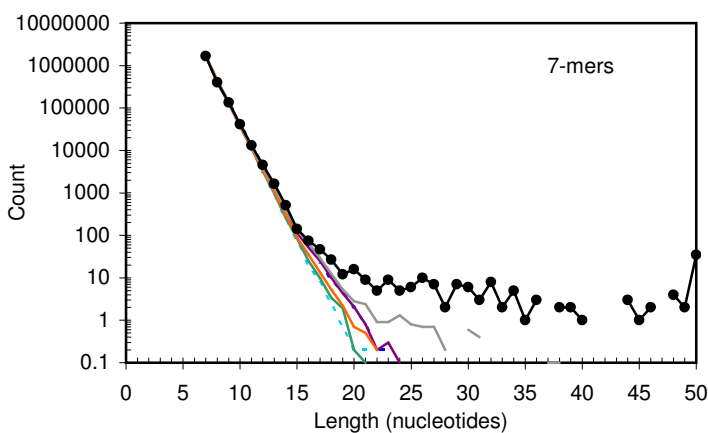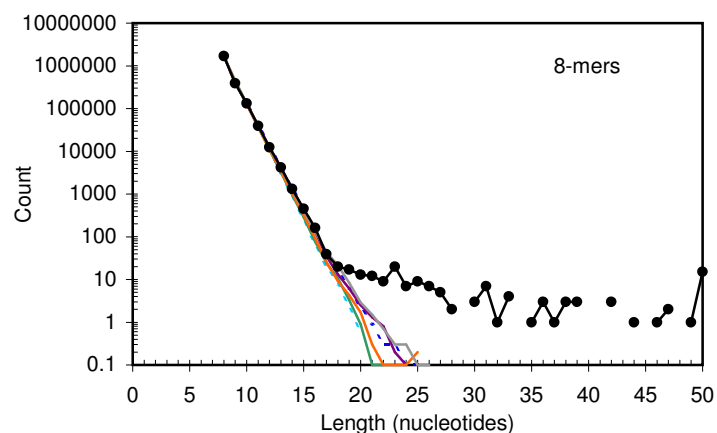

*Burkholderia pseudomallei* K96243  
chromosome 2

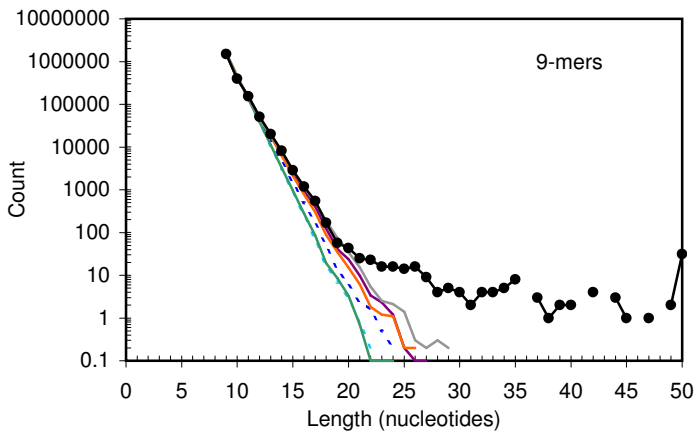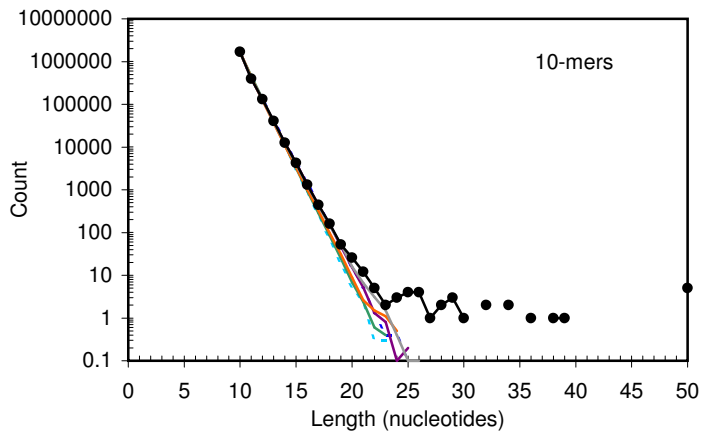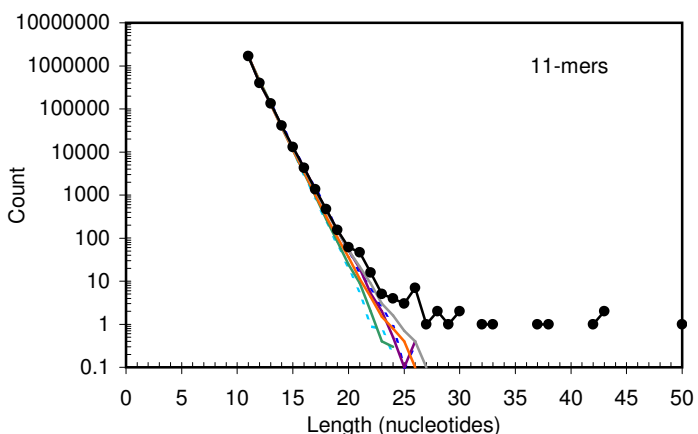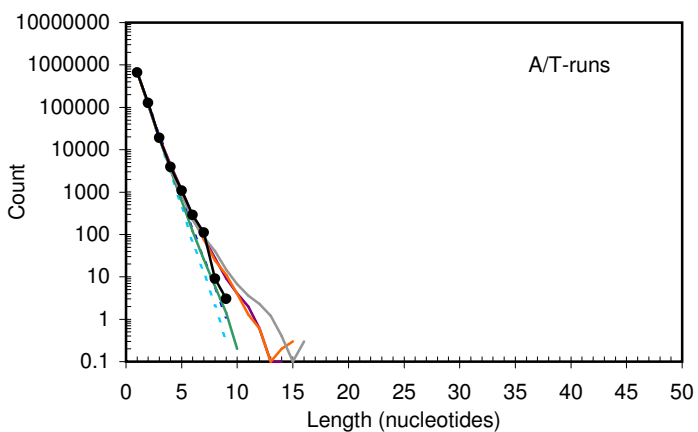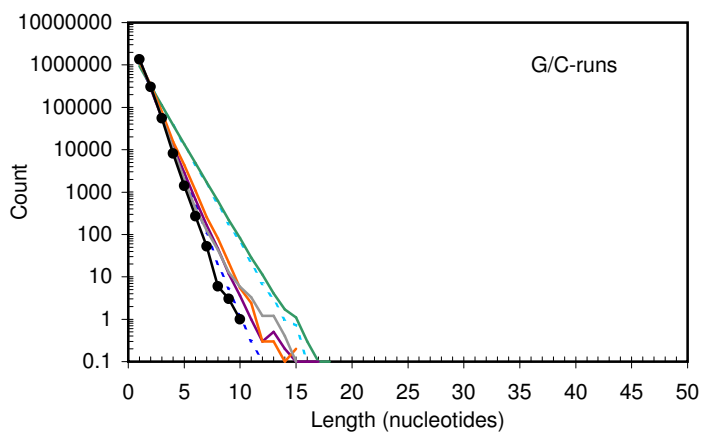

*Burkholderia* sp. 383  
chromosome 1

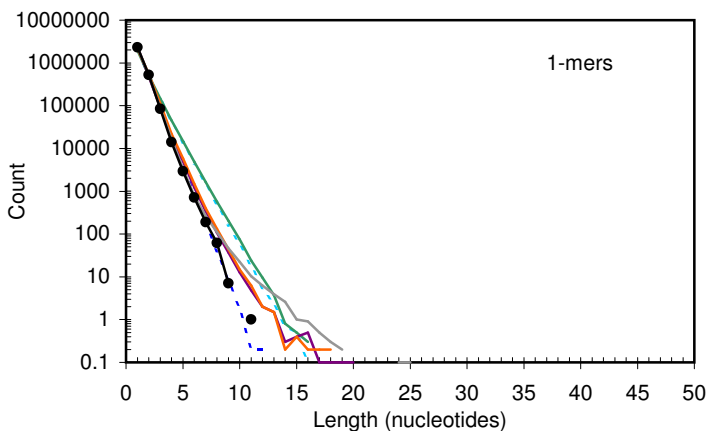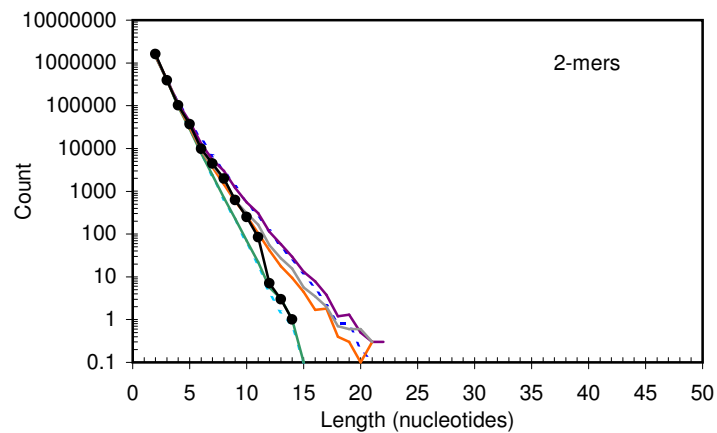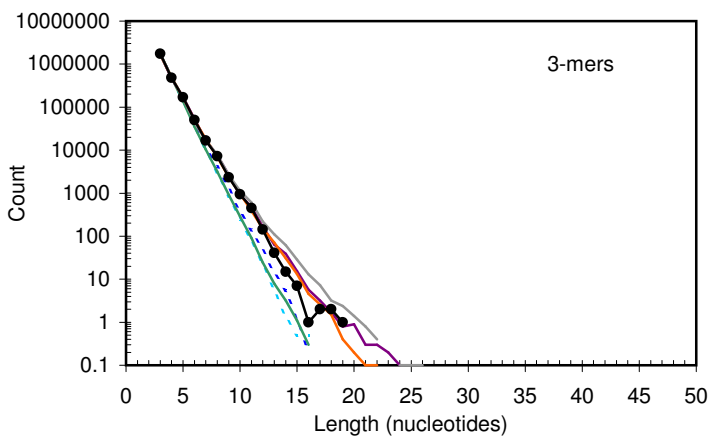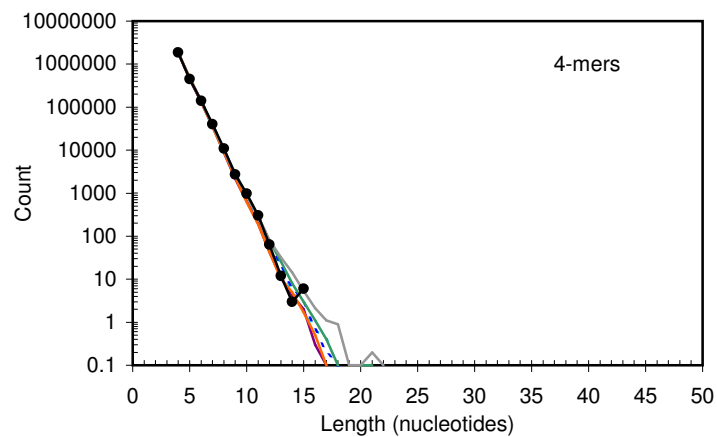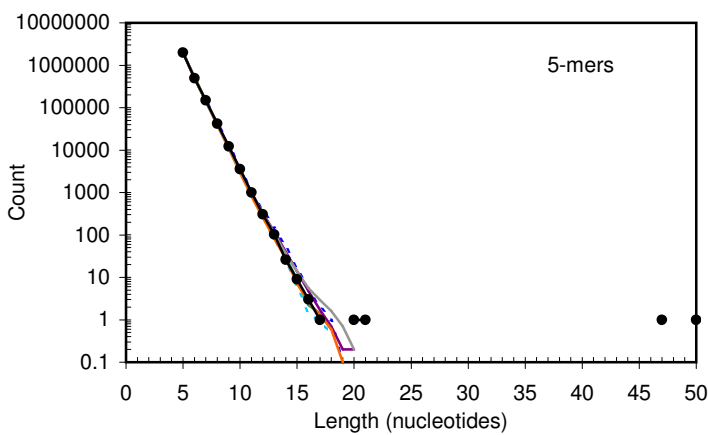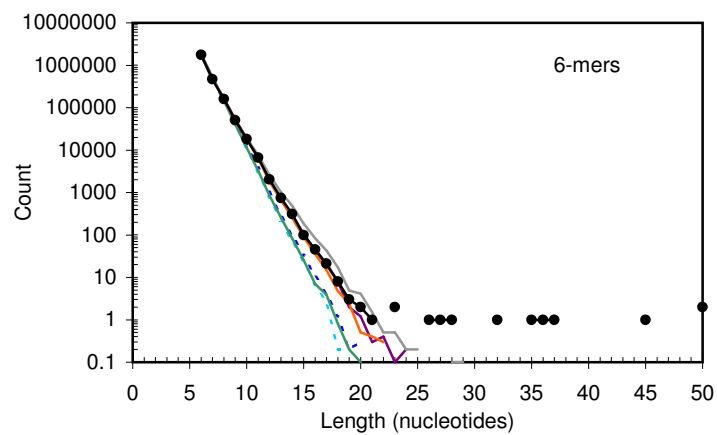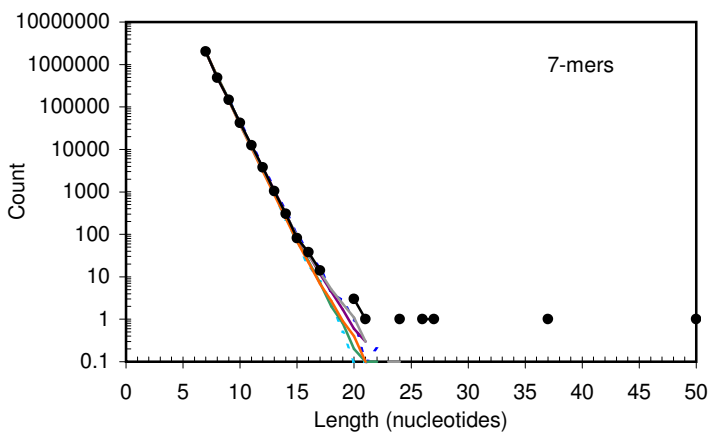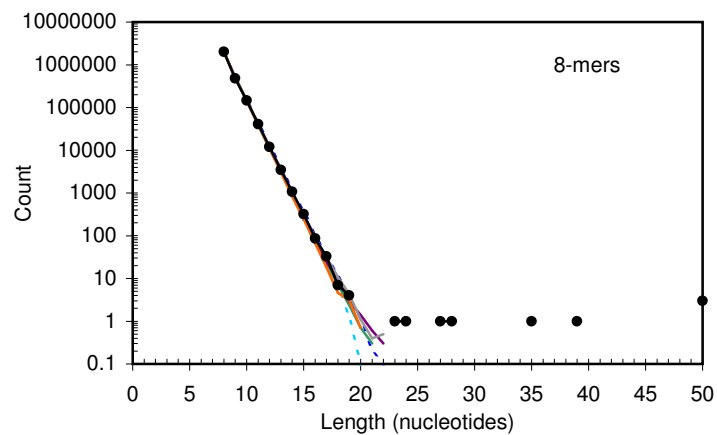

*Burkholderia* sp. 383  
chromosome 1

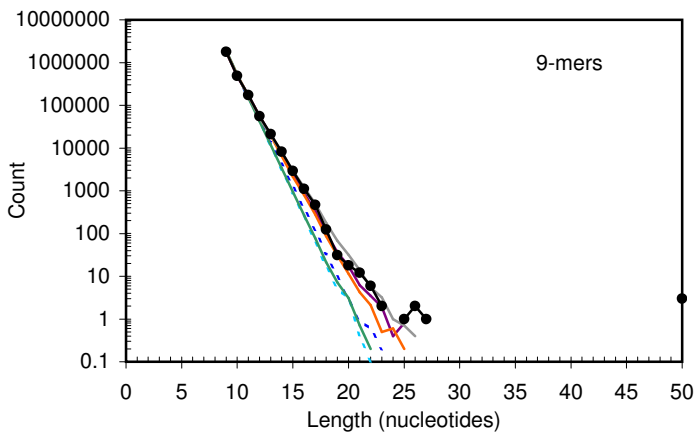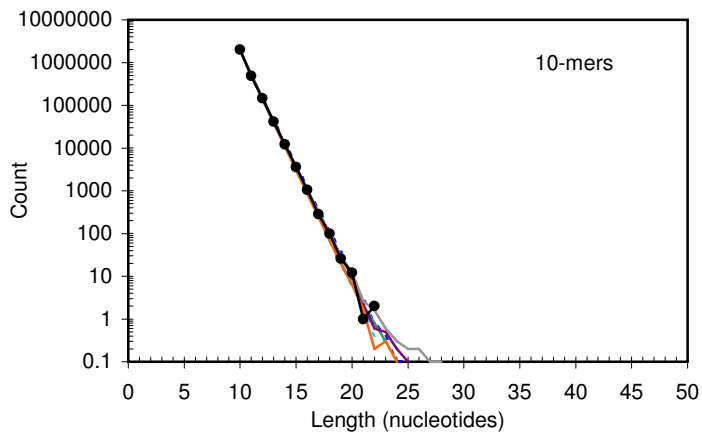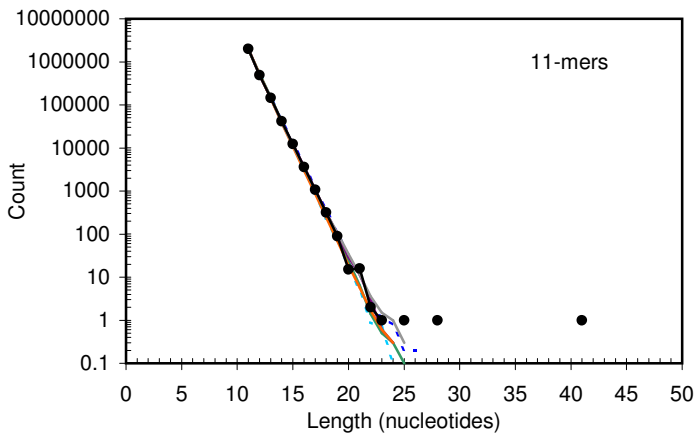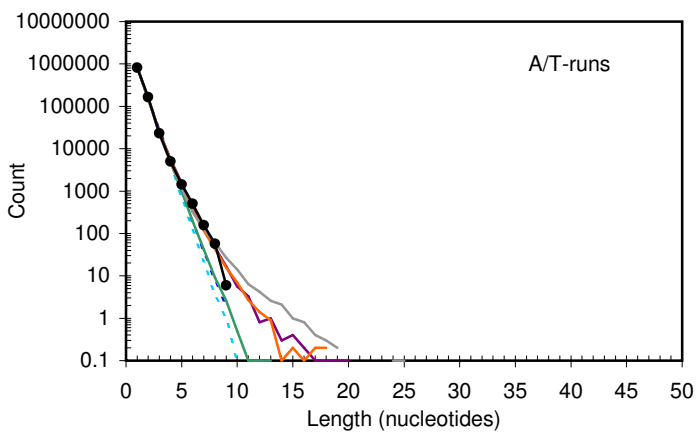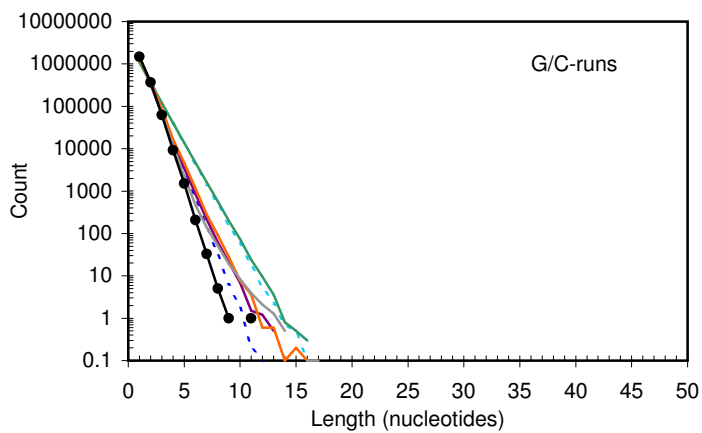



*Burkholderia* sp. 383  
chromosome 2

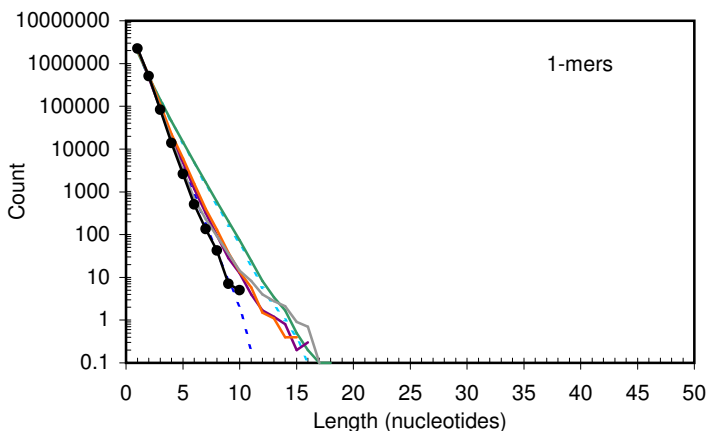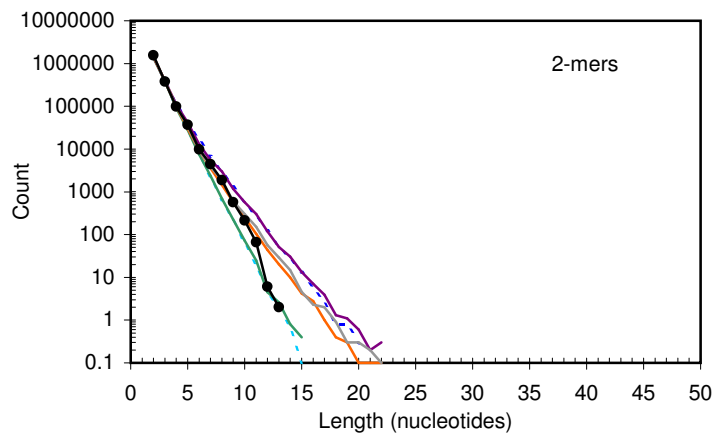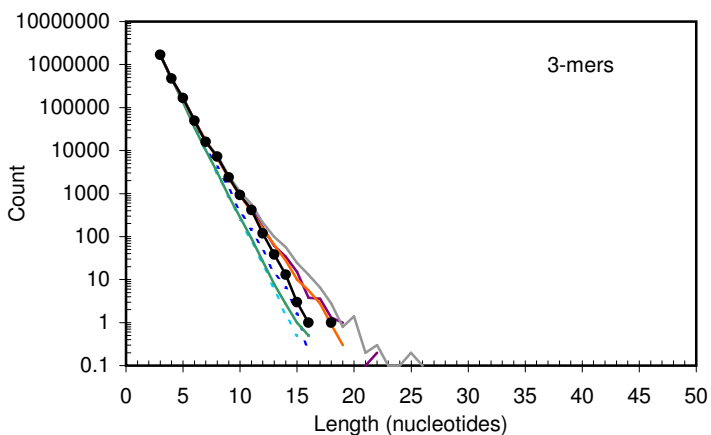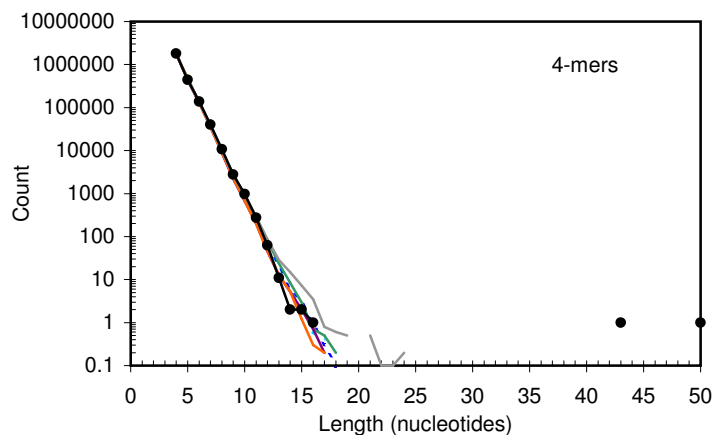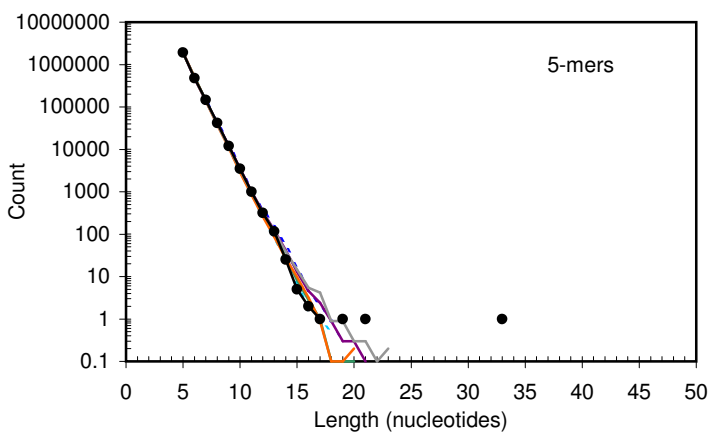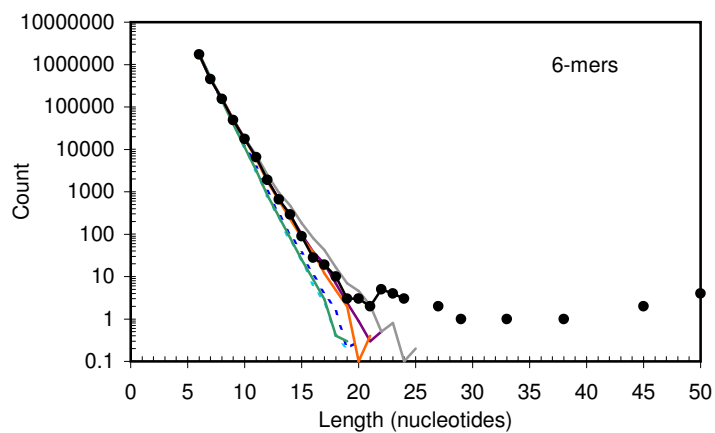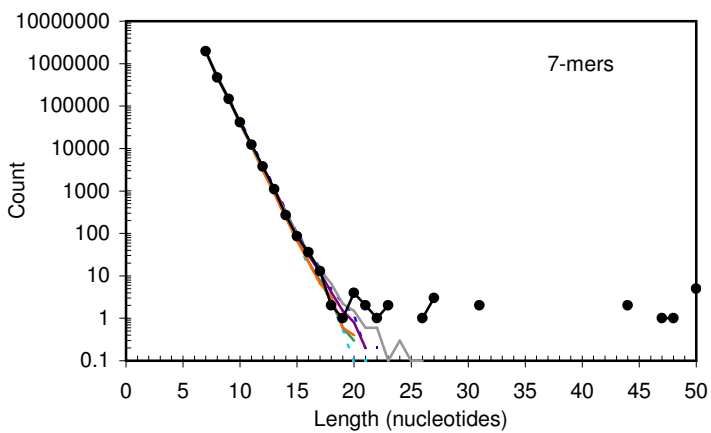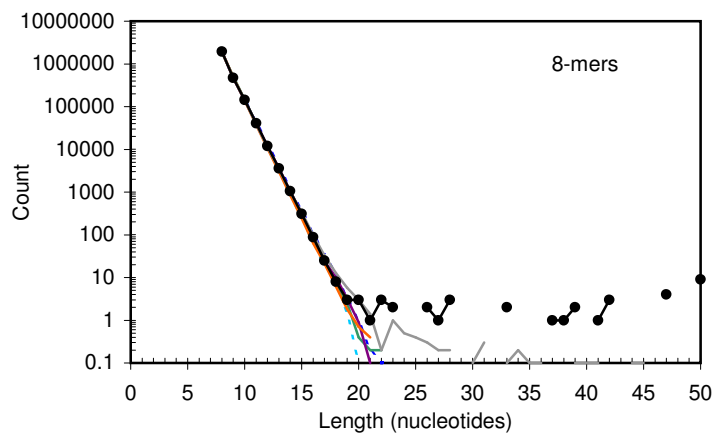

*Burkholderia* sp. 383  
chromosome 2

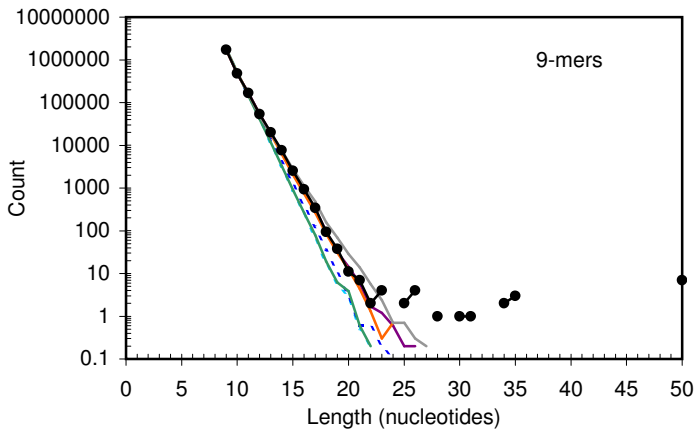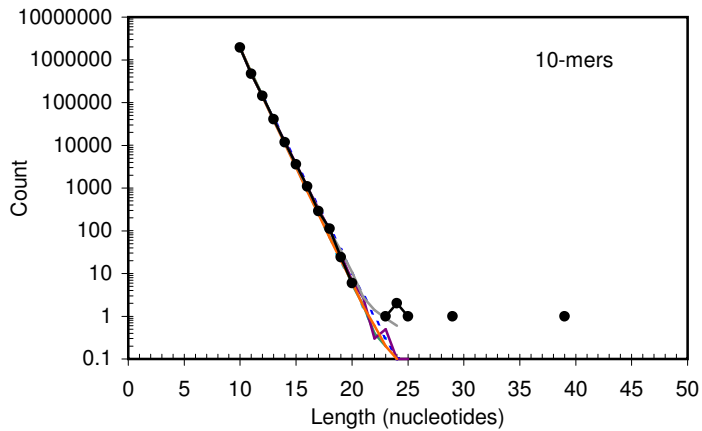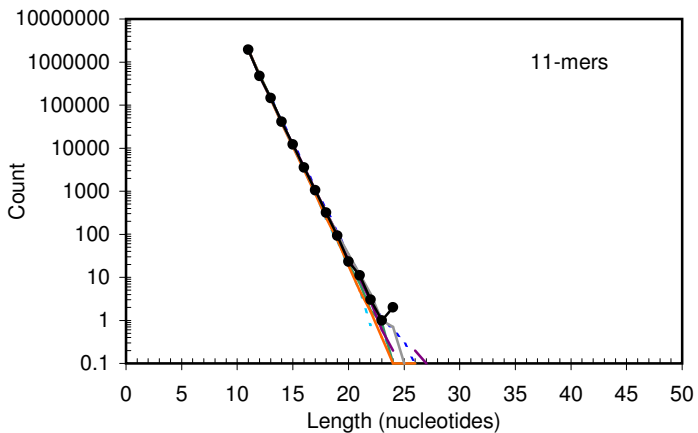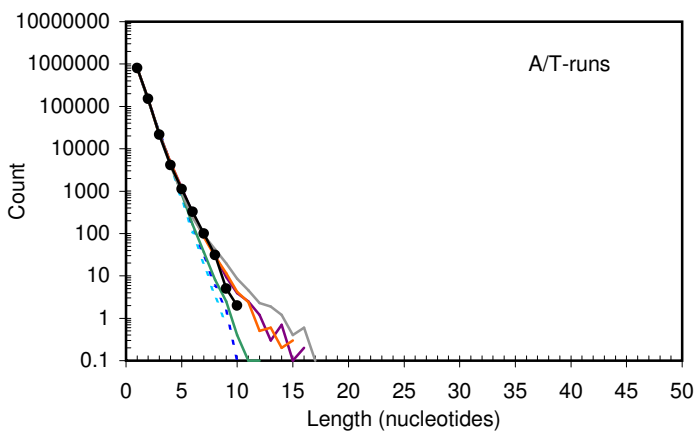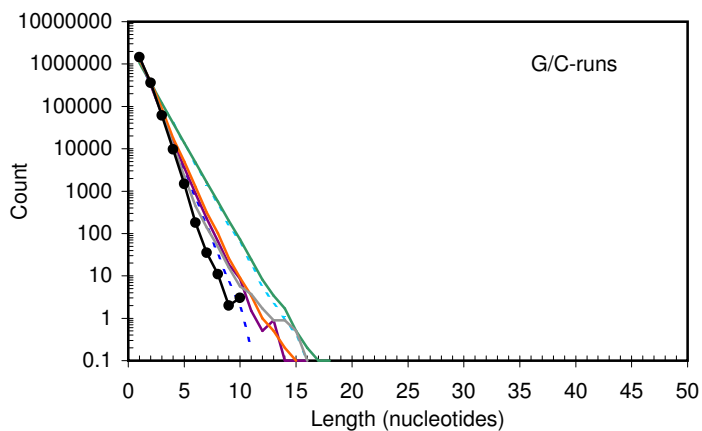

*Burkholderia thalandensis* E264  
chromosome I

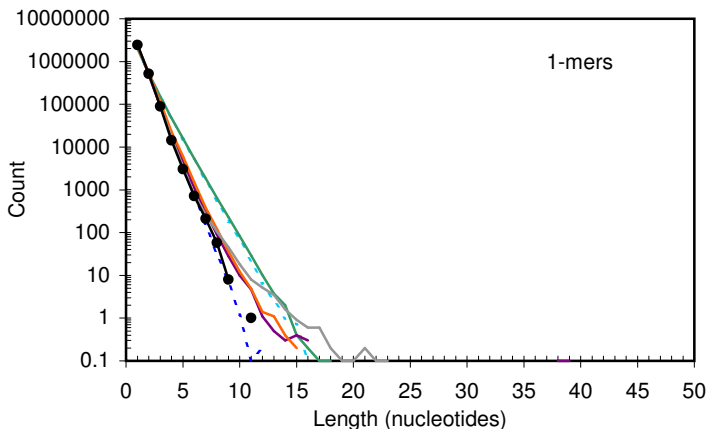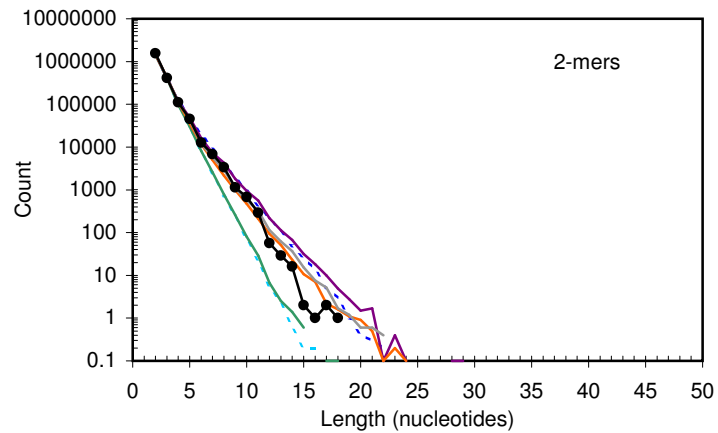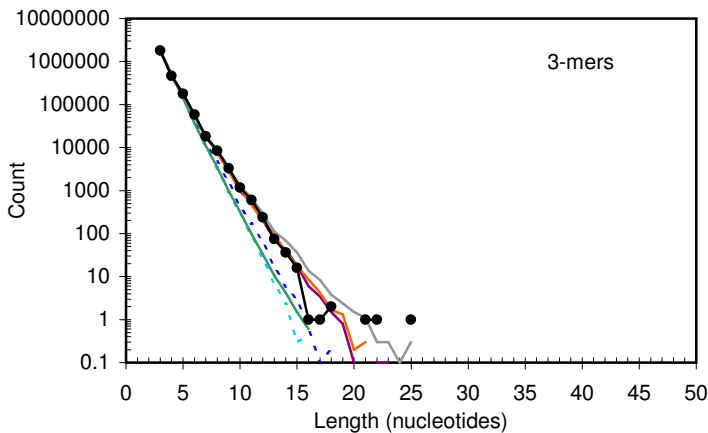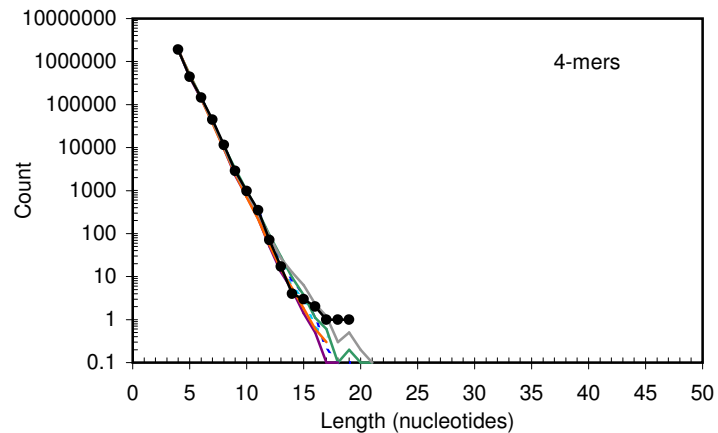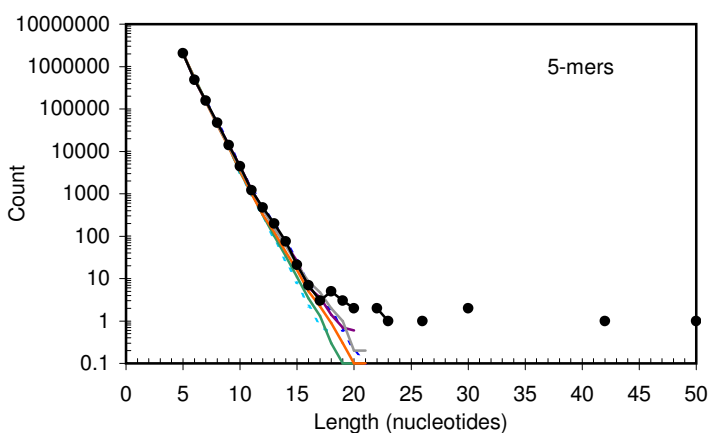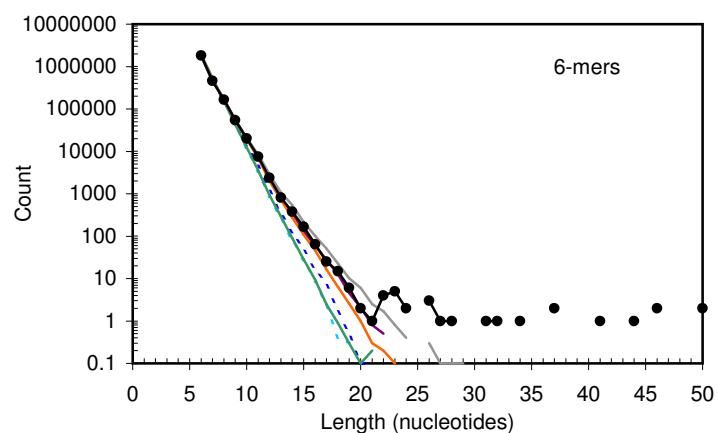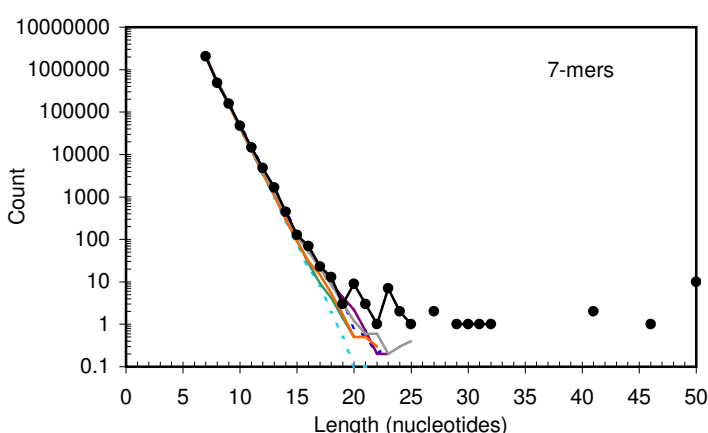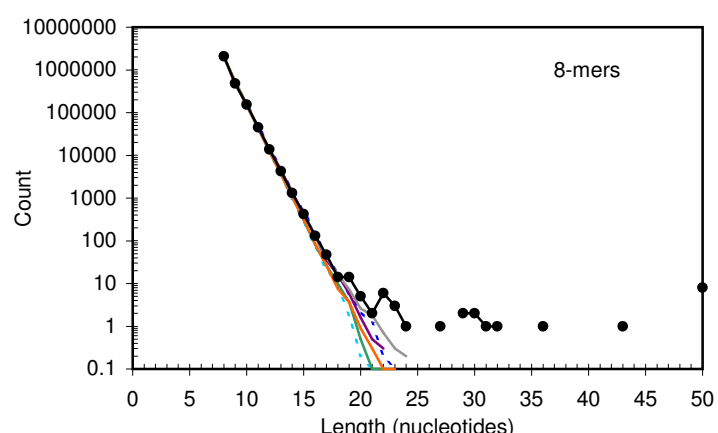

*Burkholderia thalandensis* E264  
chromosome I

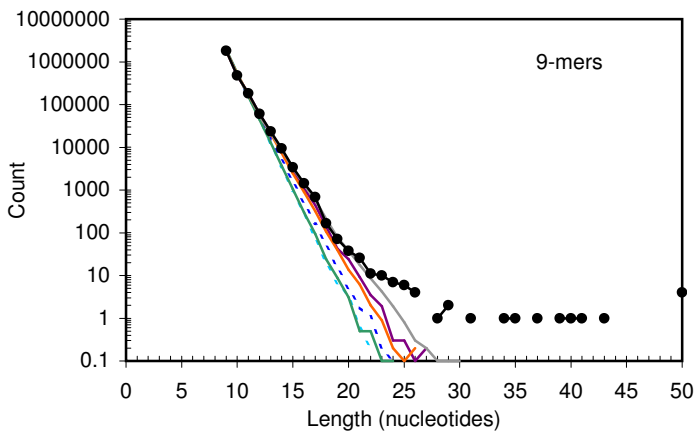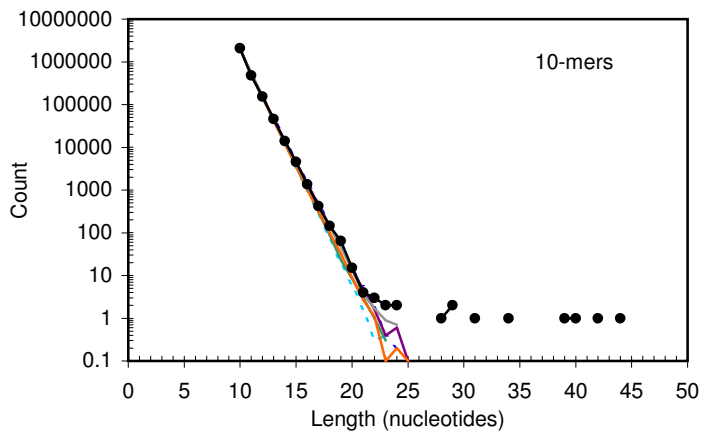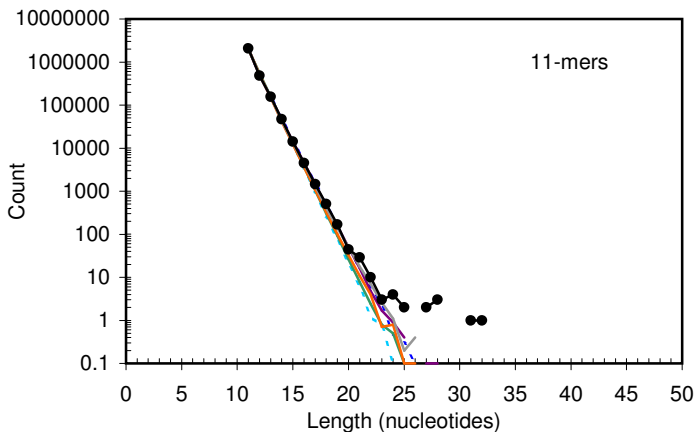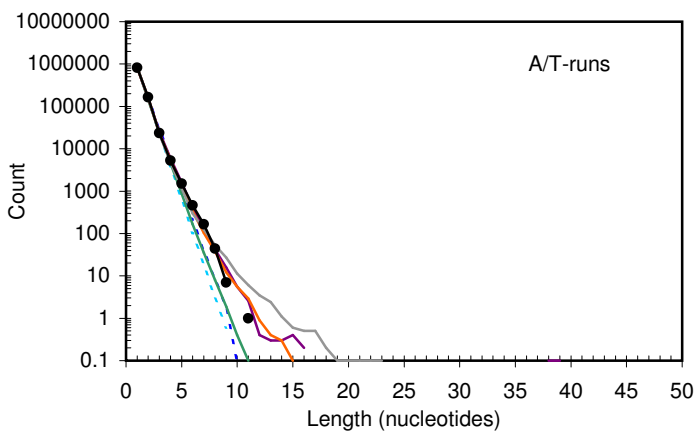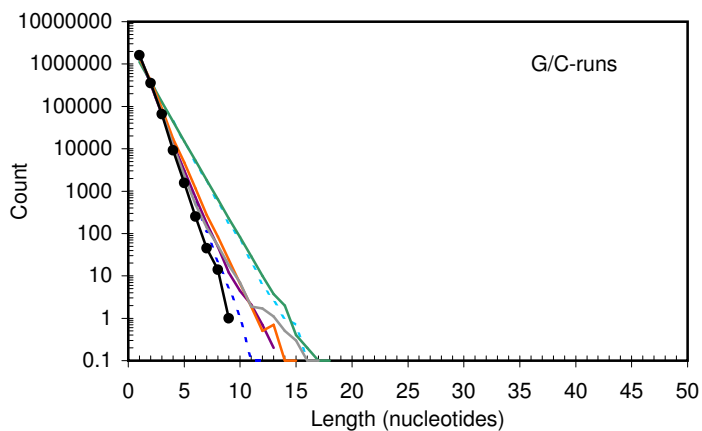

*Burkholderia thalandensis* E264  
chromosome II

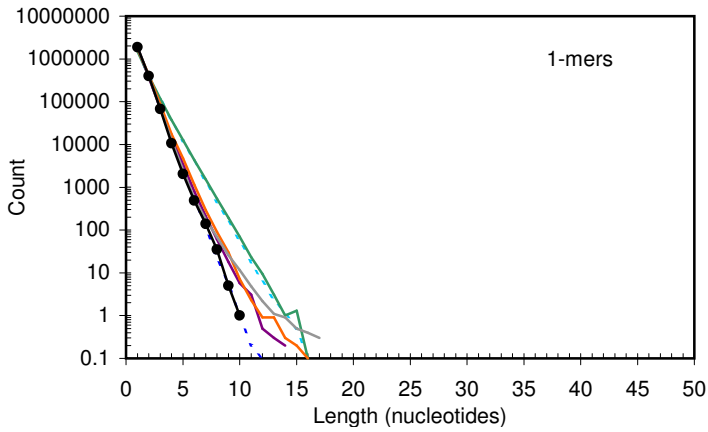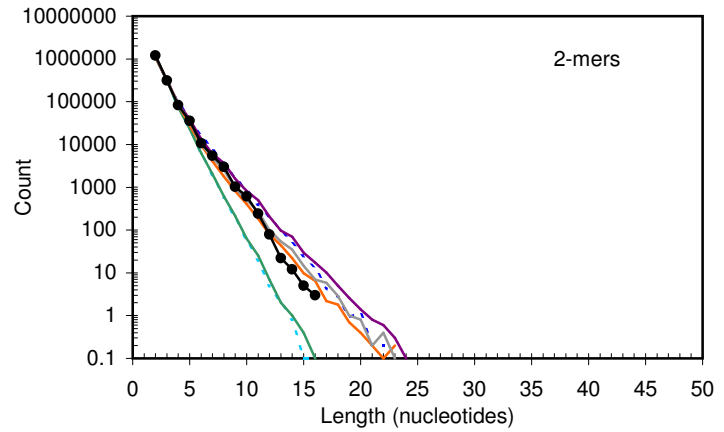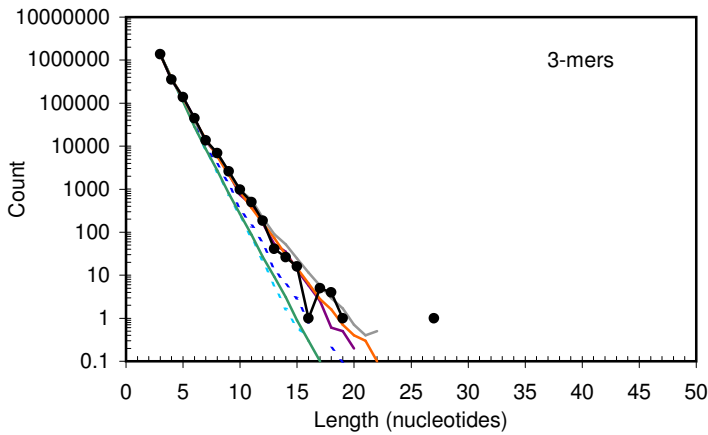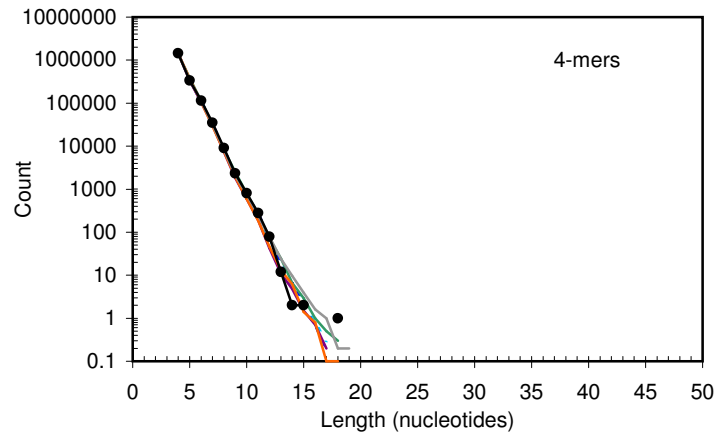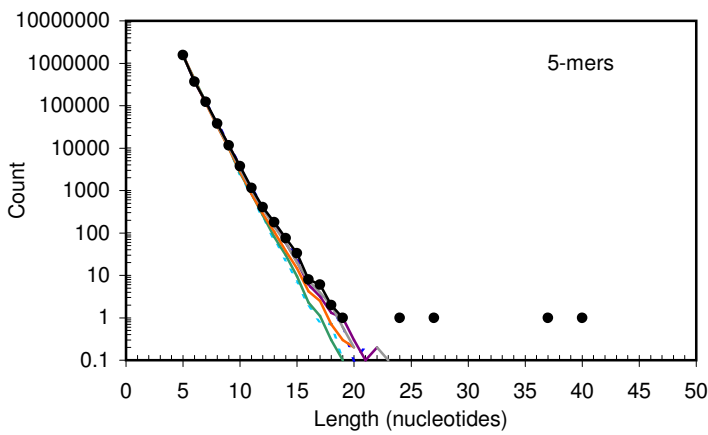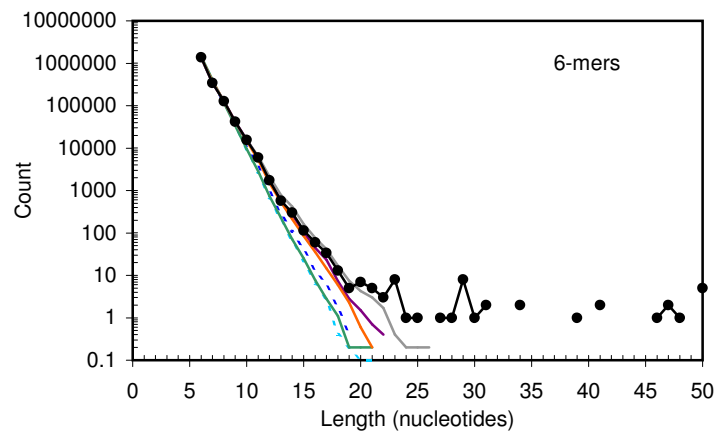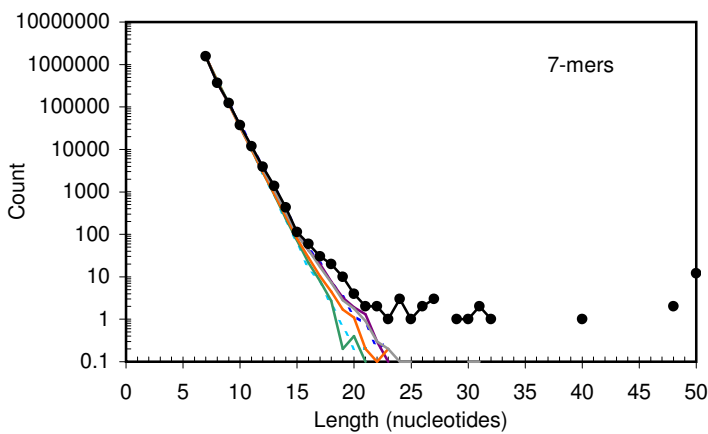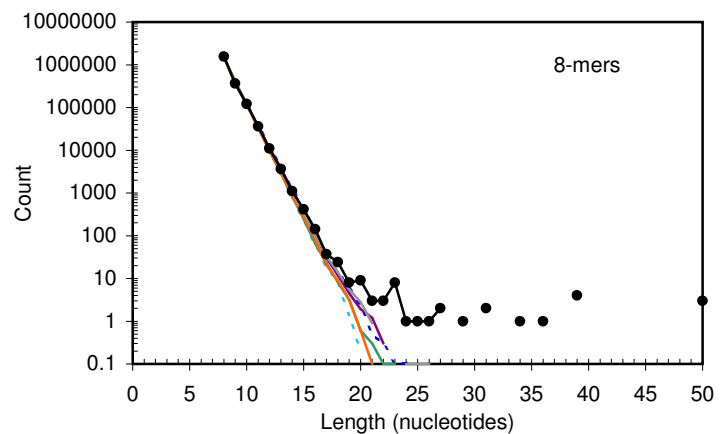

*Burkholderia thalandensis* E264  
chromosome II

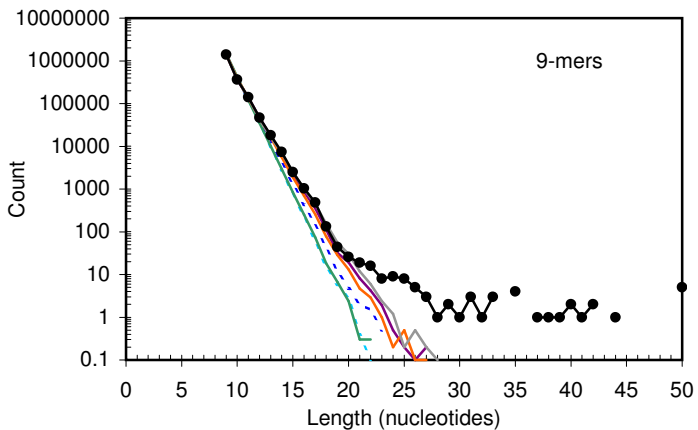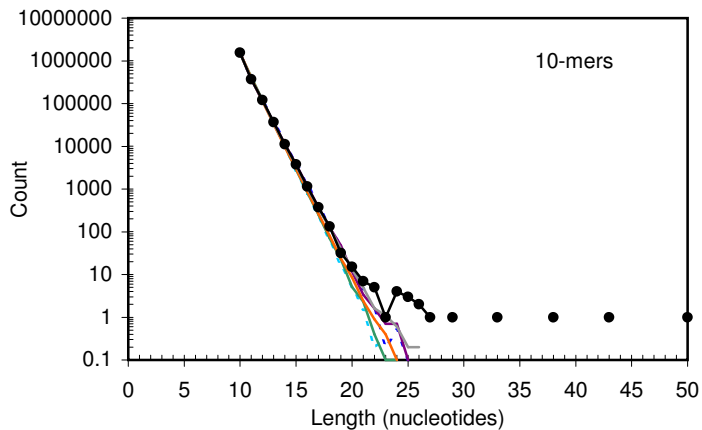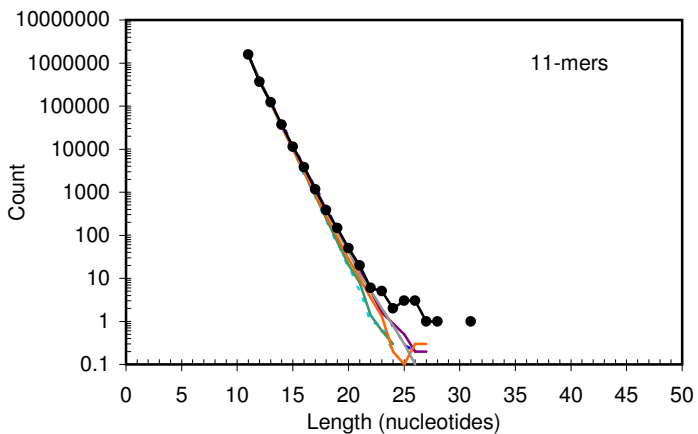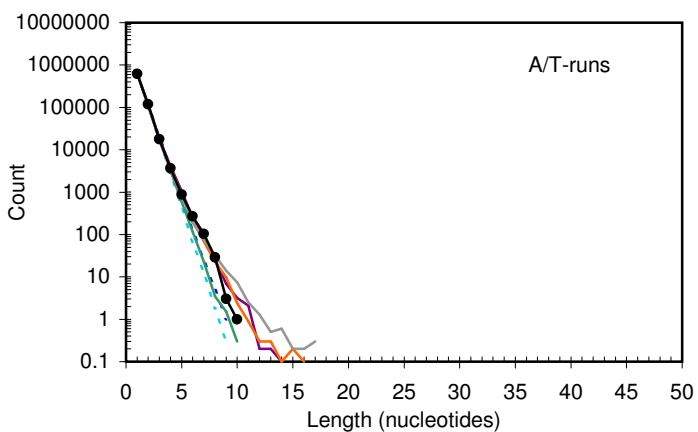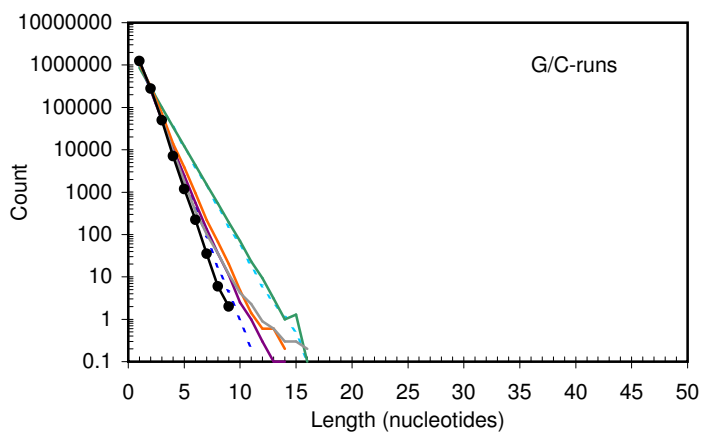

# *Burkholderia xenovorans* LB400 chromosome 1

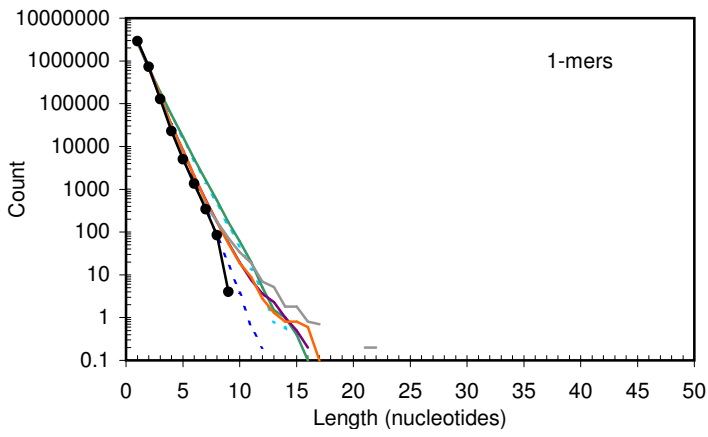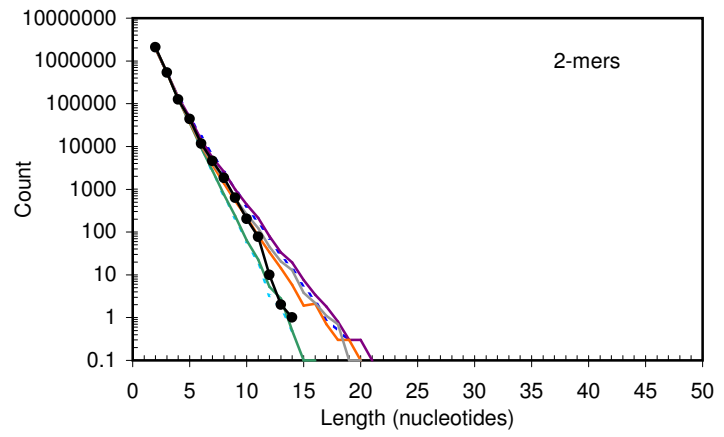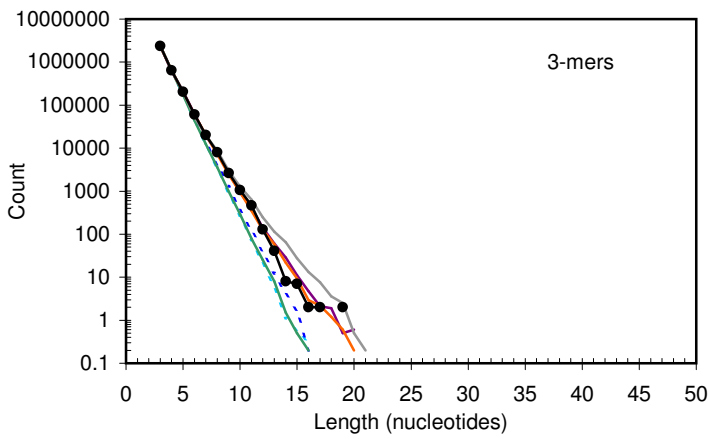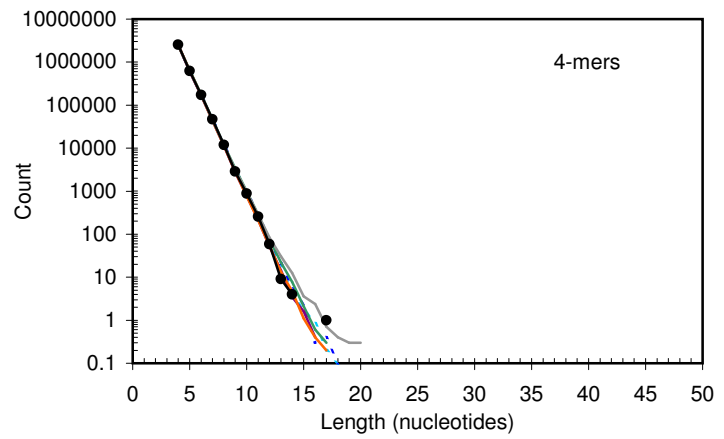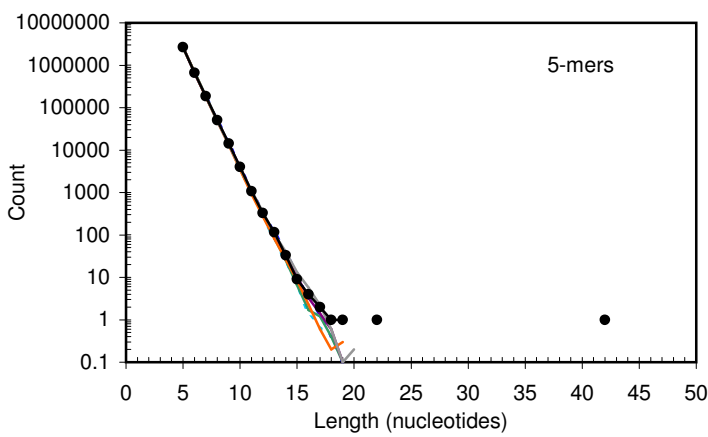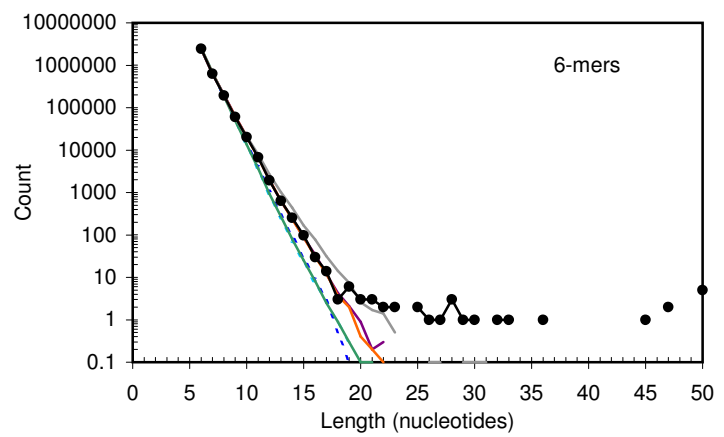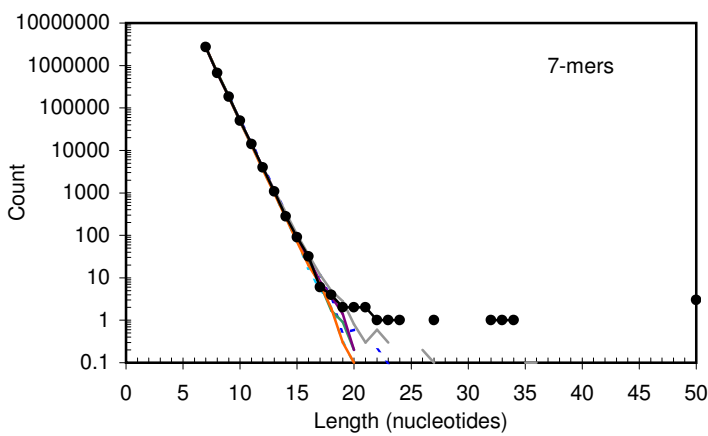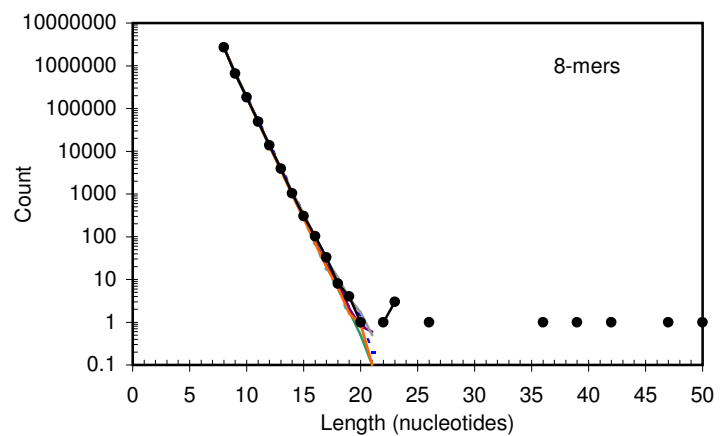

# *Burkholderia xenovorans* LB400 chromosome 1

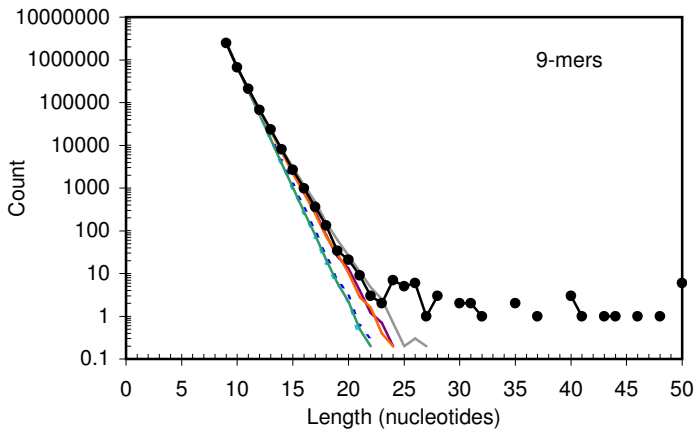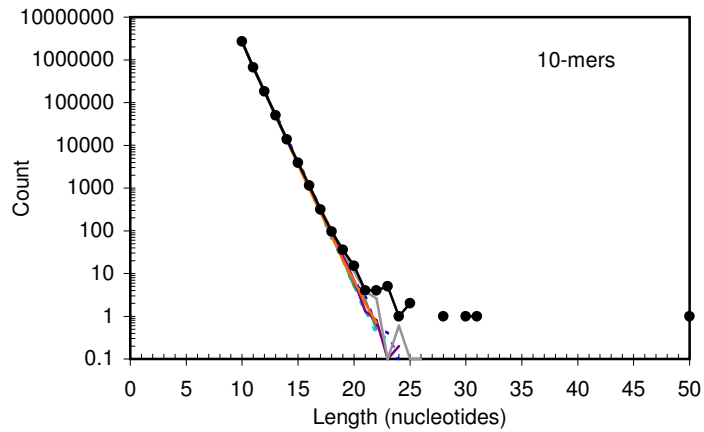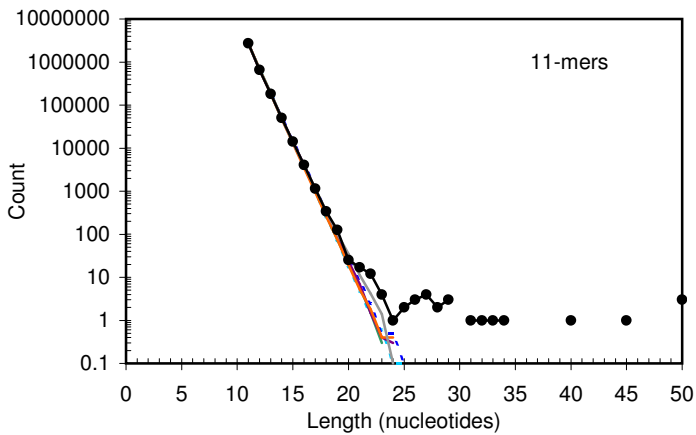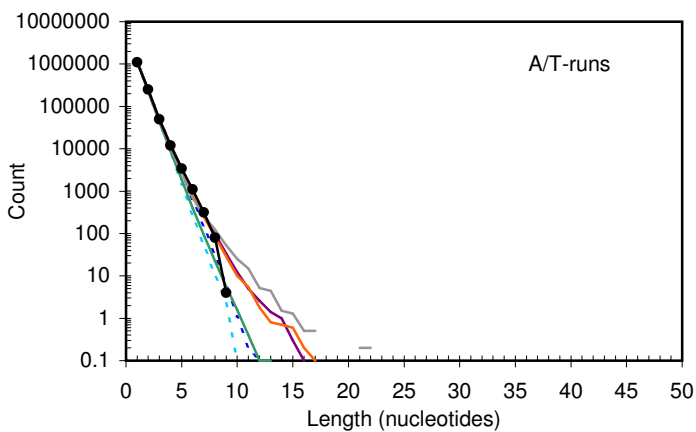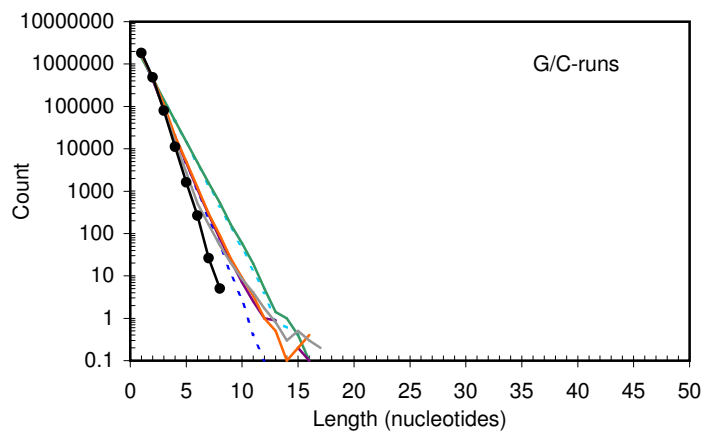



# *Burkholderia xenovorans* LB400 chromosome 2

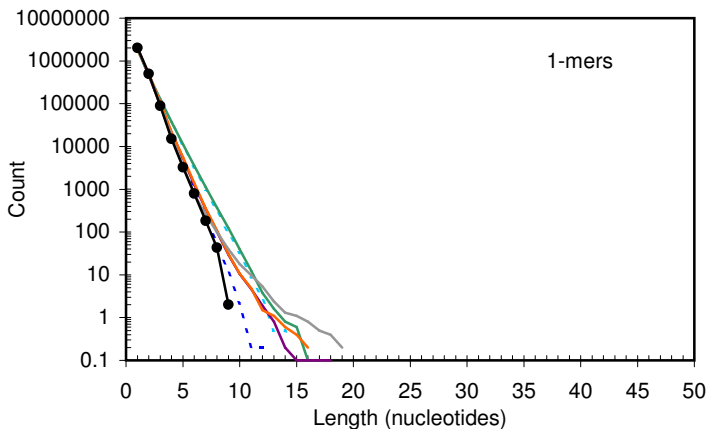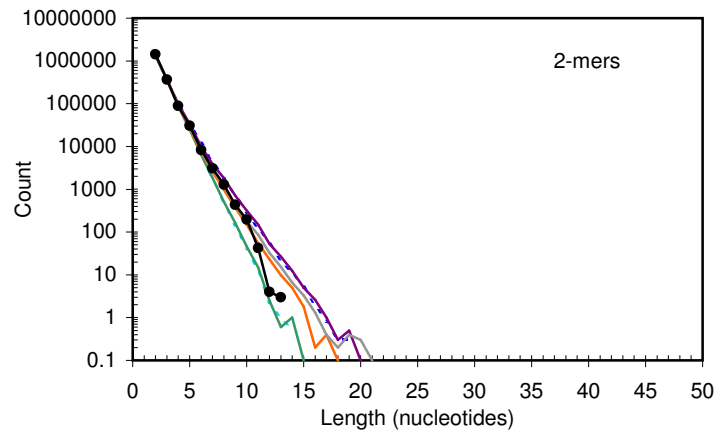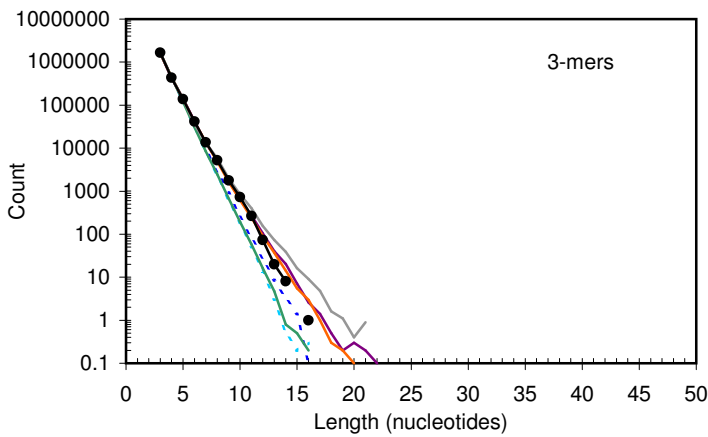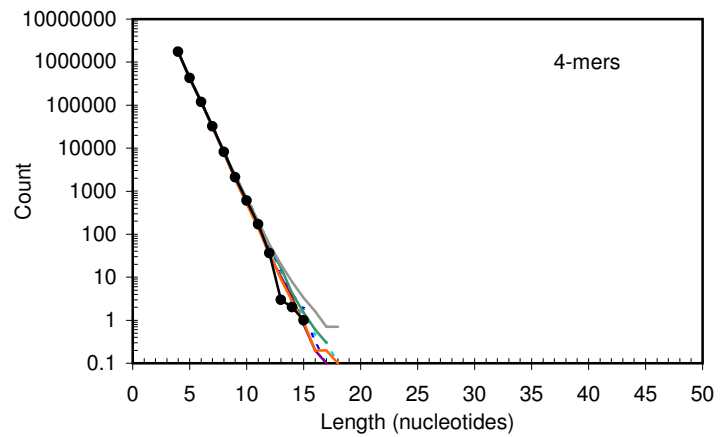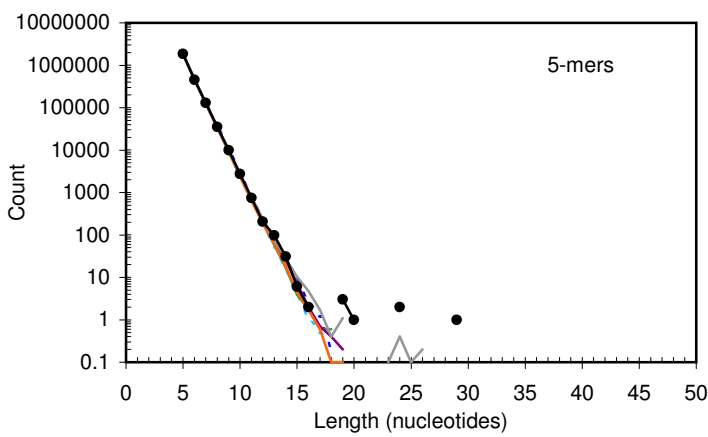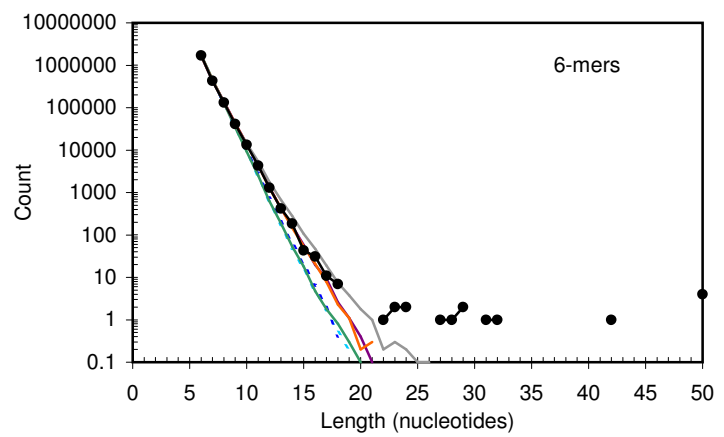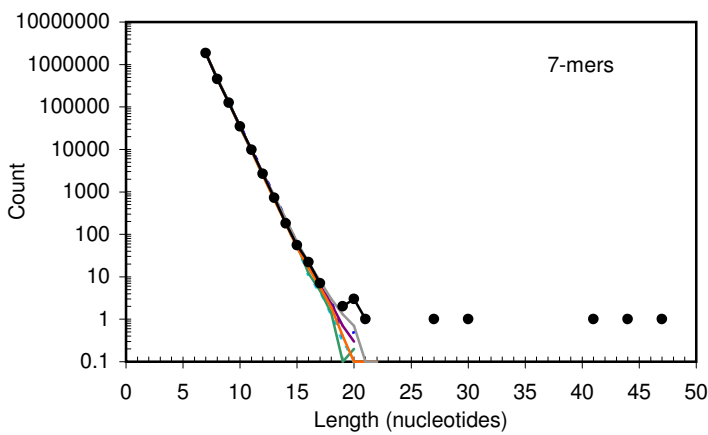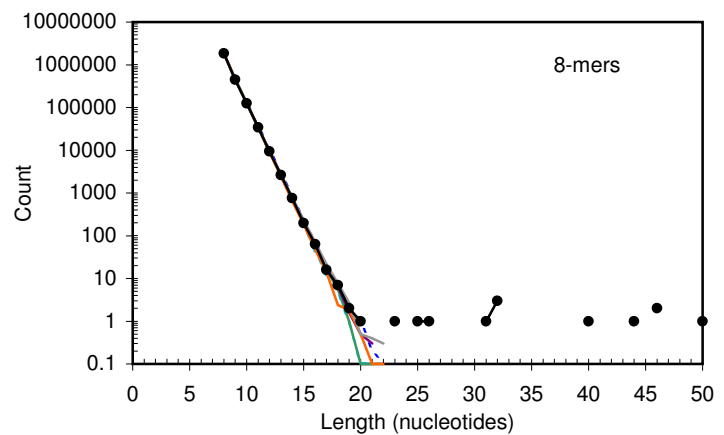

# *Burkholderia xenovorans* LB400 chromosome 2

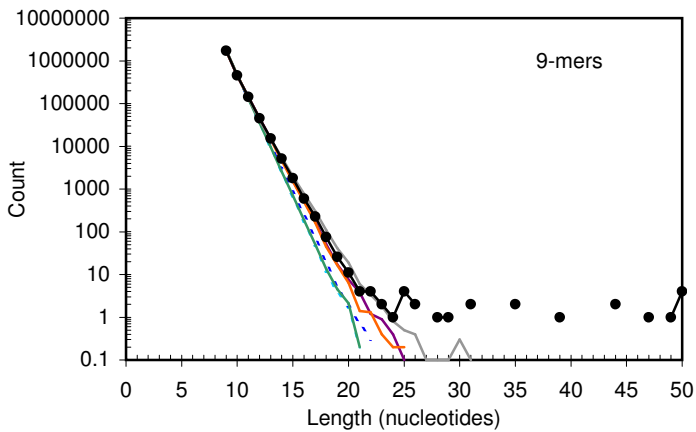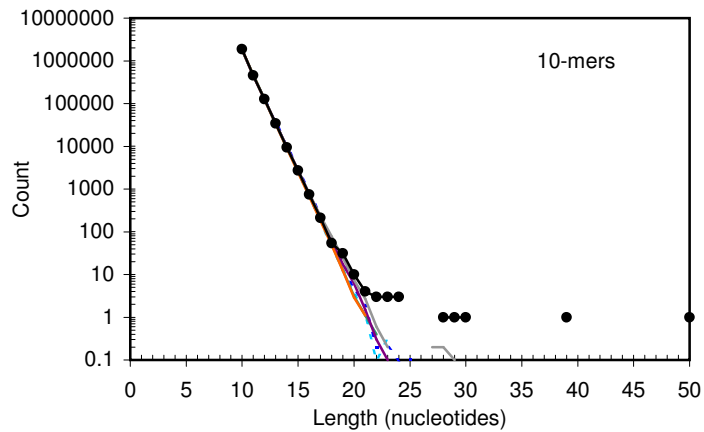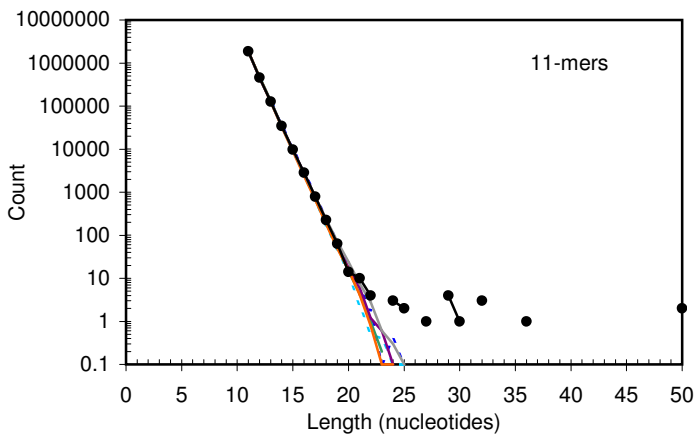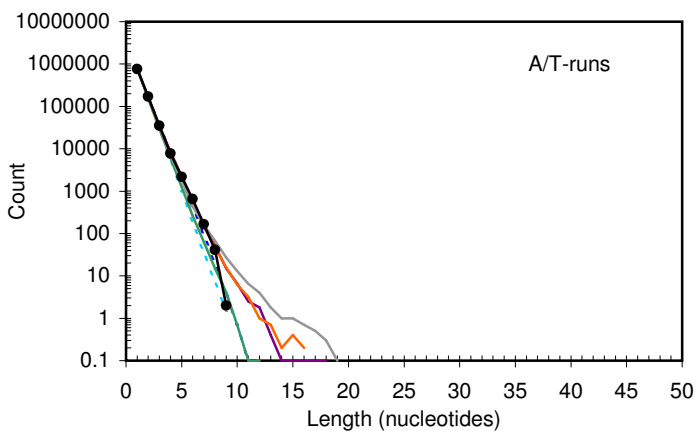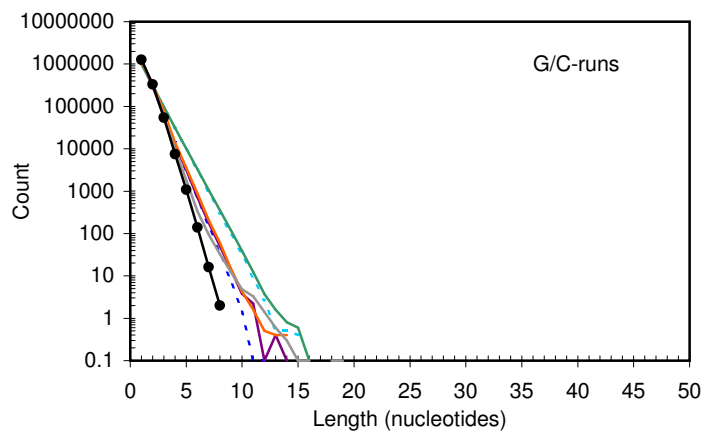

# *Chlamydia muridarum* Nigg

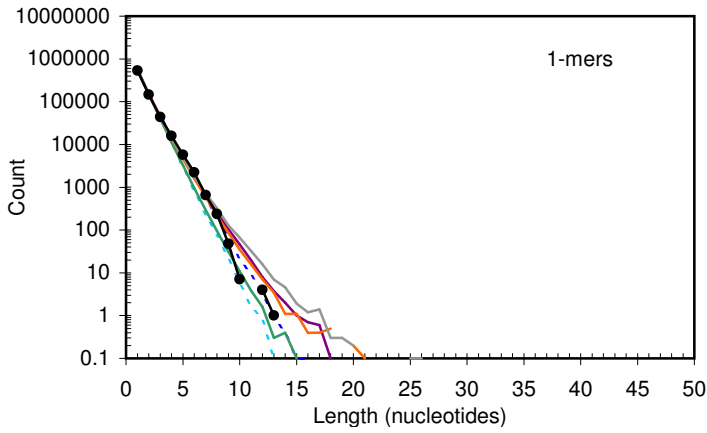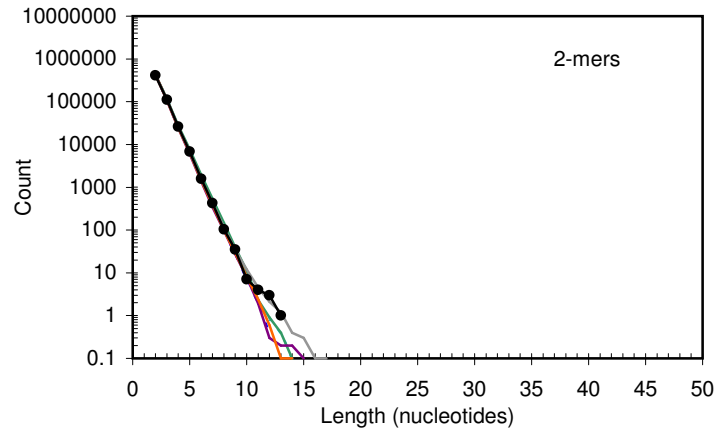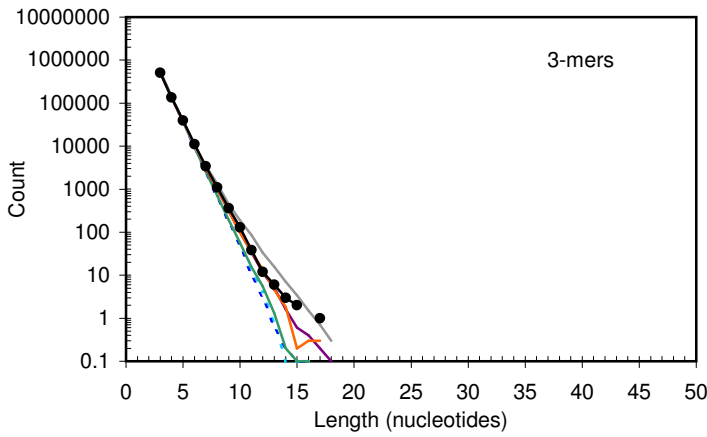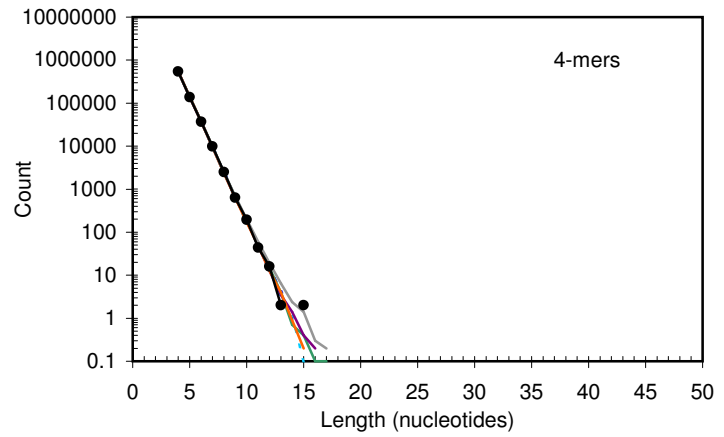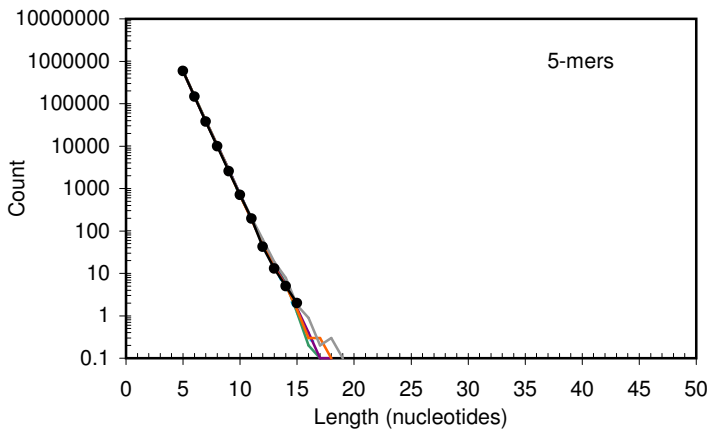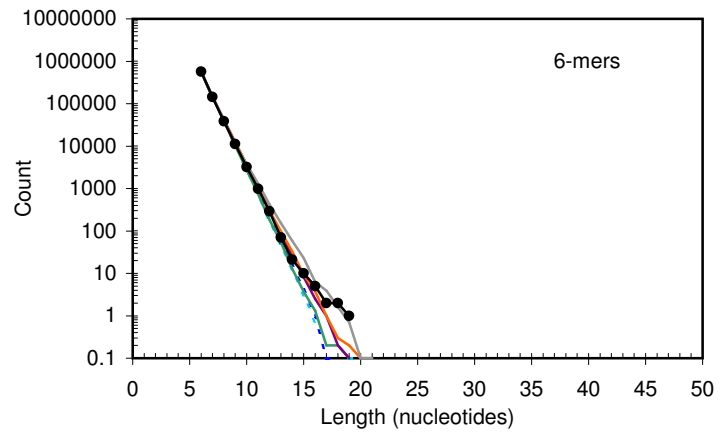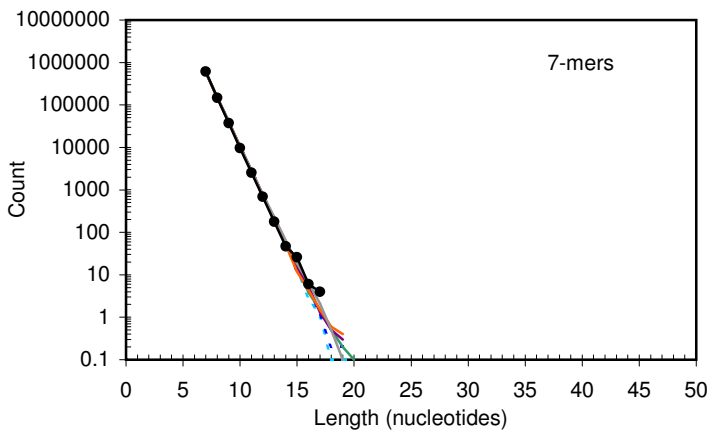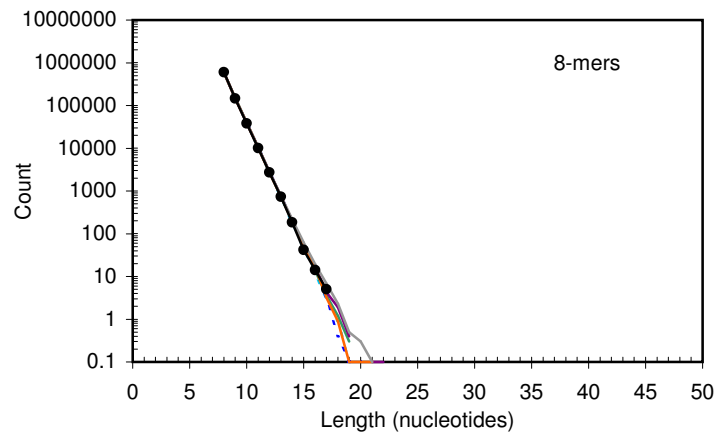

# *Chlamydia muridarum* Nigg

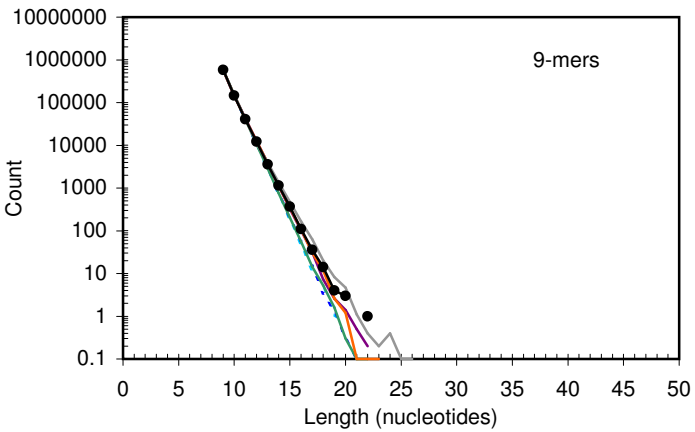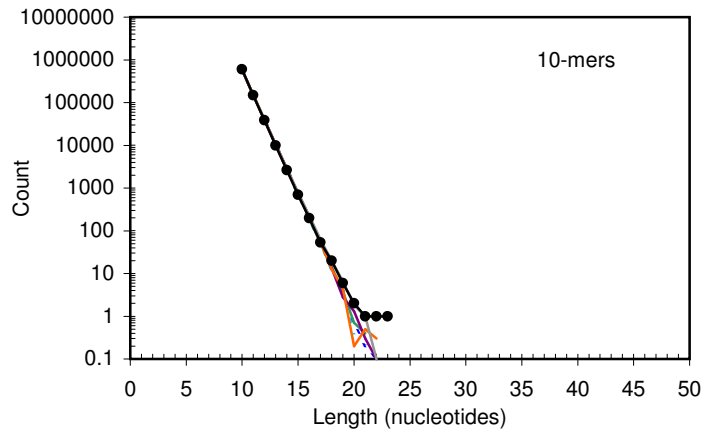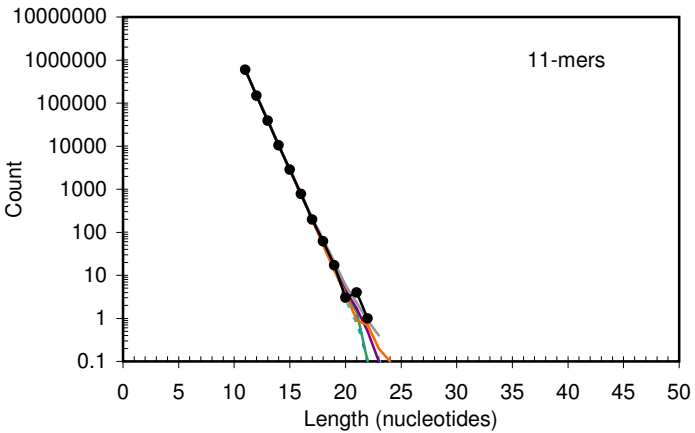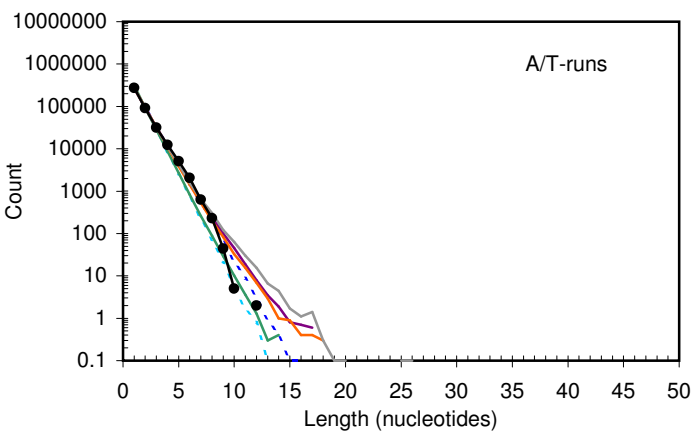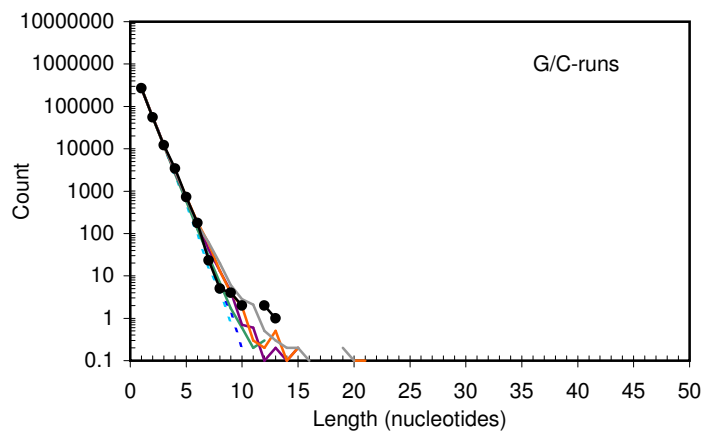

# *Chlamydia trachomatis* D-UW-3-CX

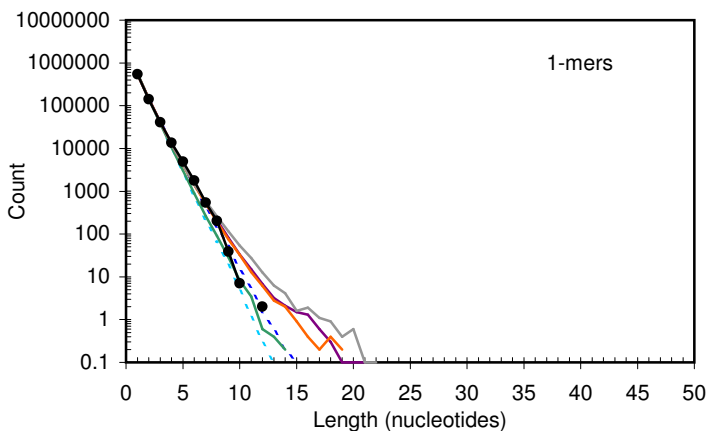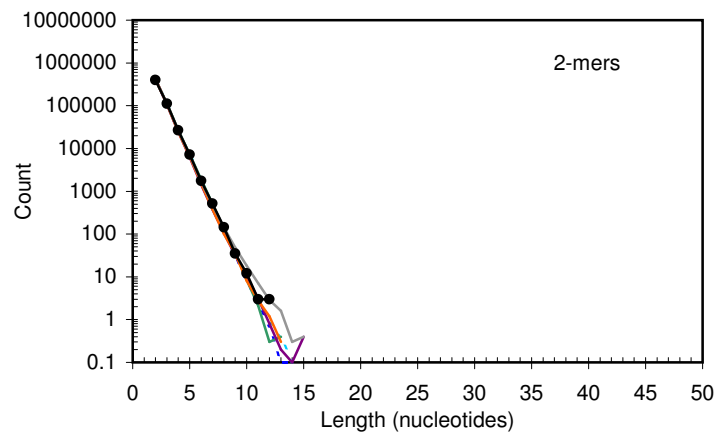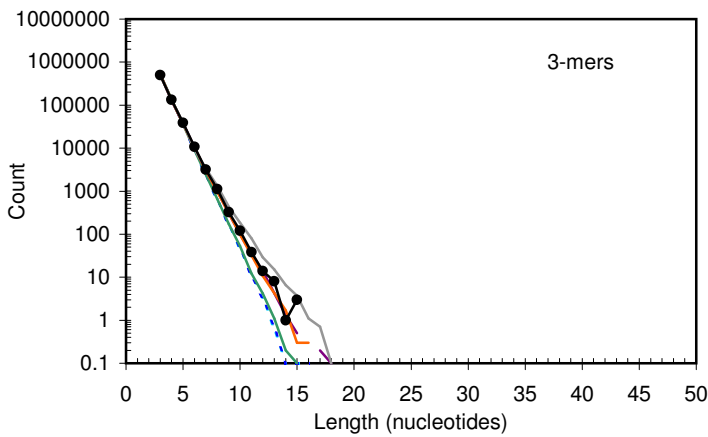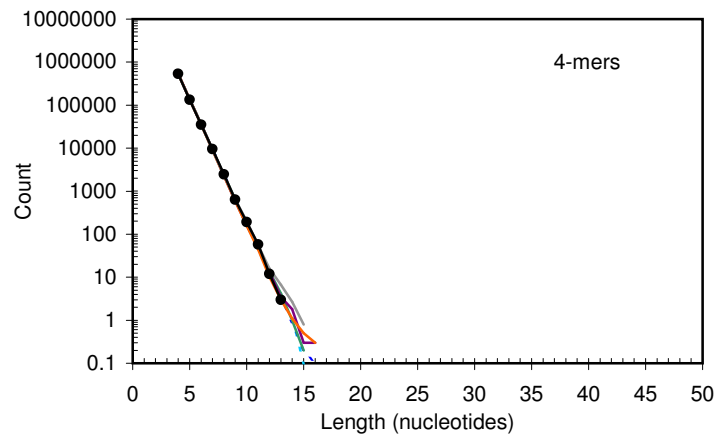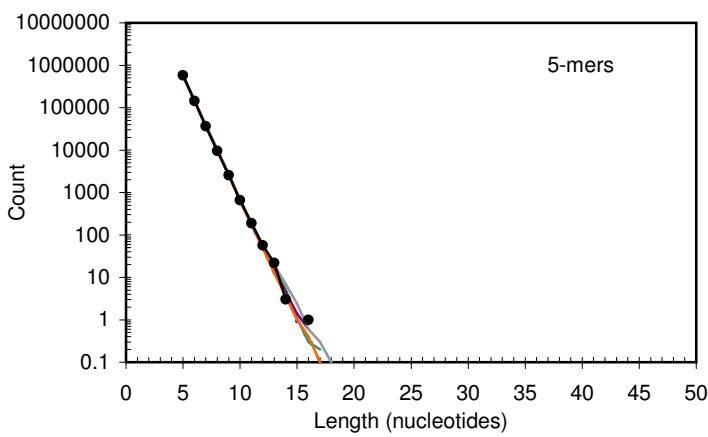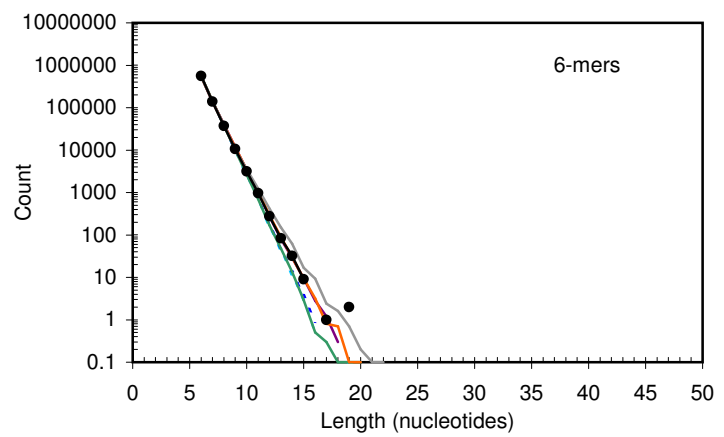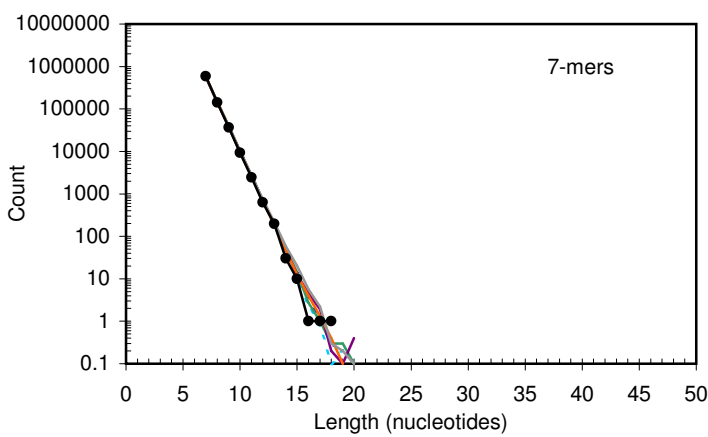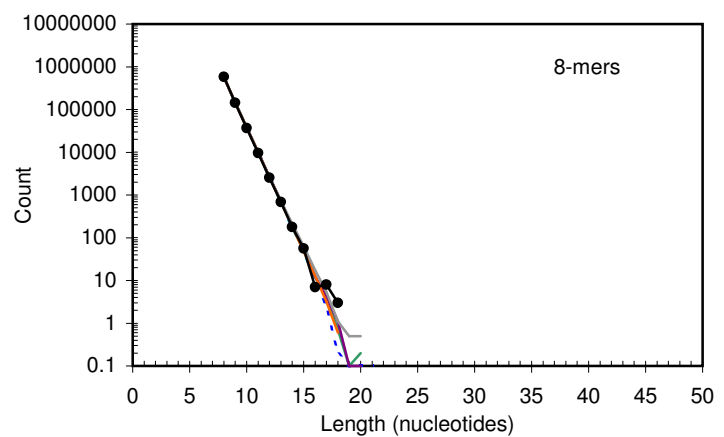

# *Chlamydia trachomatis* D-UW-3-CX

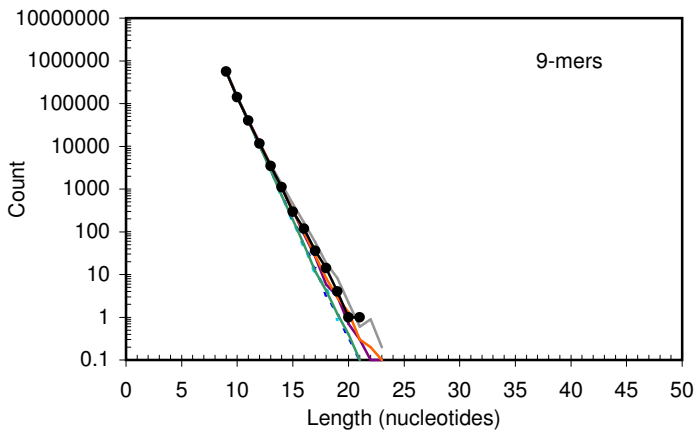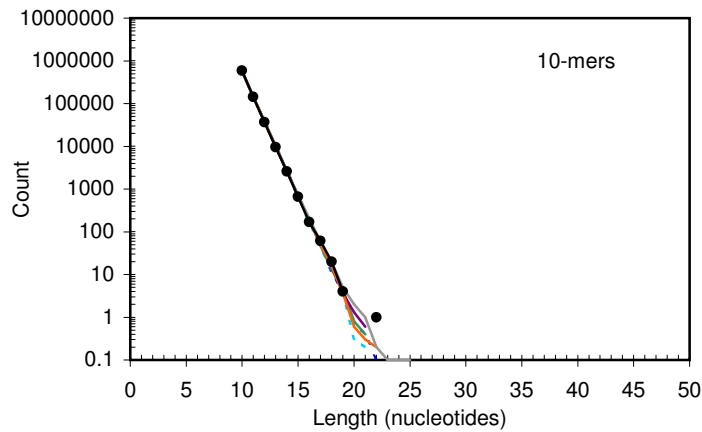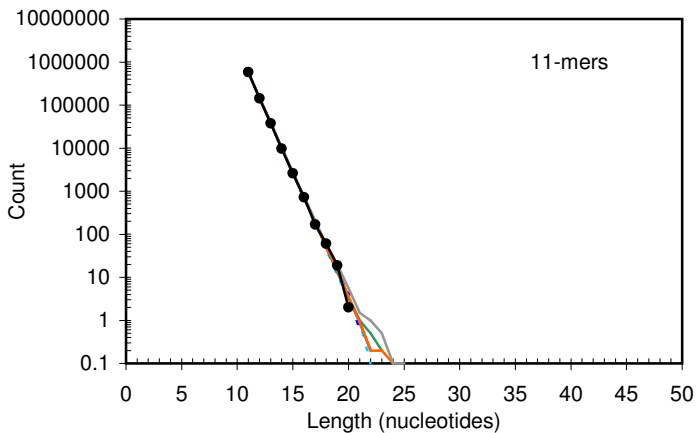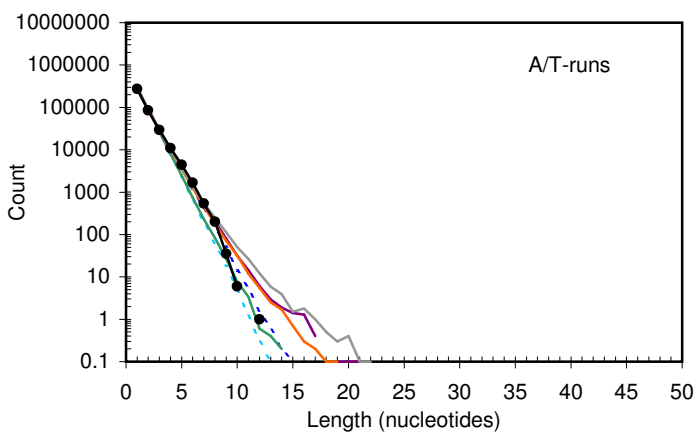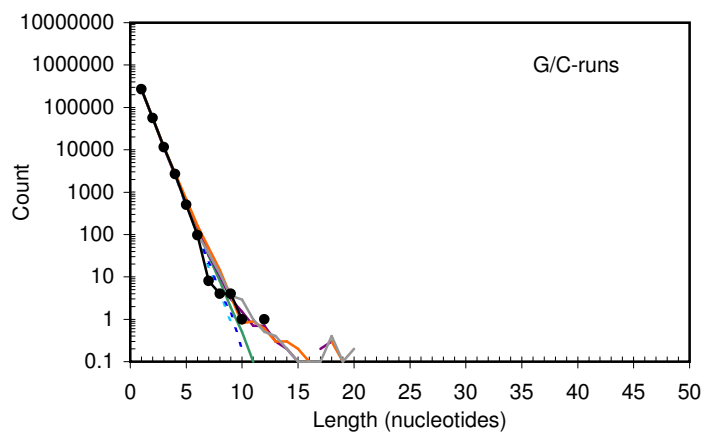

# *Chlamydomophila pneumoniae* AR39

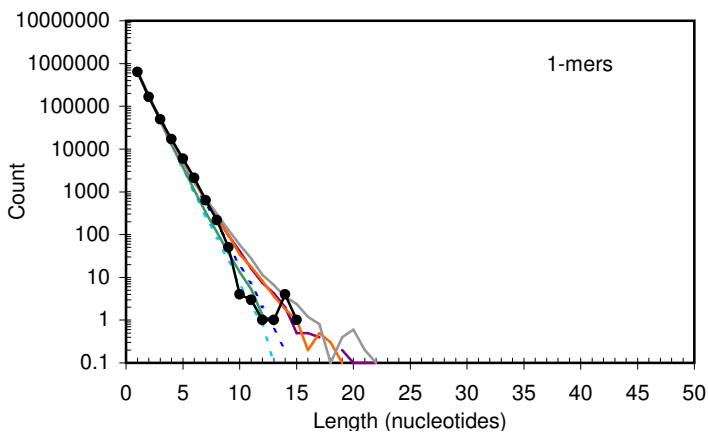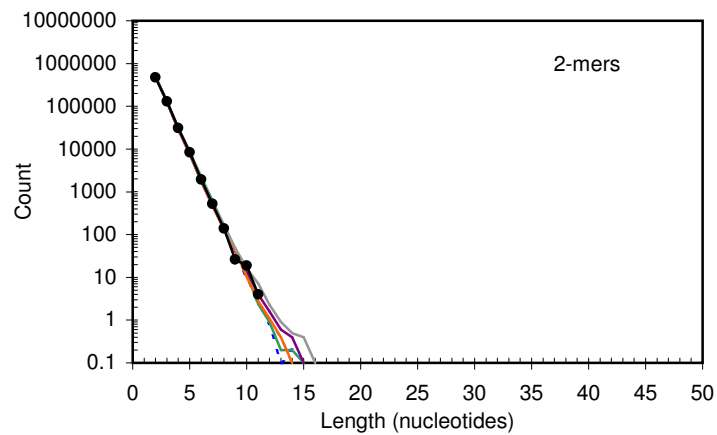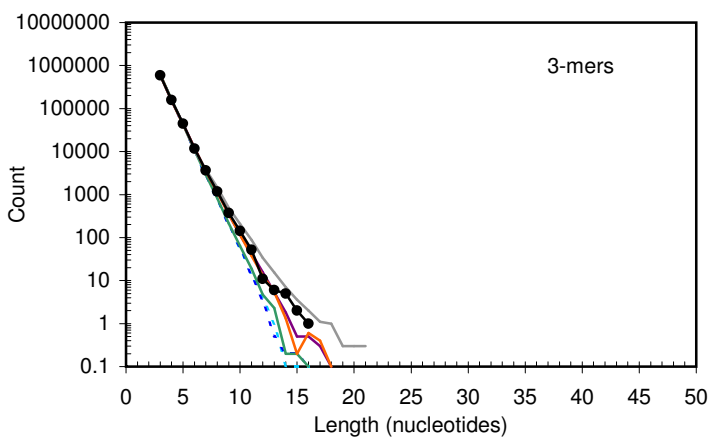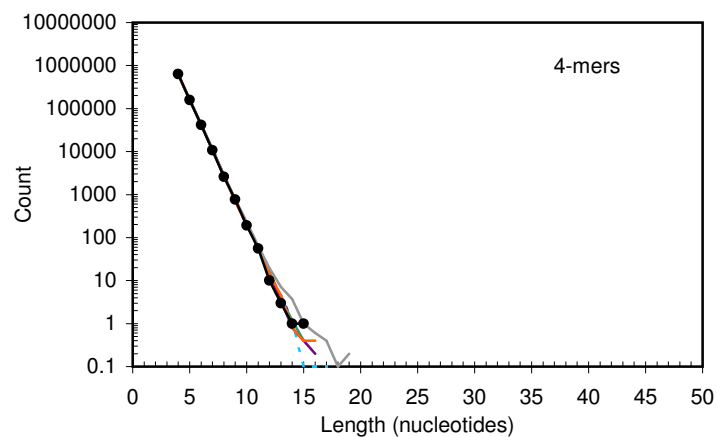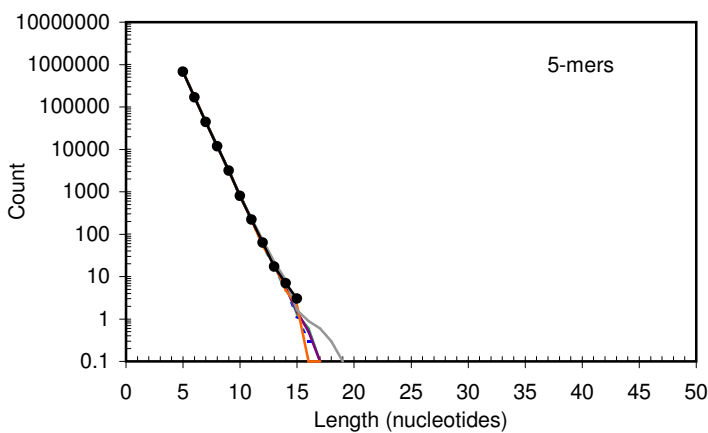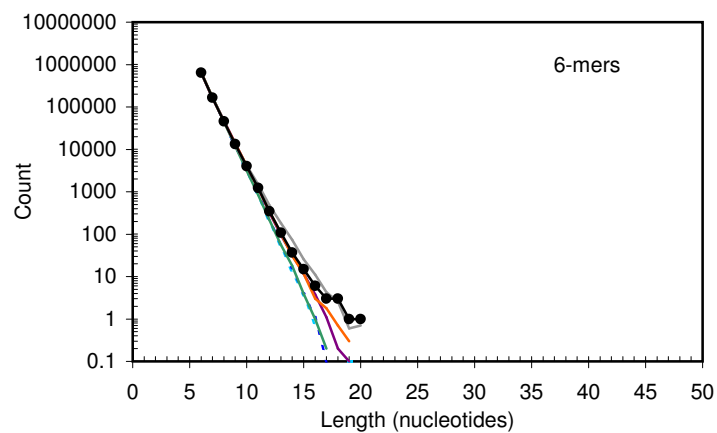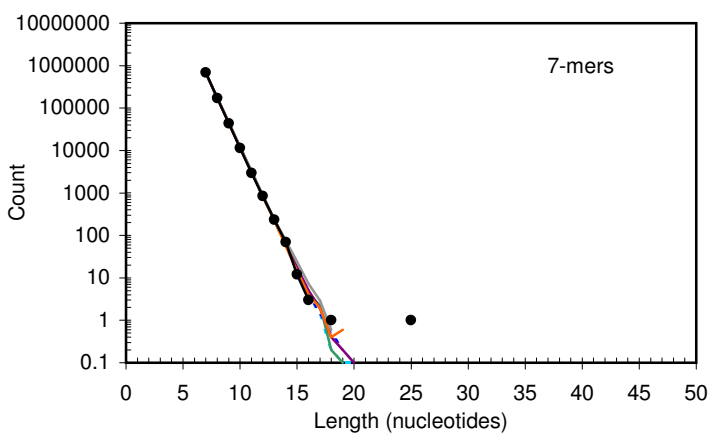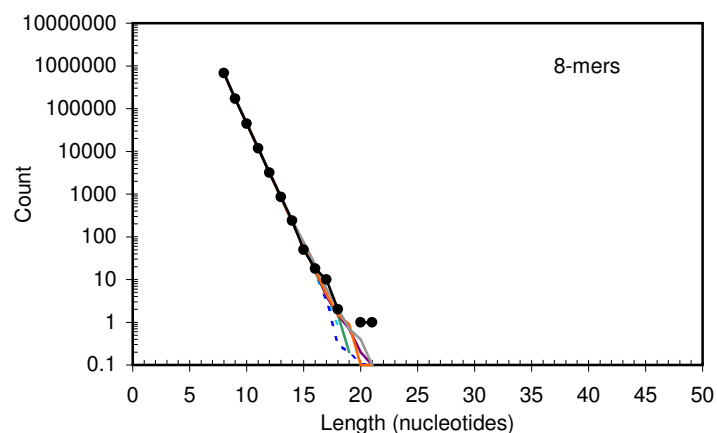

# *Chlamydomophila pneumoniae* AR39

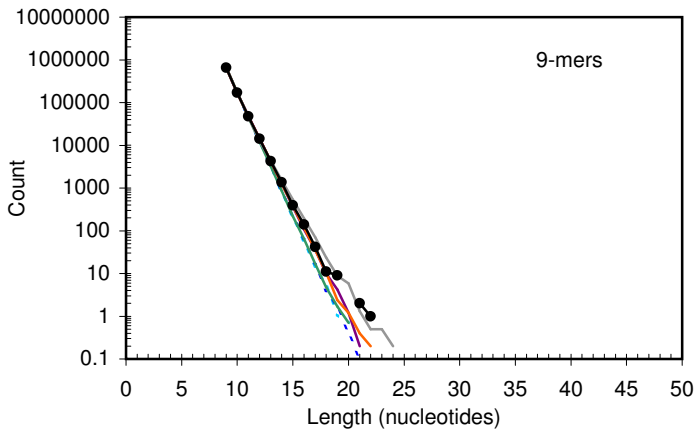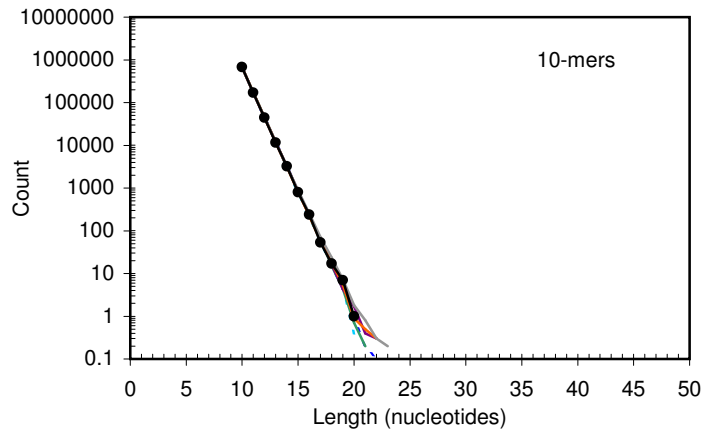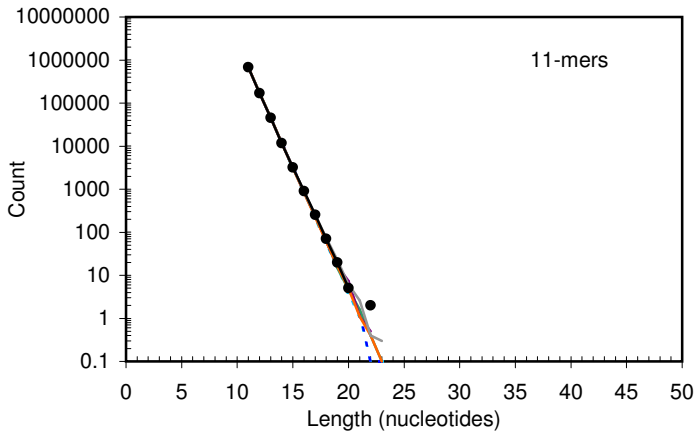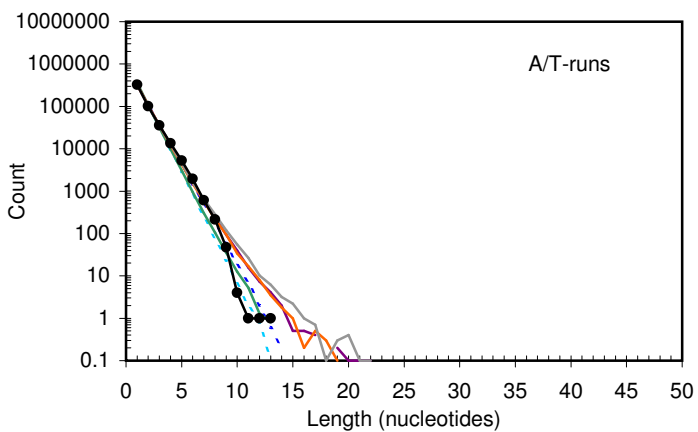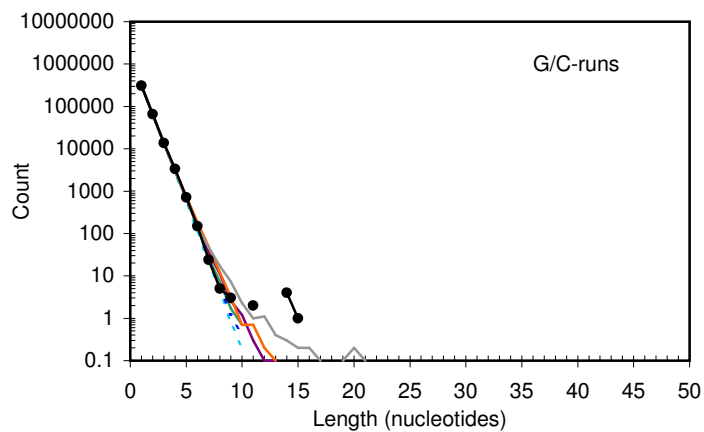



# *Desulfovibrio desulfuricans* G20

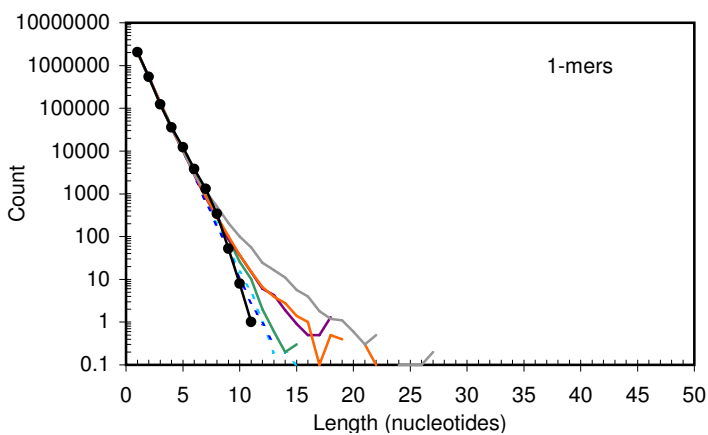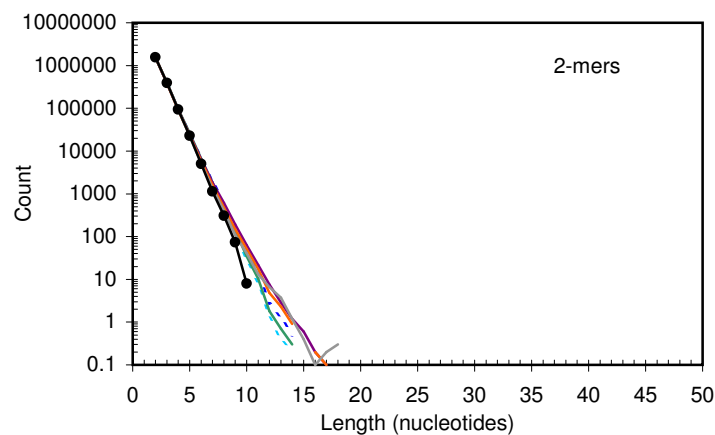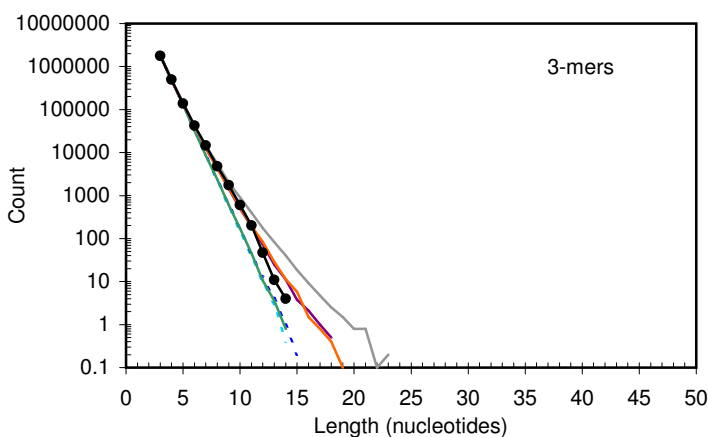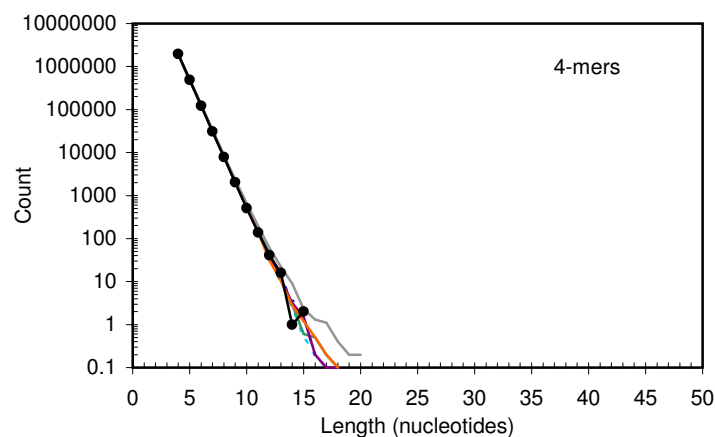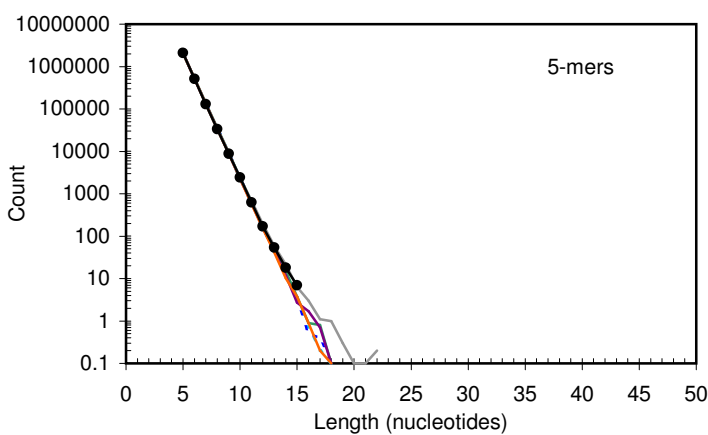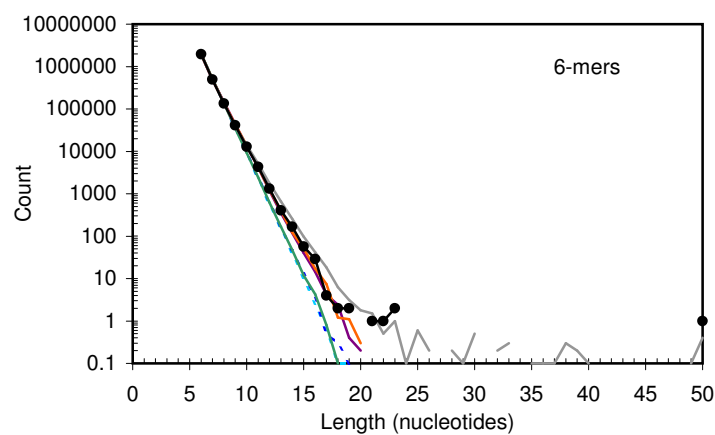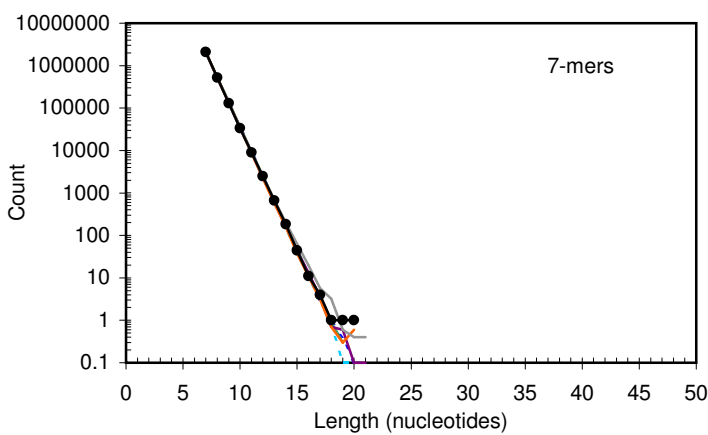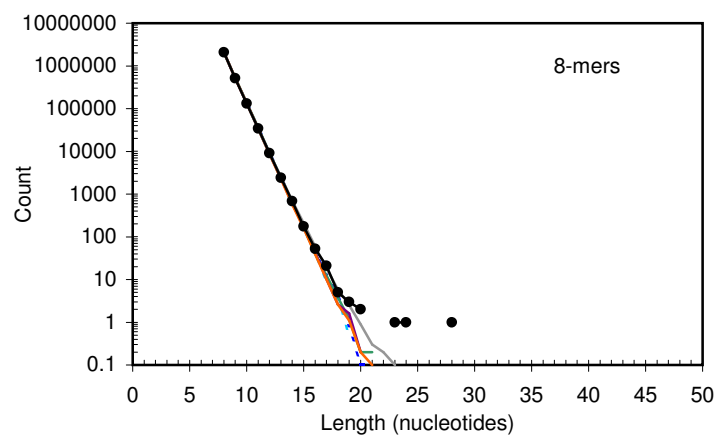

# *Desulfovibrio desulfuricans* G20

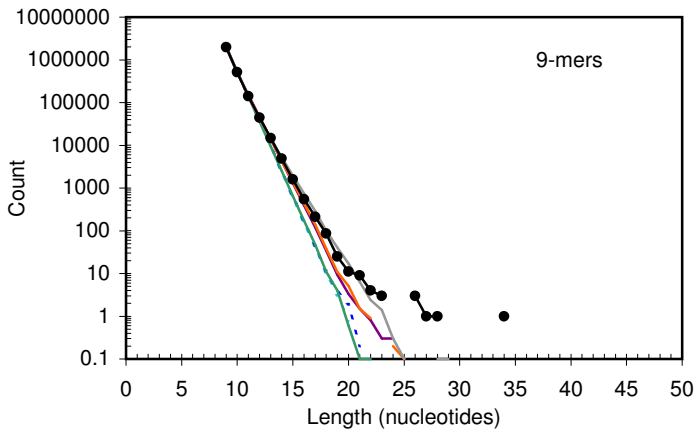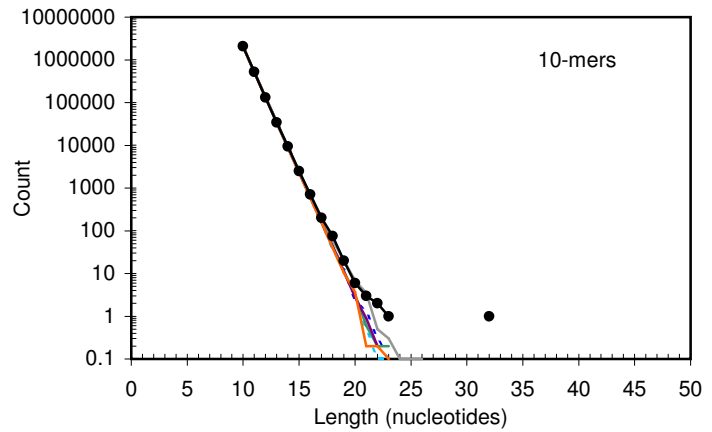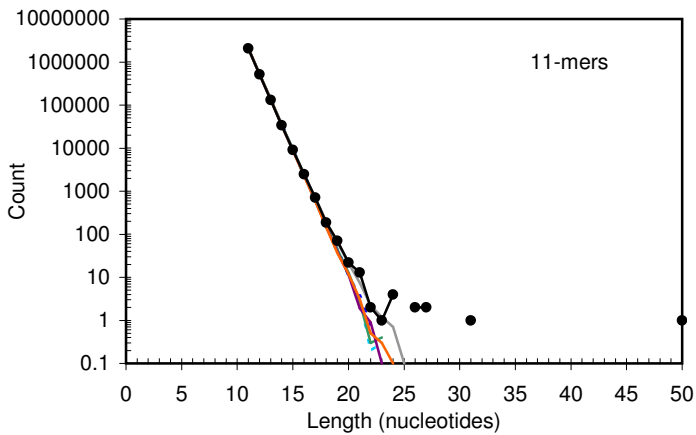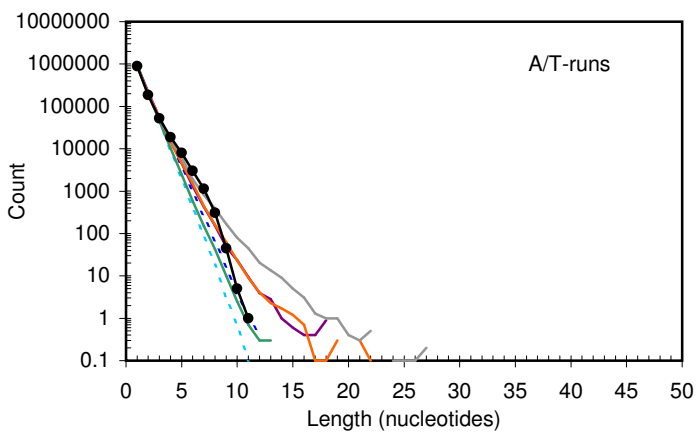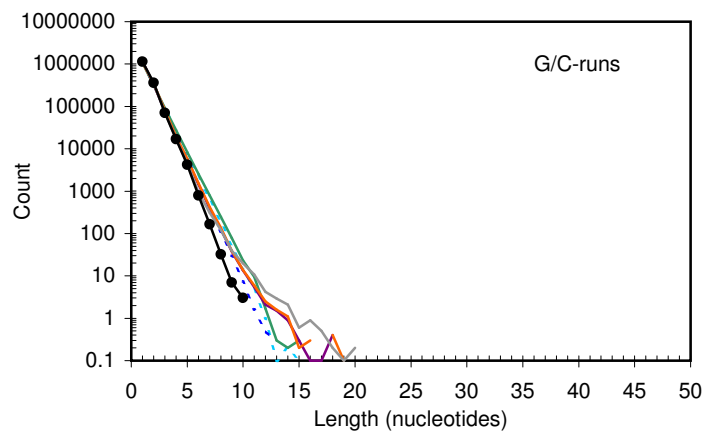

*Desulfovibrio vulgaris* subsp. *Vulgaris*  
str. Hildenborough

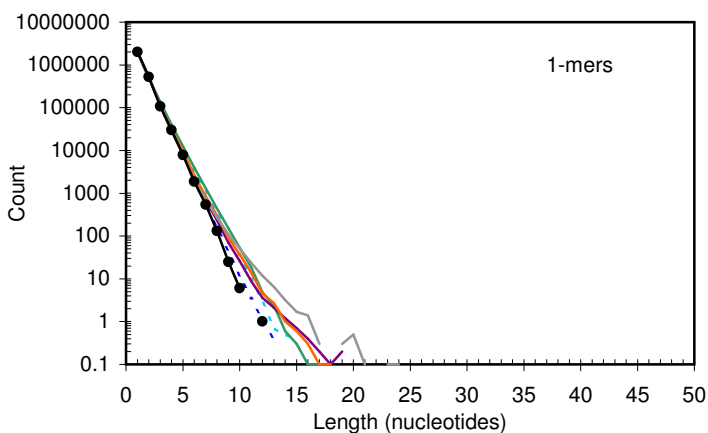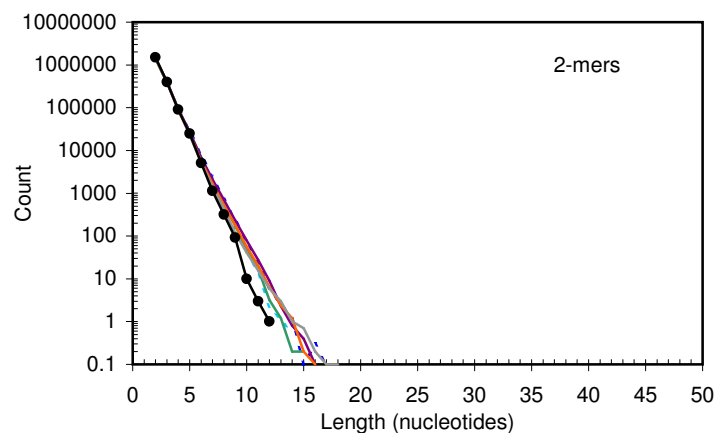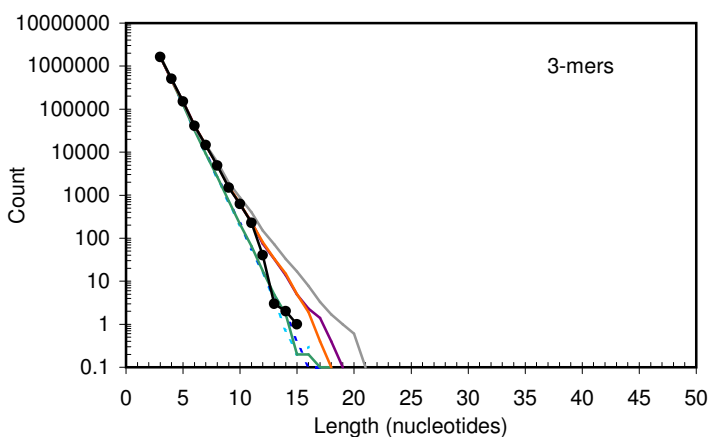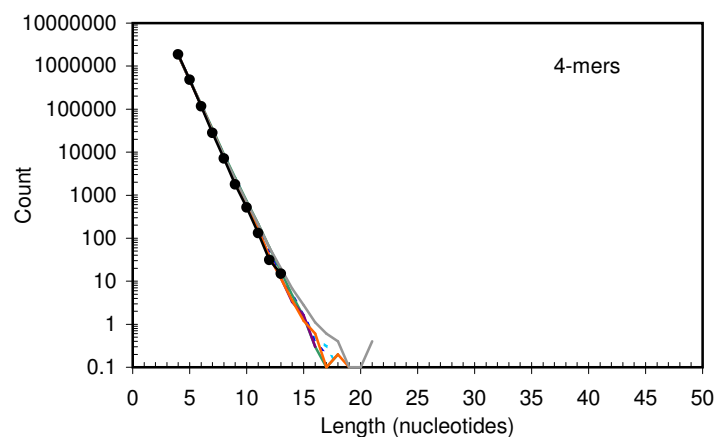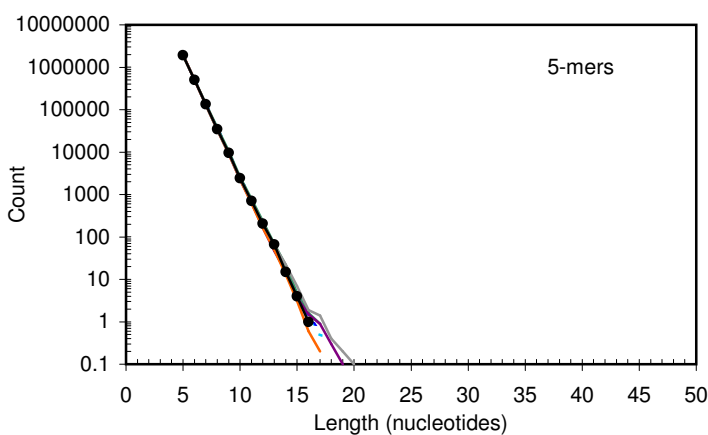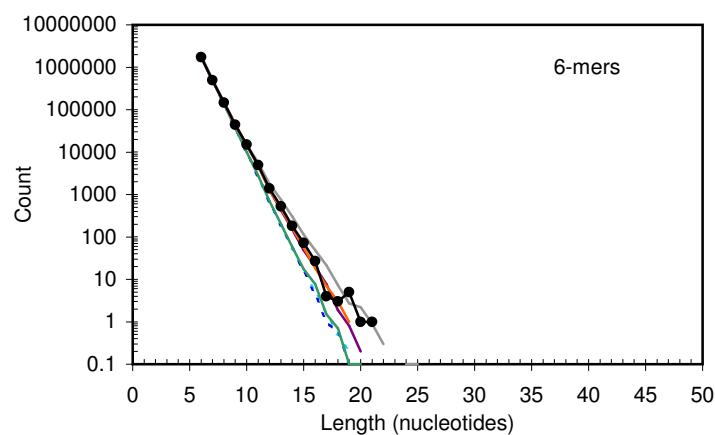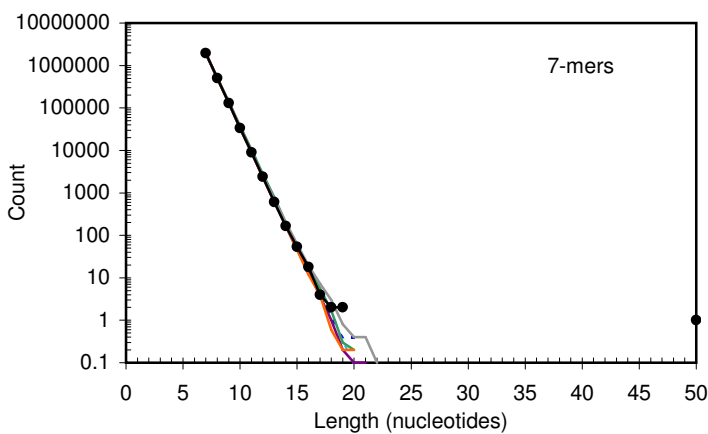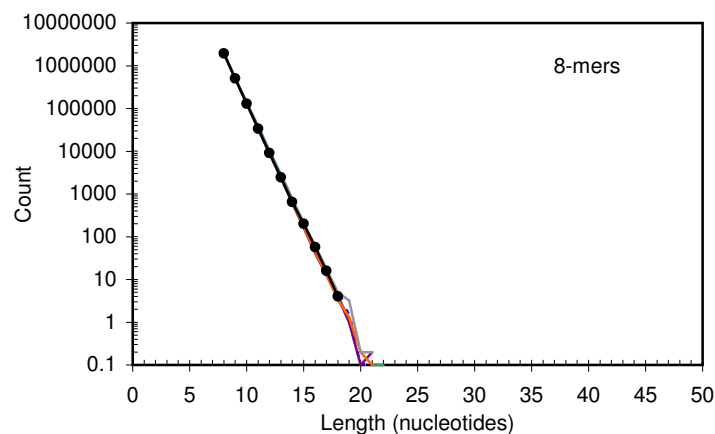

*Desulfovibrio vulgaris* subsp. *Vulgaris*  
str. Hildenborough

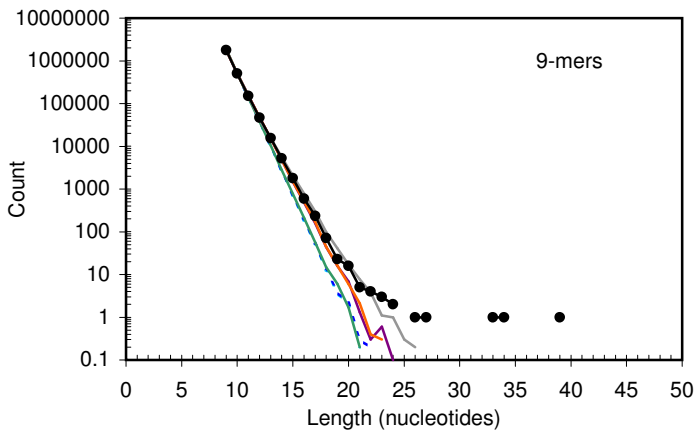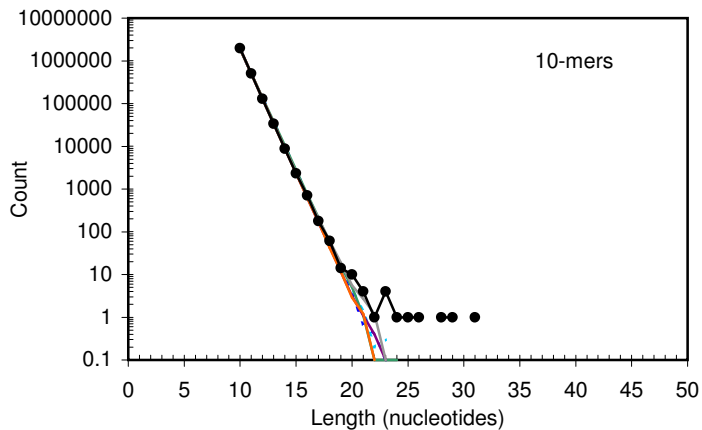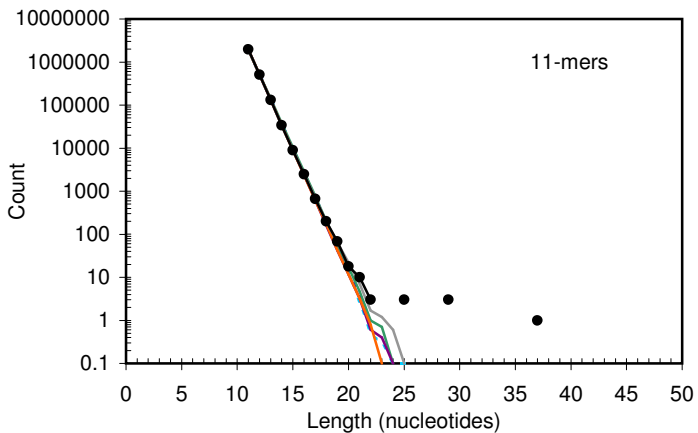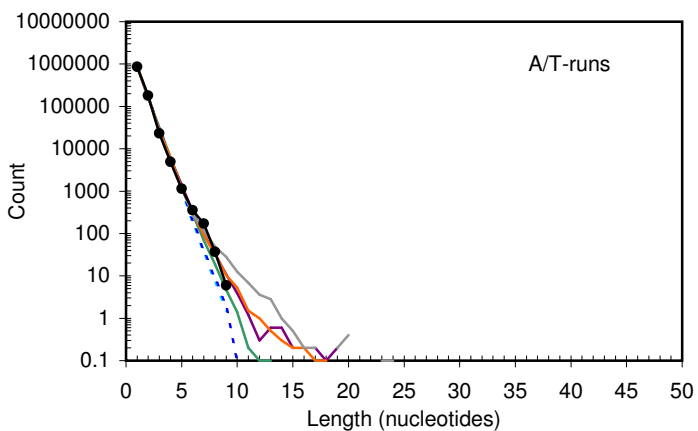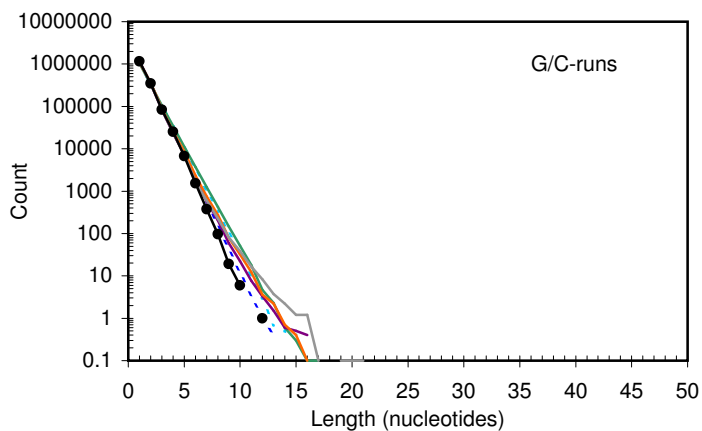

# *Escherichia coli* K12

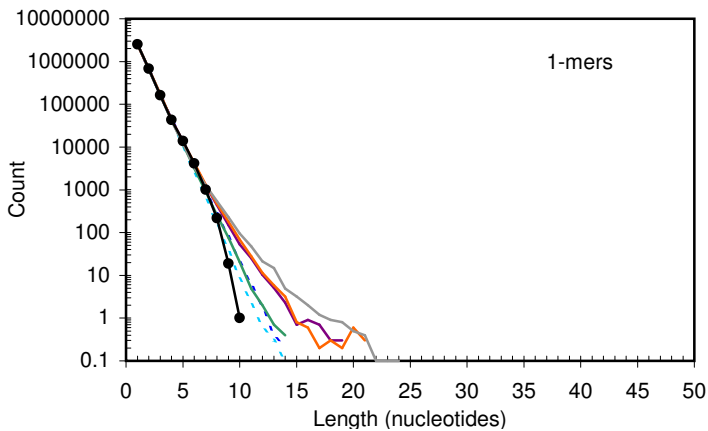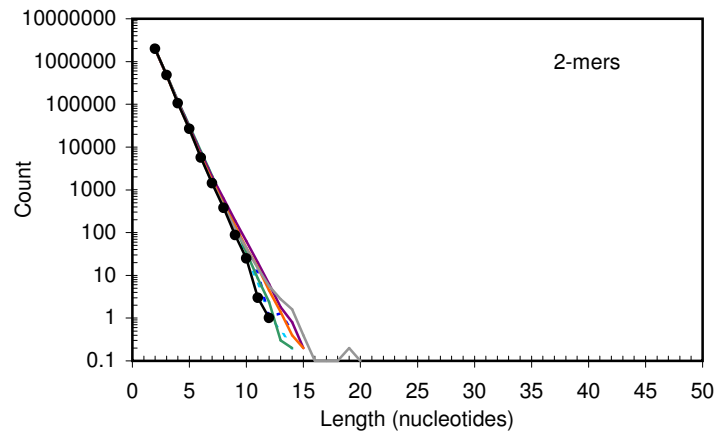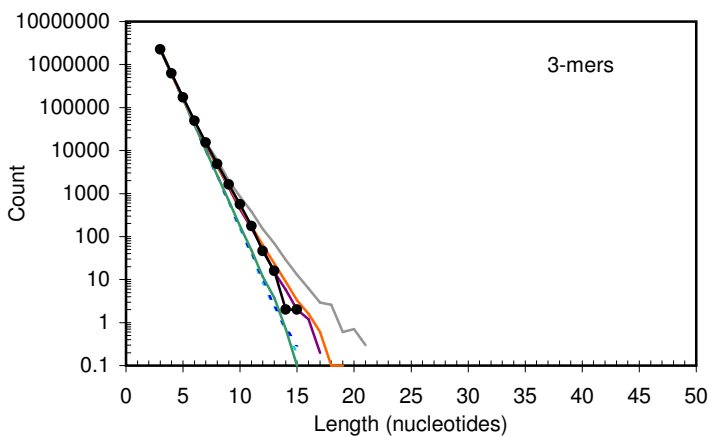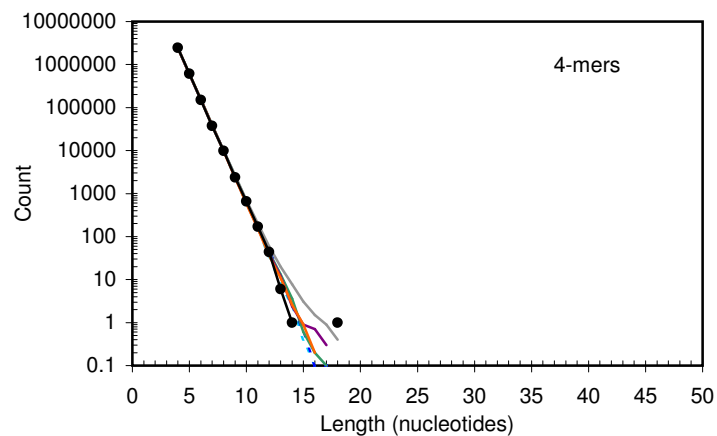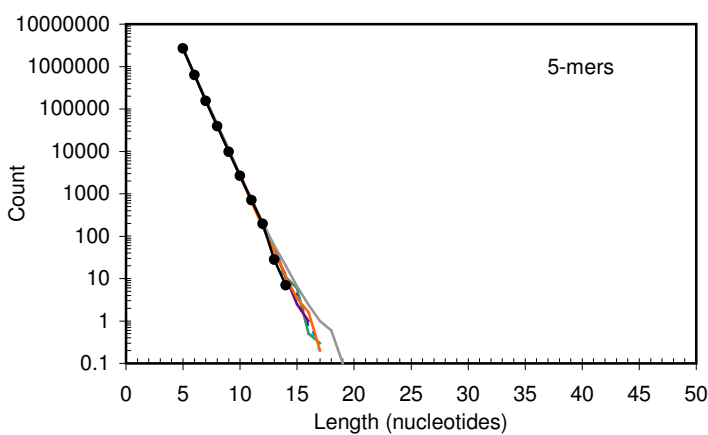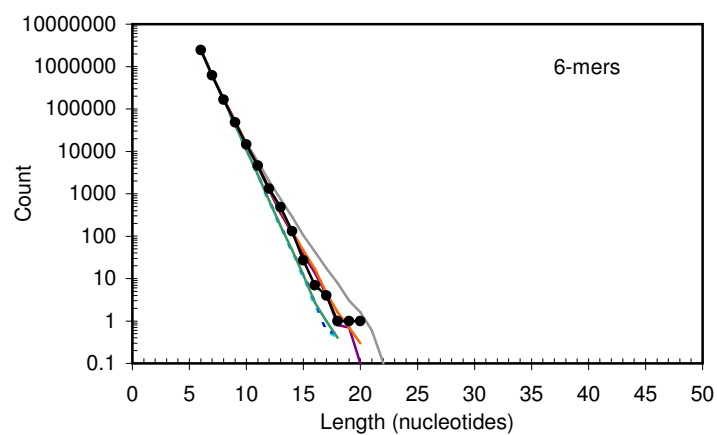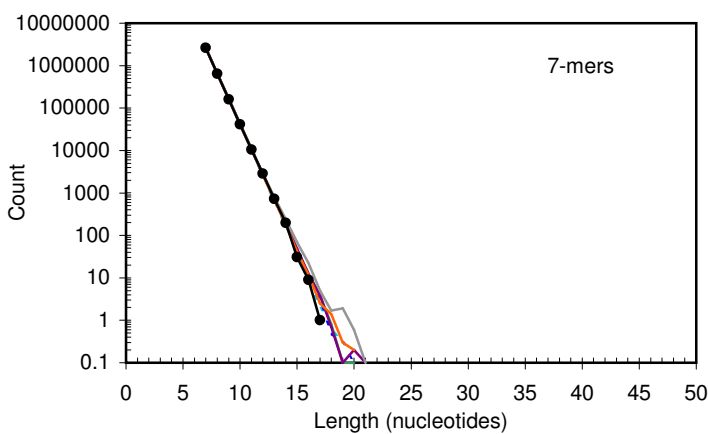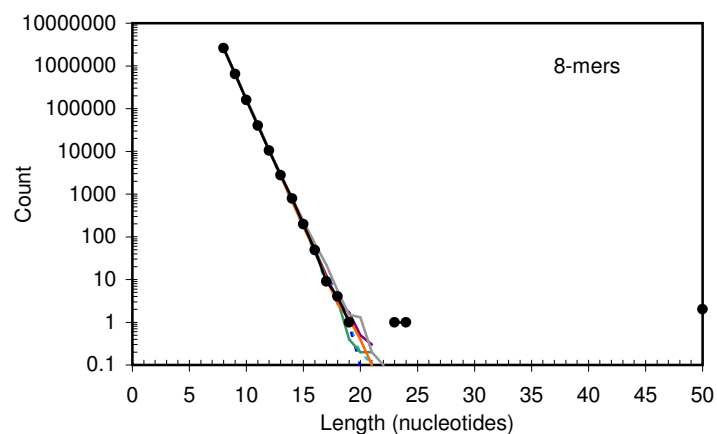

# *Escherichia coli* K12

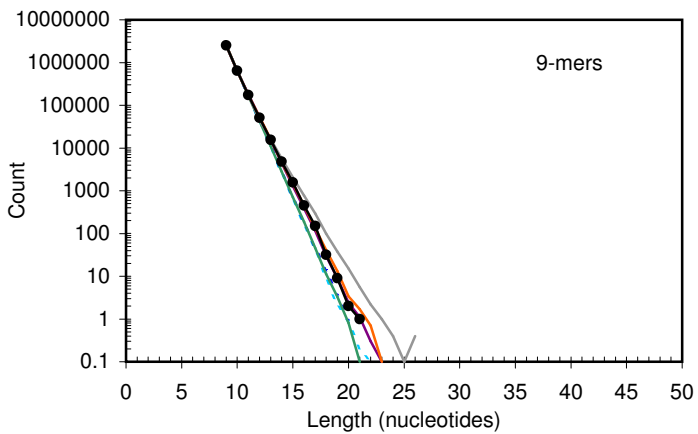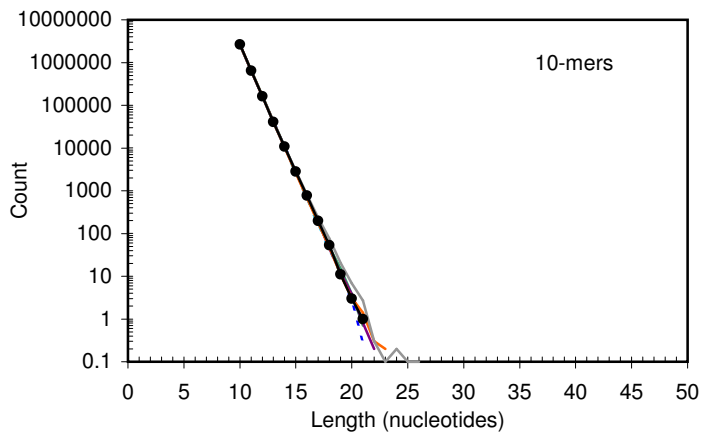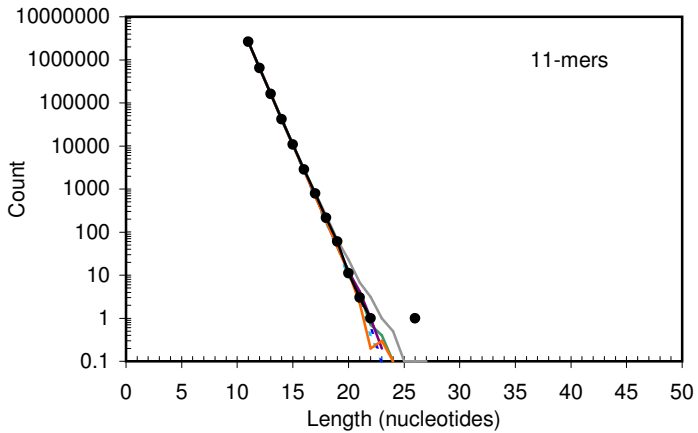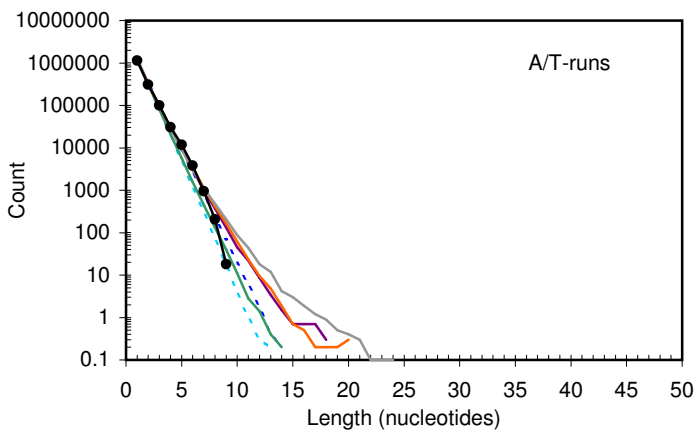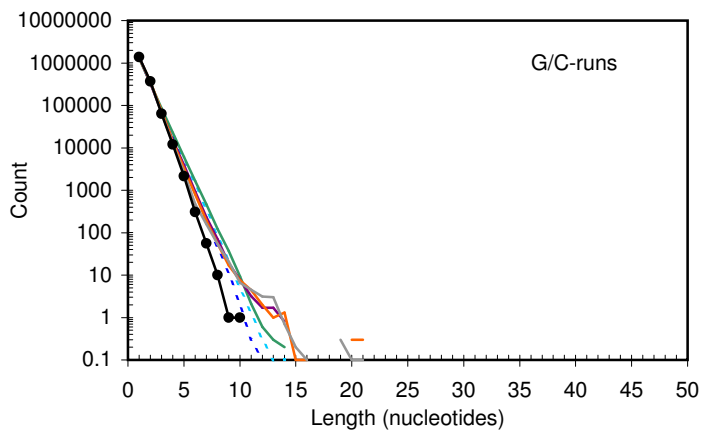

# *Escherichia coli* O157:H7 EDL933

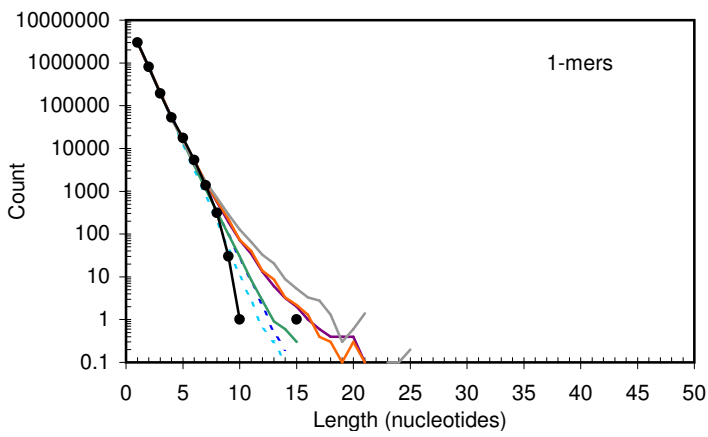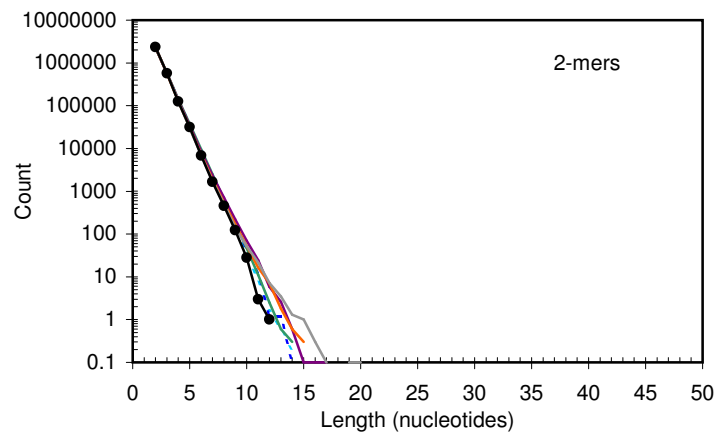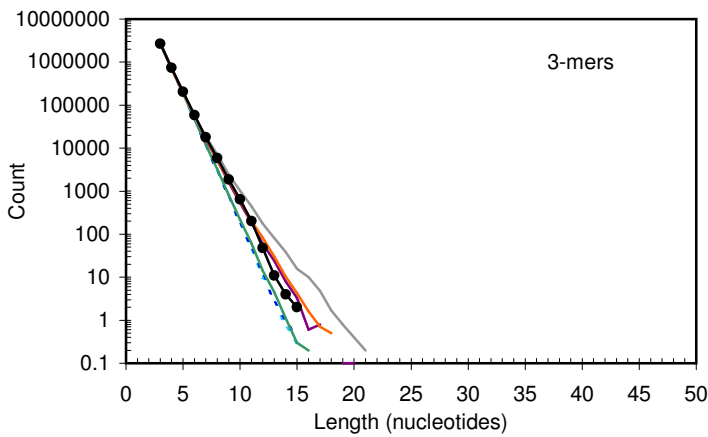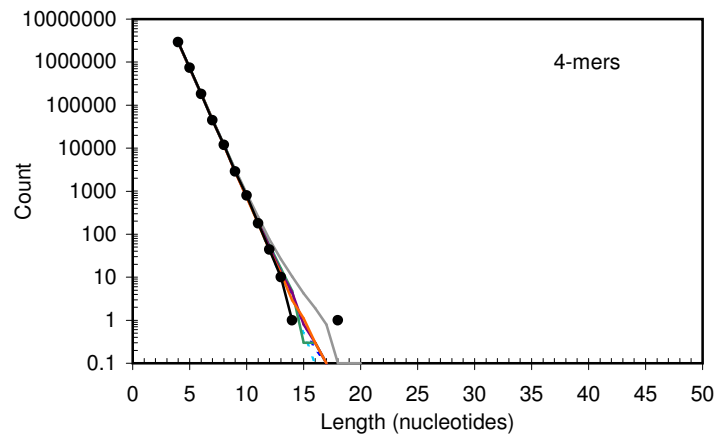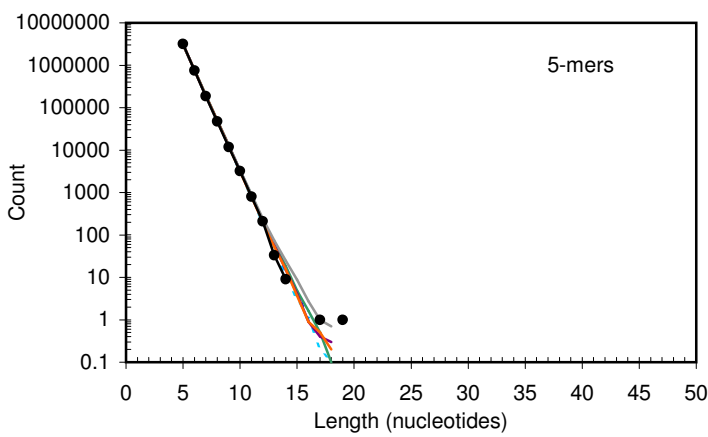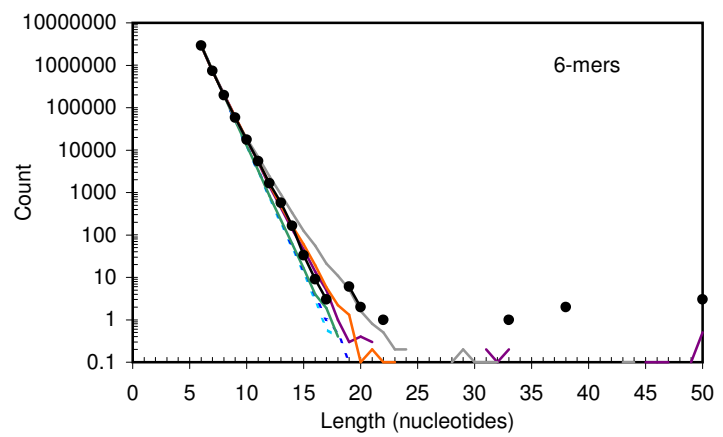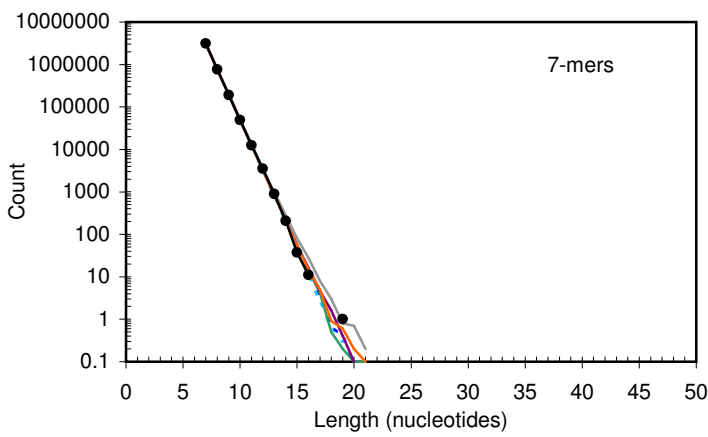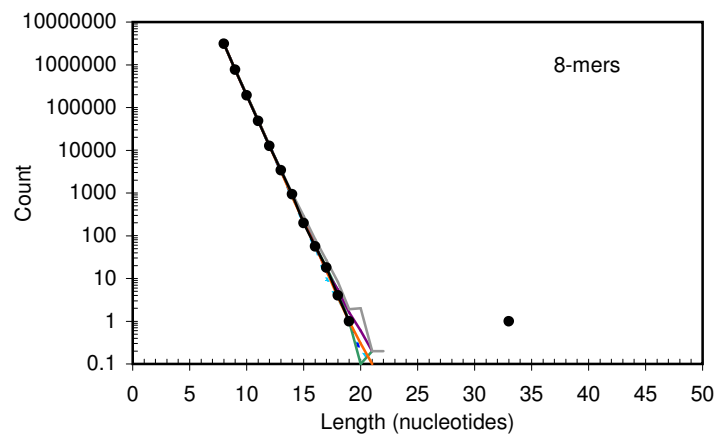

# *Escherichia coli* O157:H7 EDL933

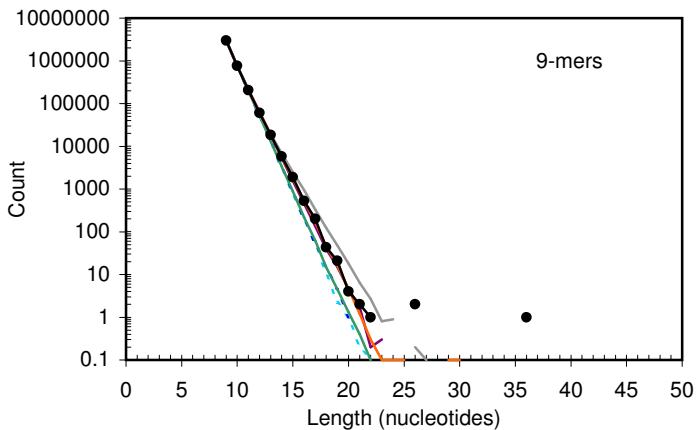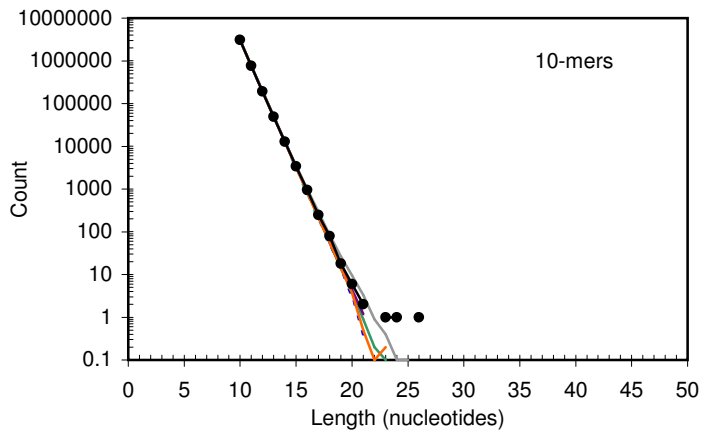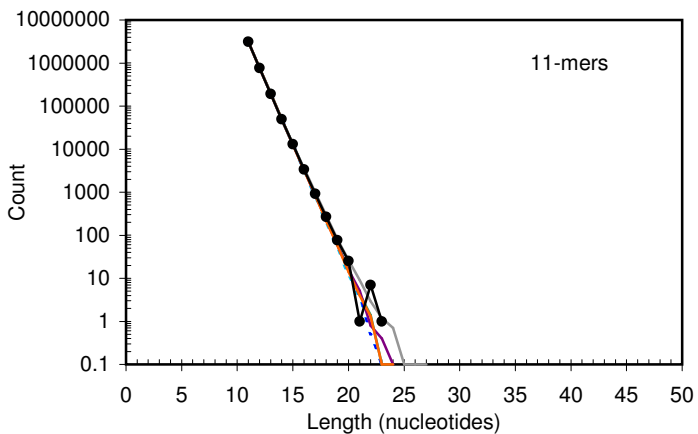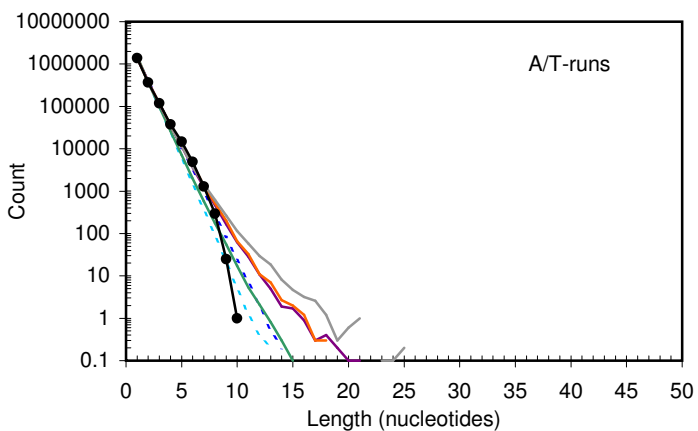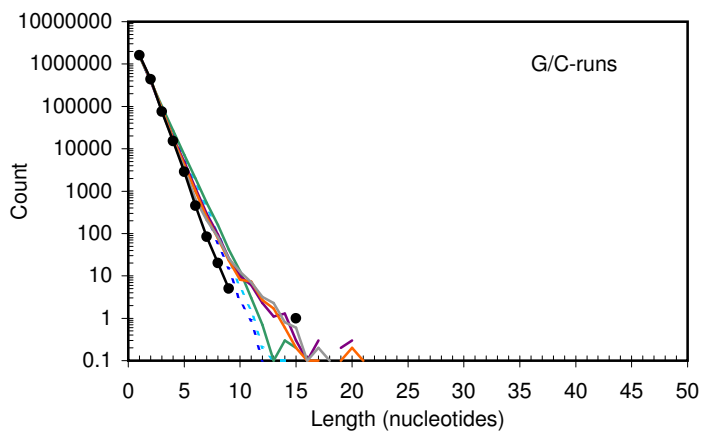



# Frankia sp. Ccl3

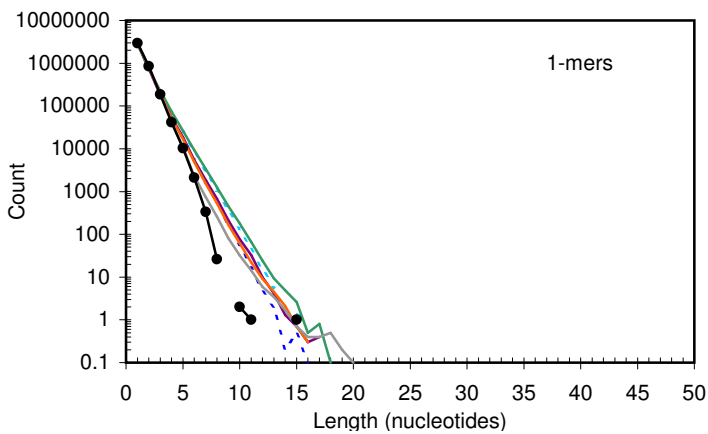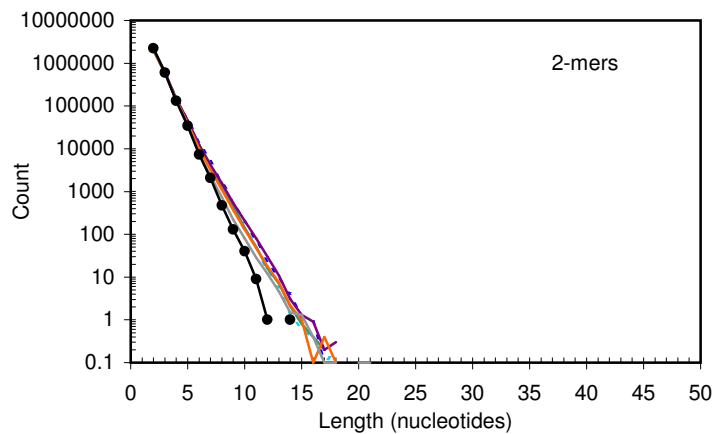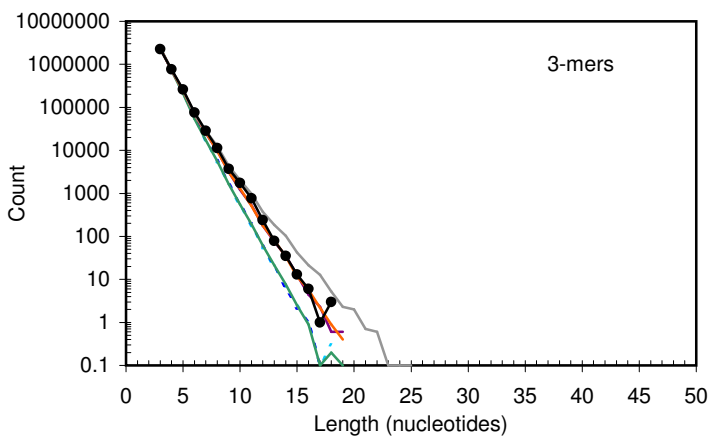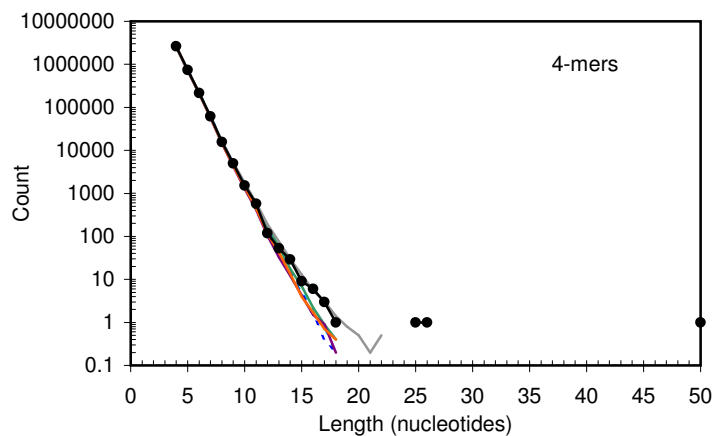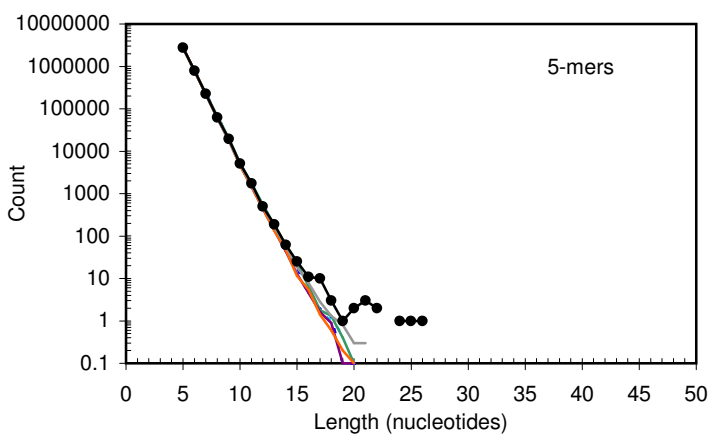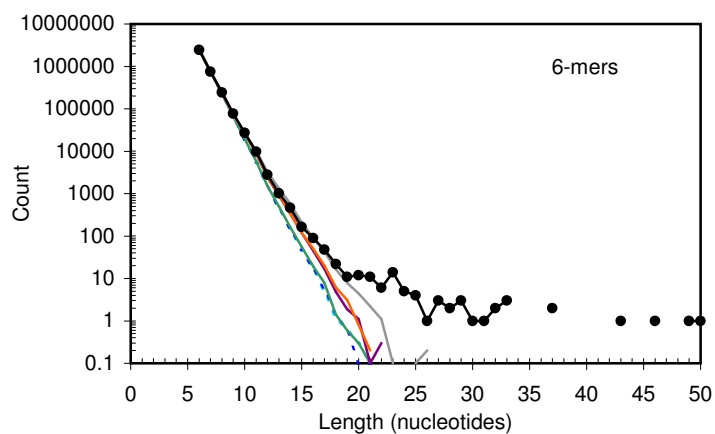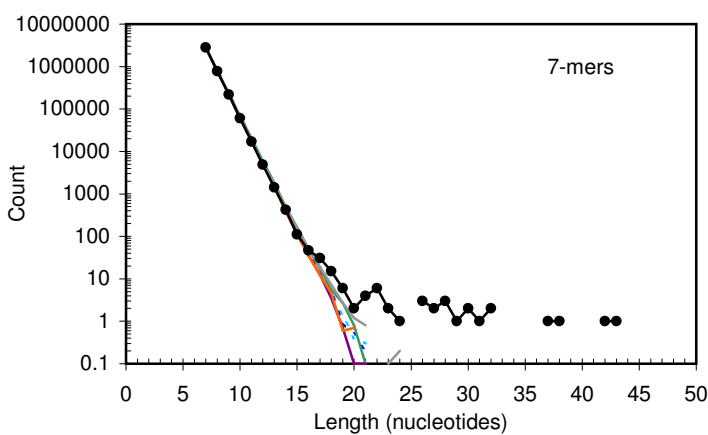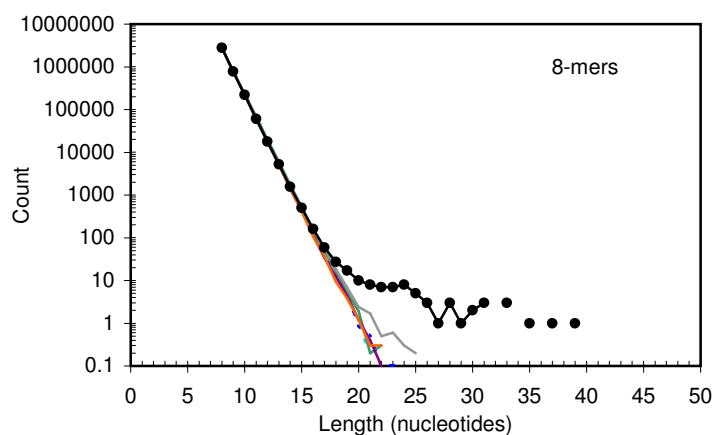

# Frankia sp. CcI3

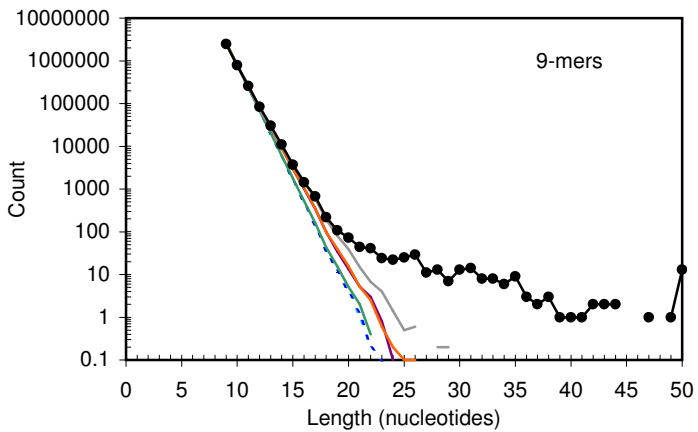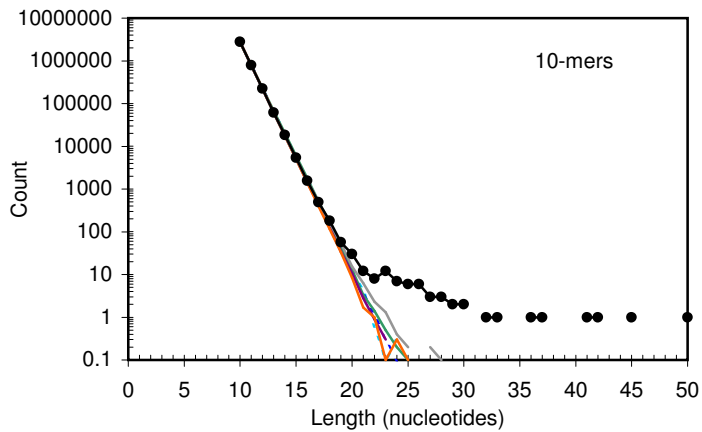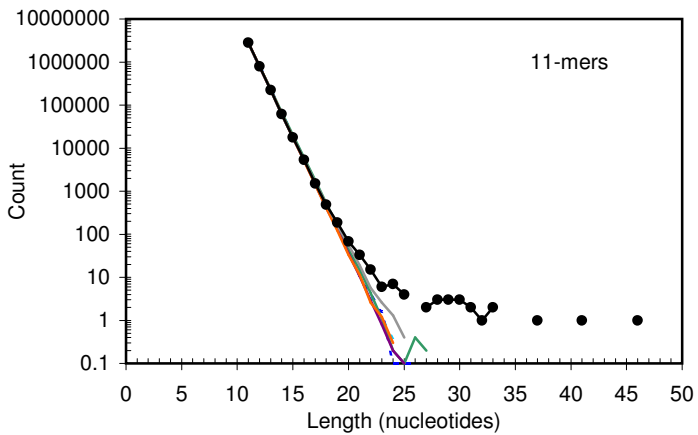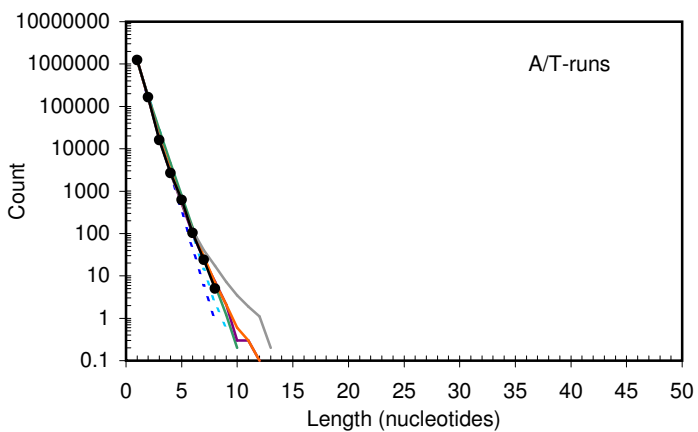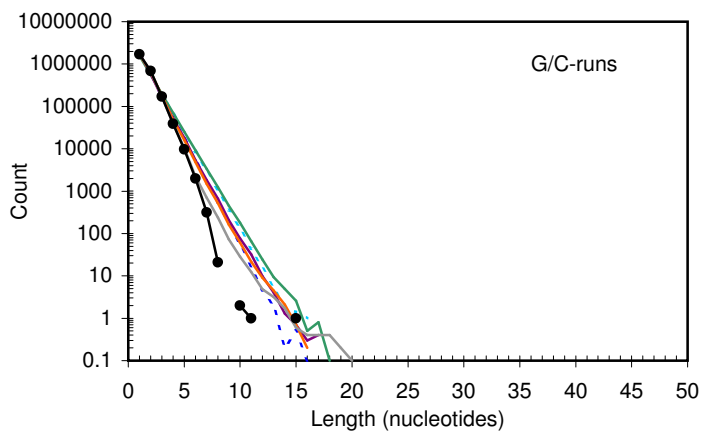

# *Lawsonia intracellularis*

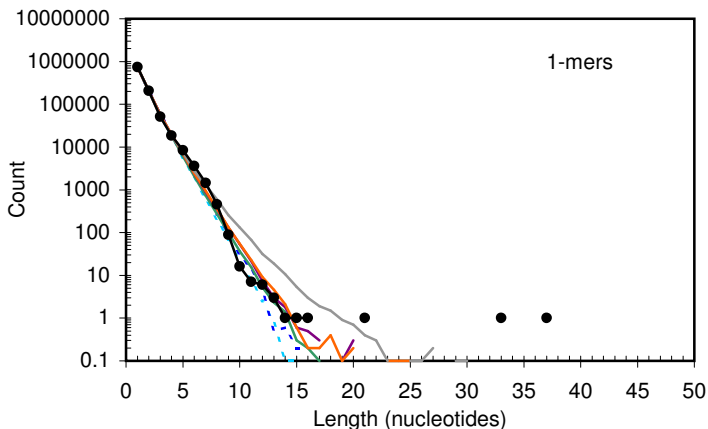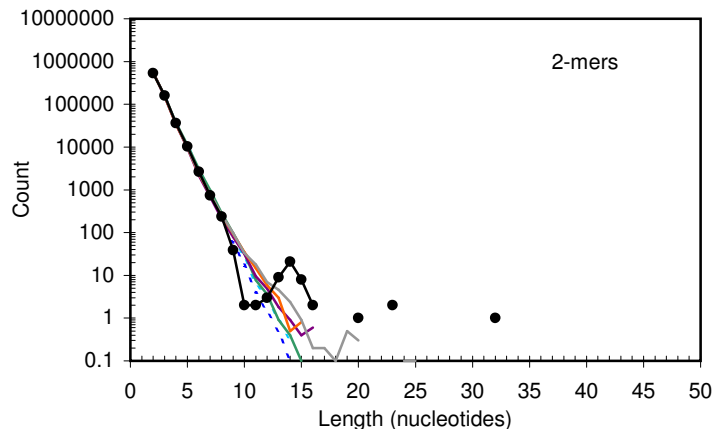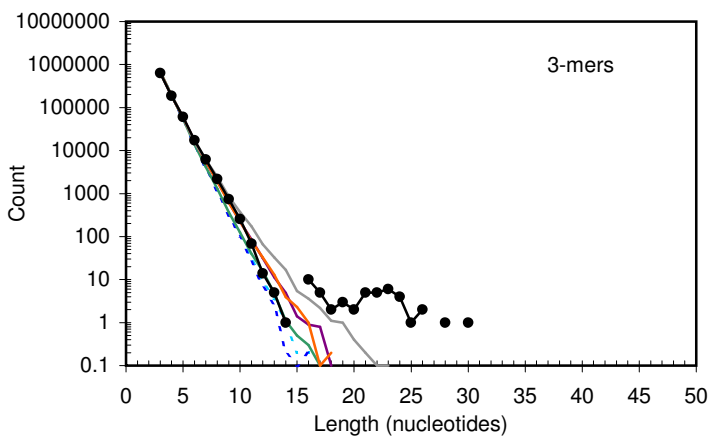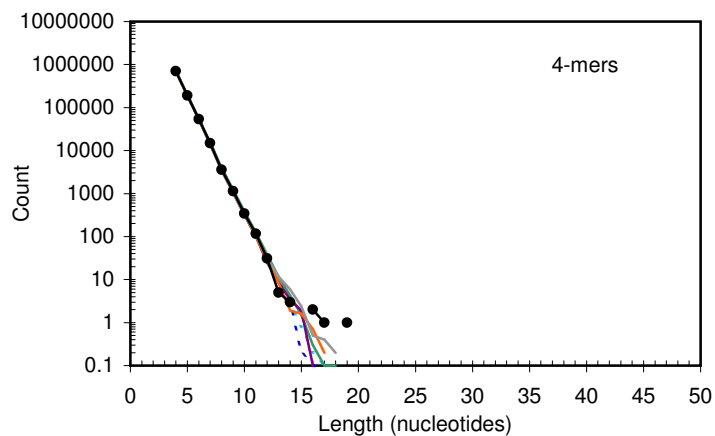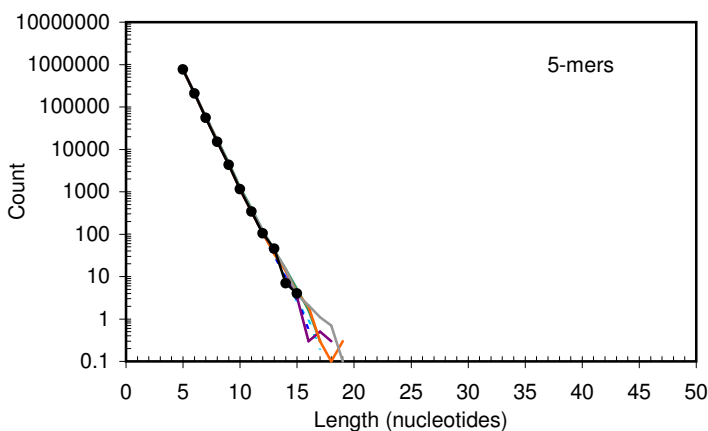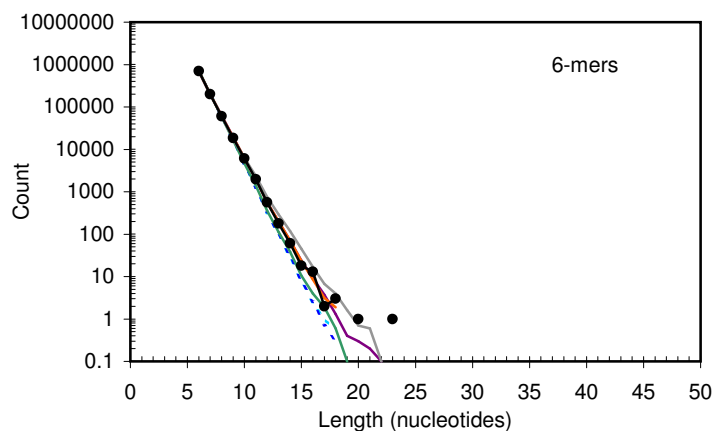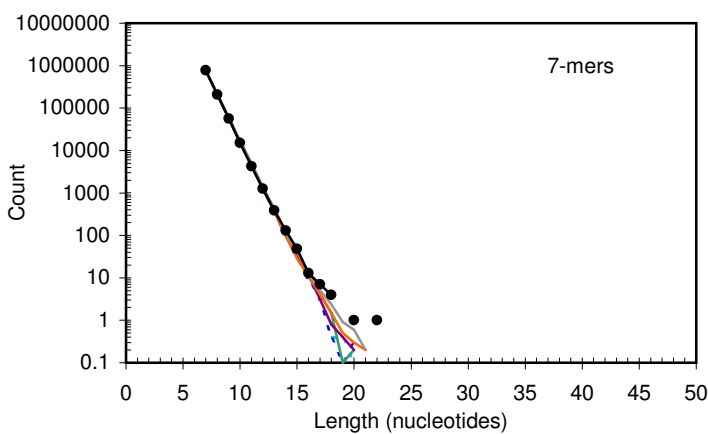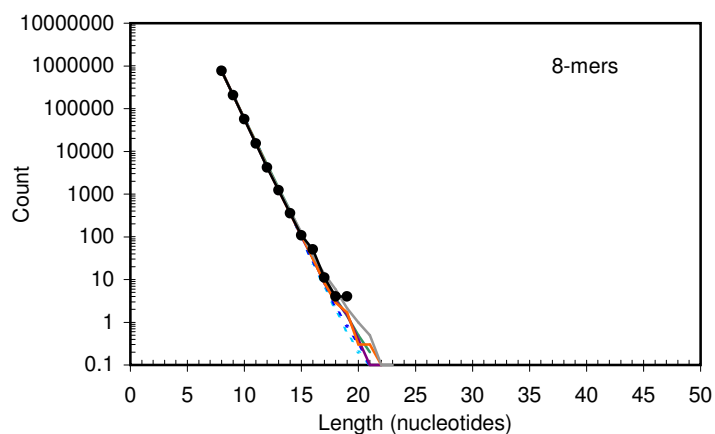

# *Lawsonia intracellularis*

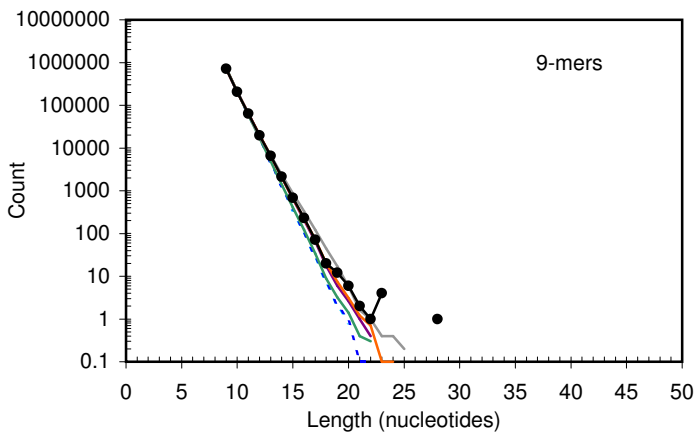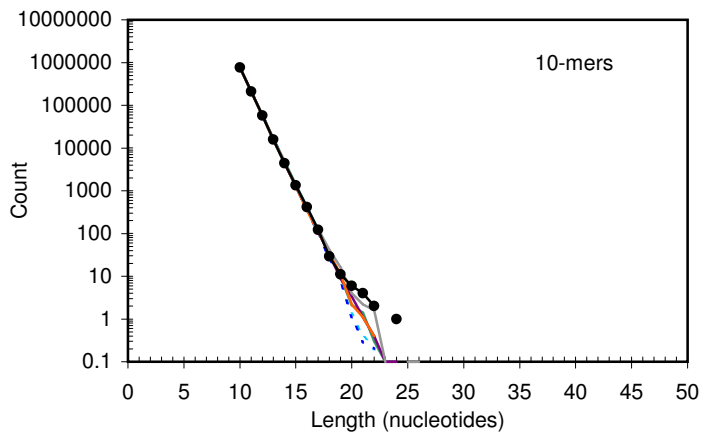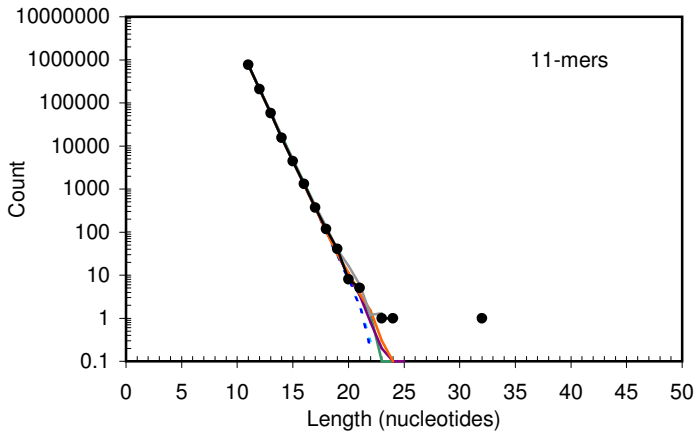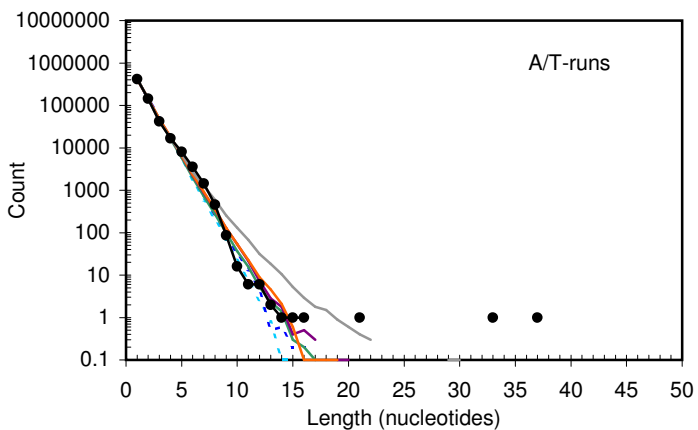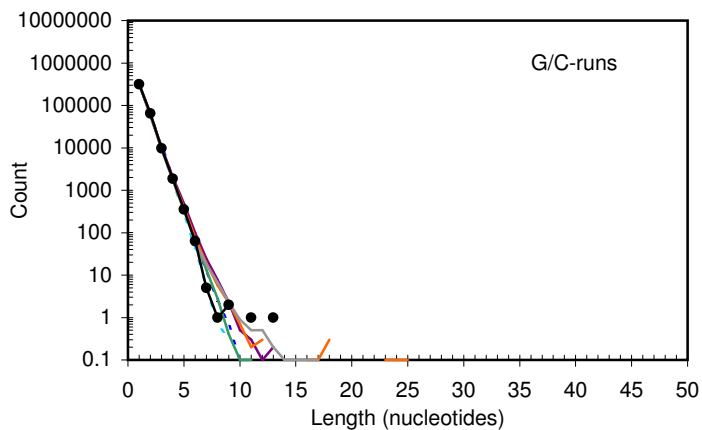

*Methanosarcina barkeri* str. Fusaro  
chromosome 1

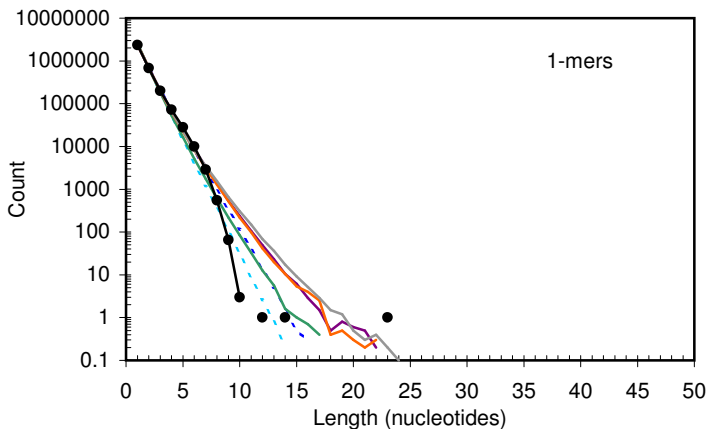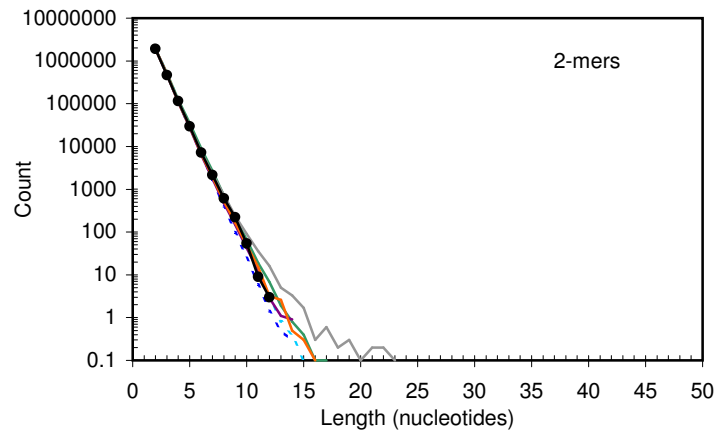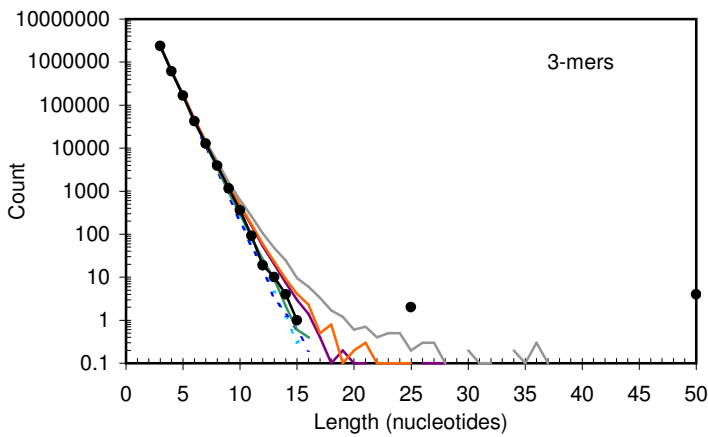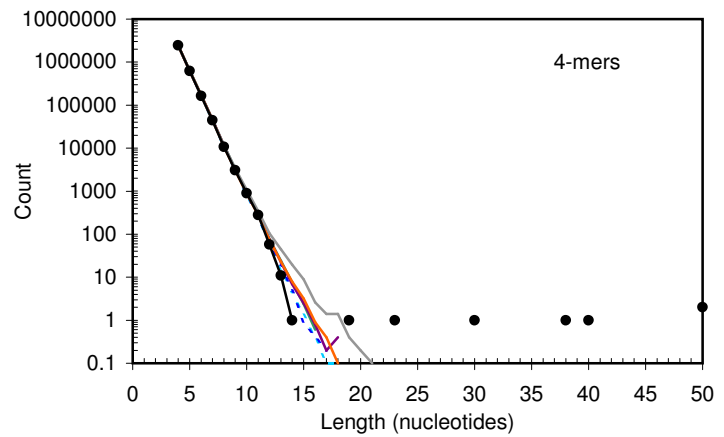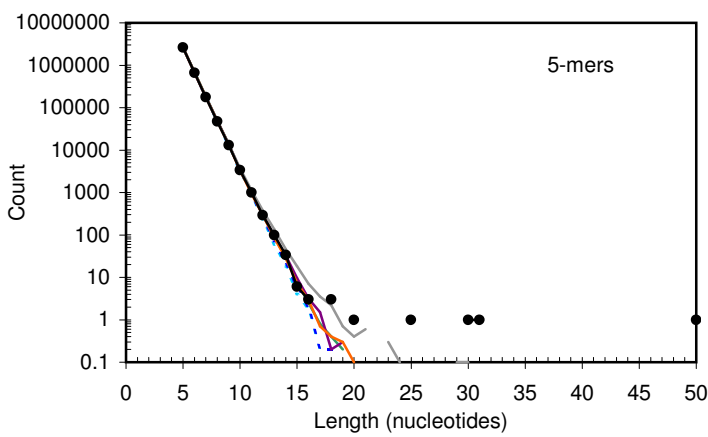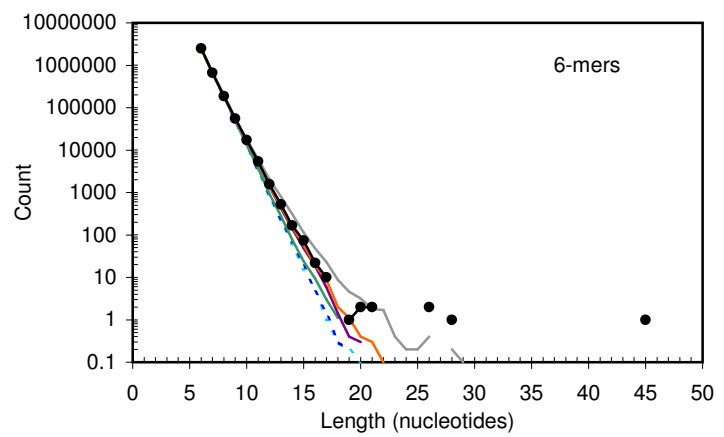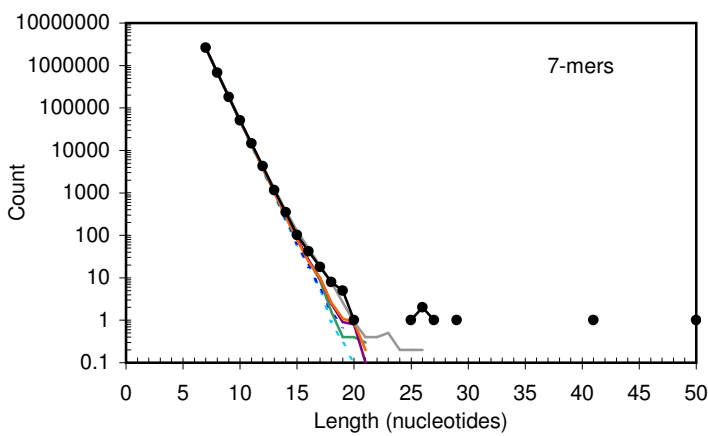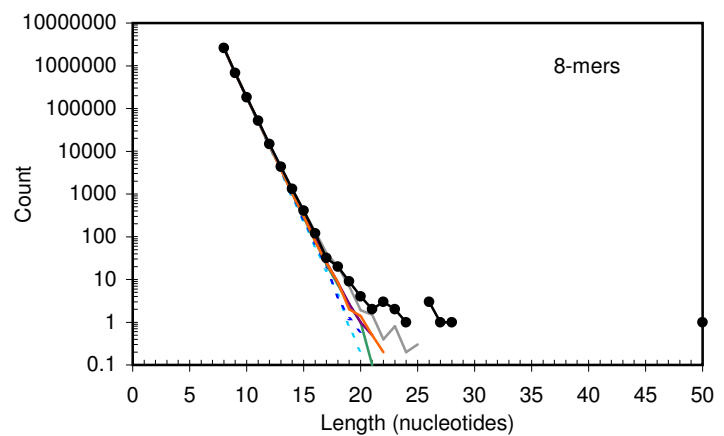

# *Methanosarcina barkeri* str. Fusaro chromosome 1

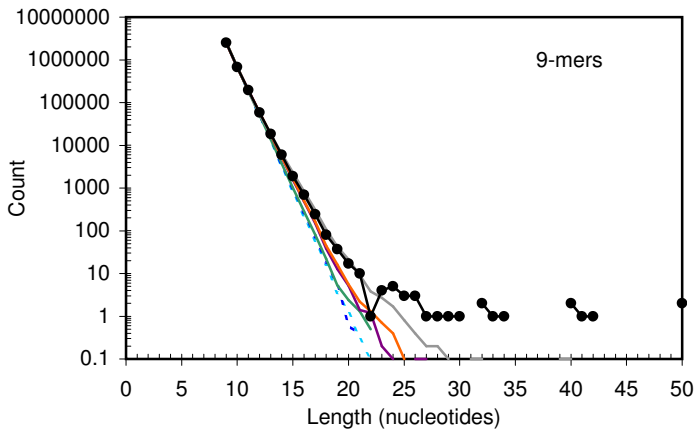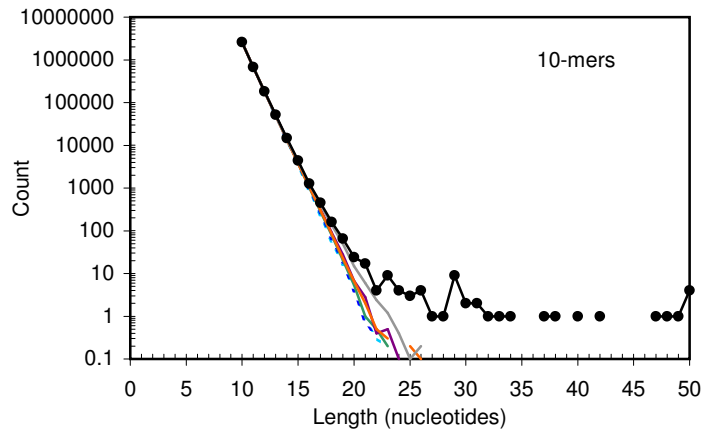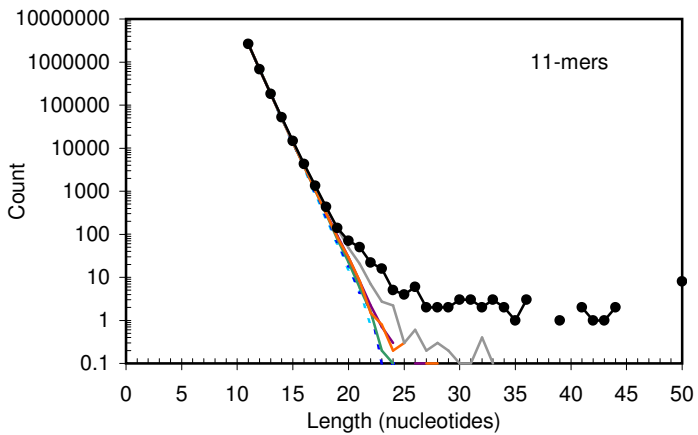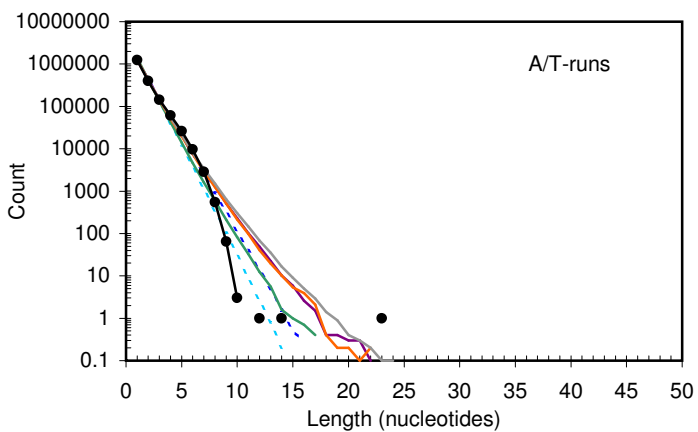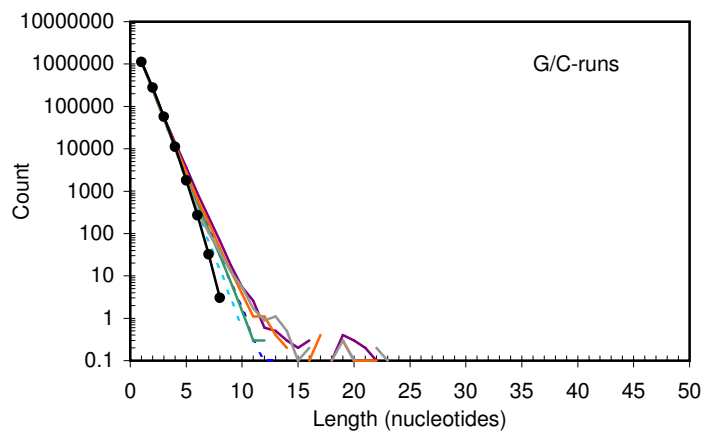

# *Methanosarcina mazei* Go1

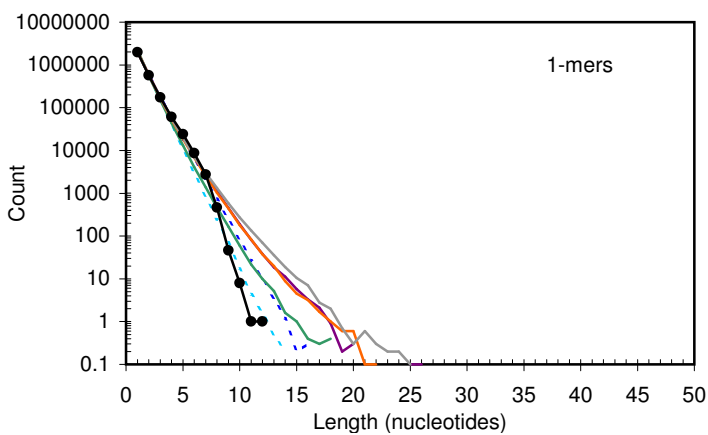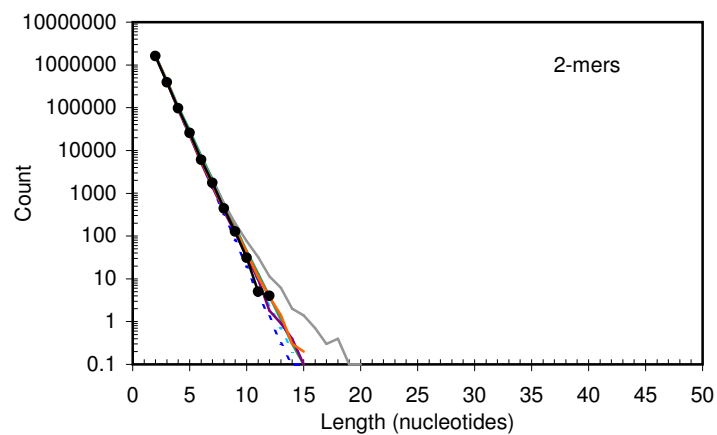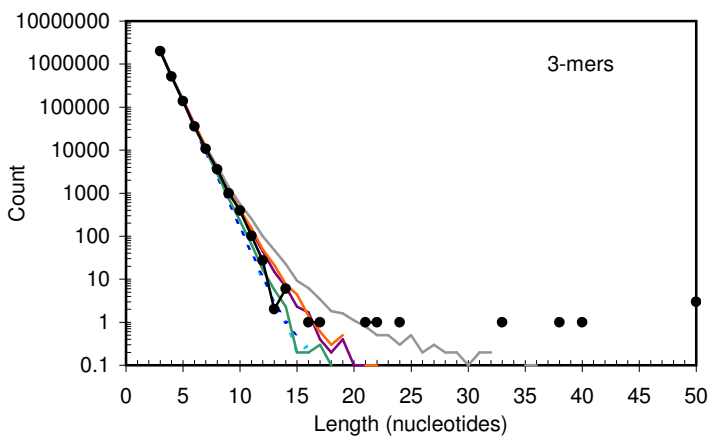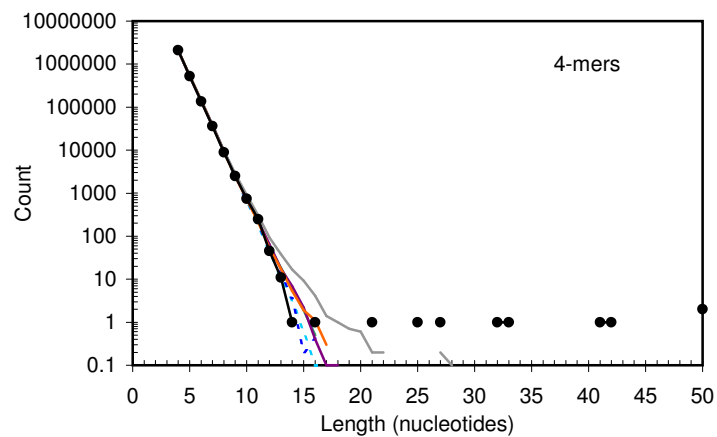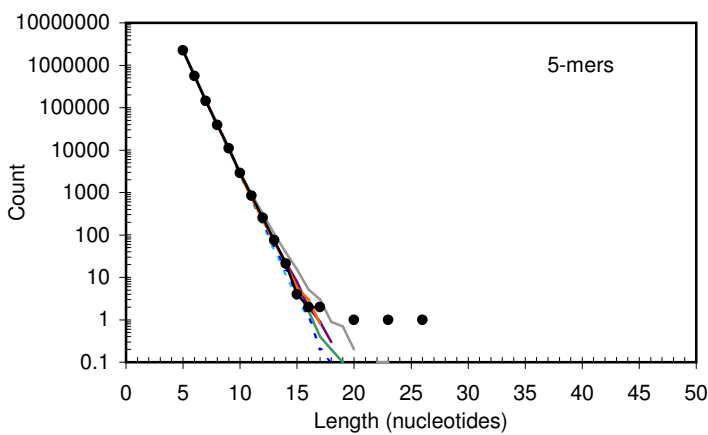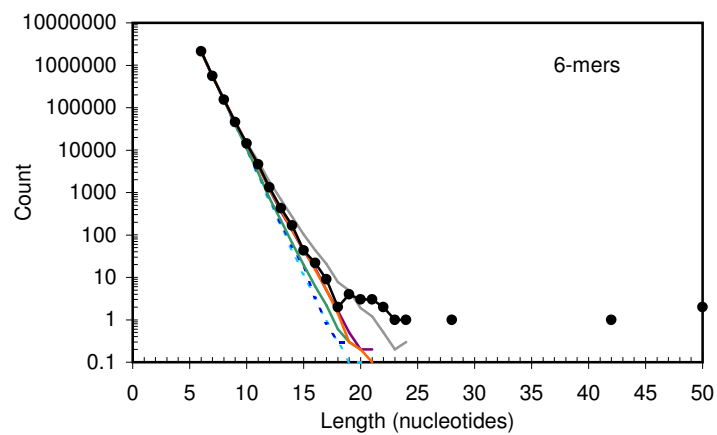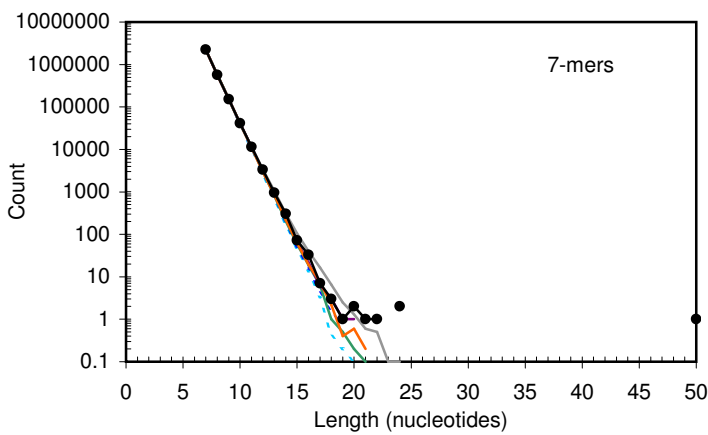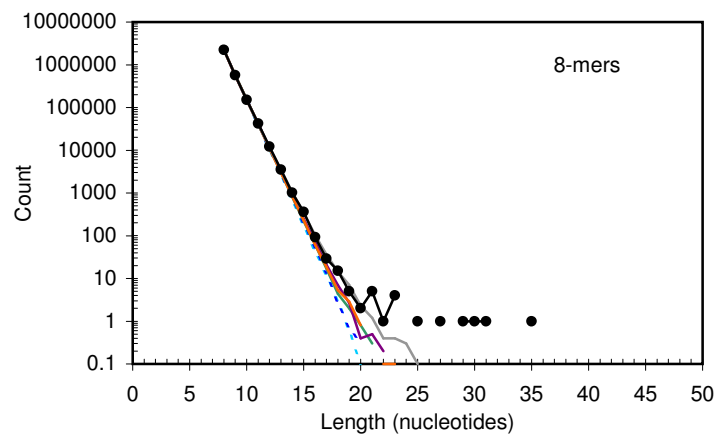

# *Methanosarcina mazei* Go1

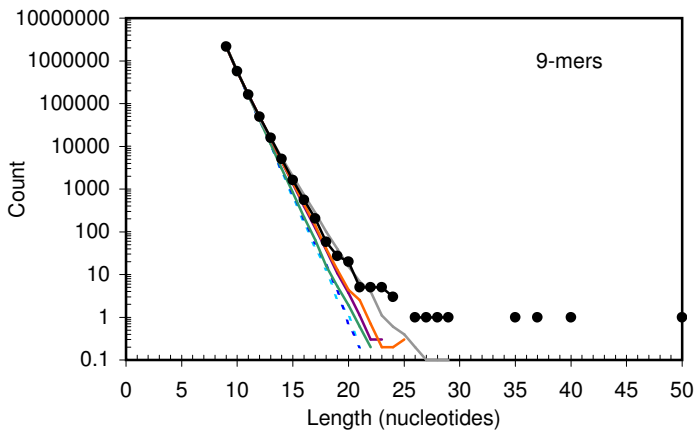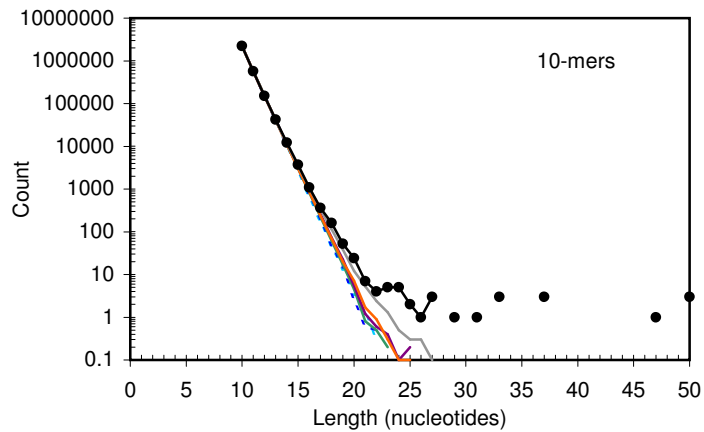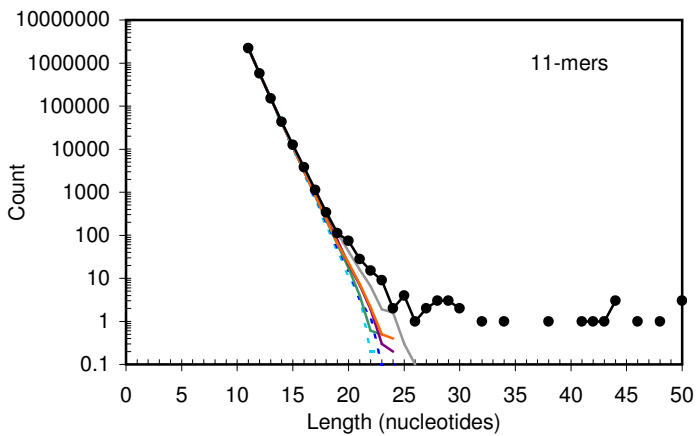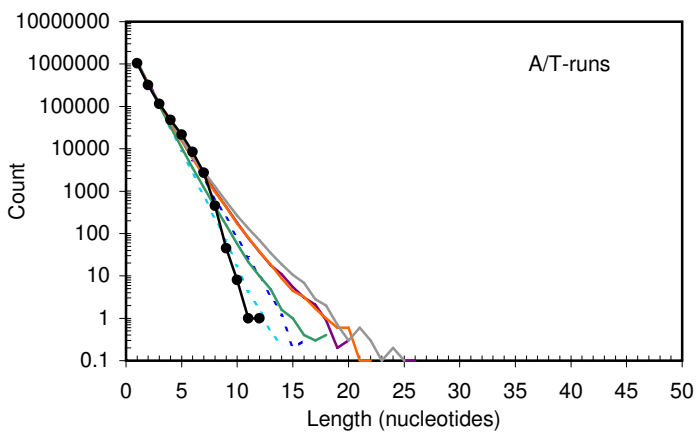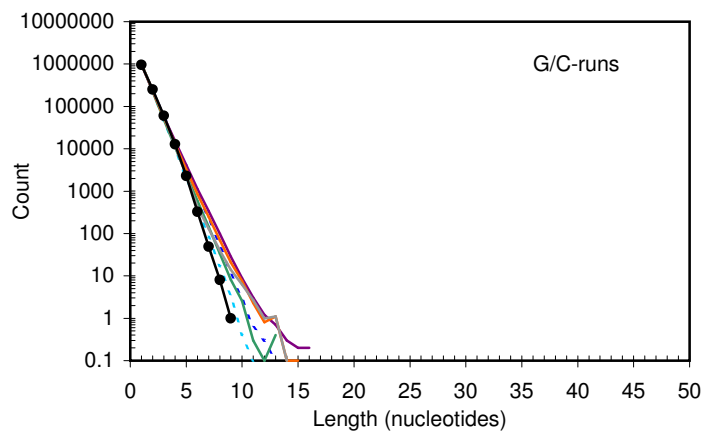



# *Mycobacterium bovis* AF2122-97

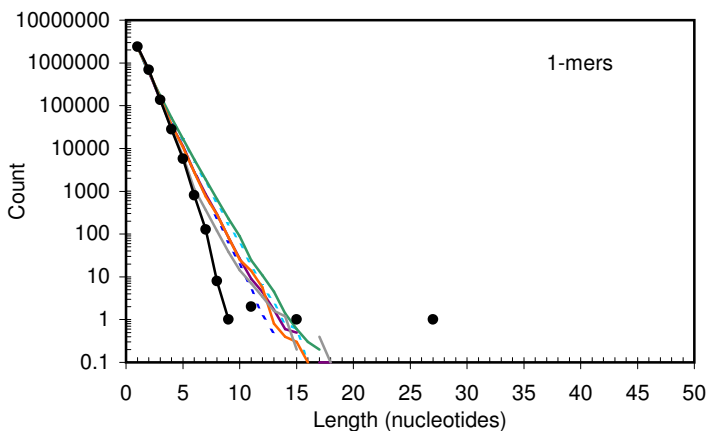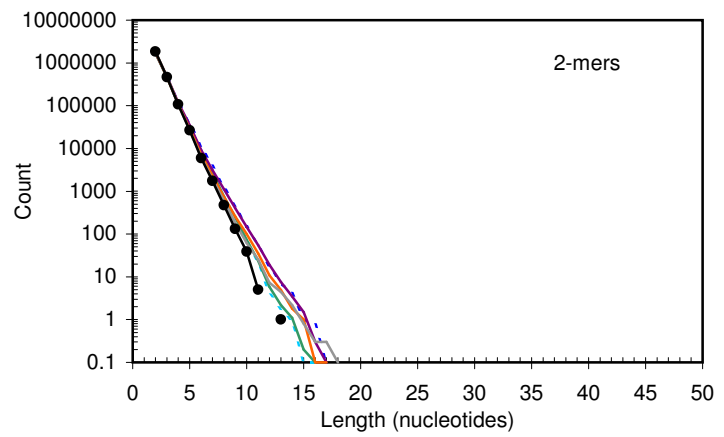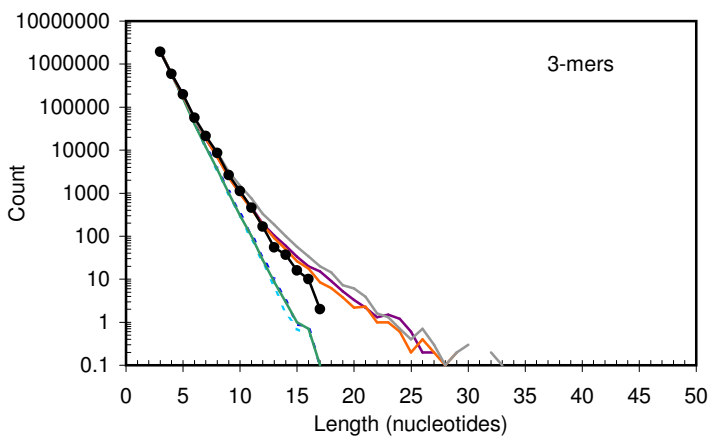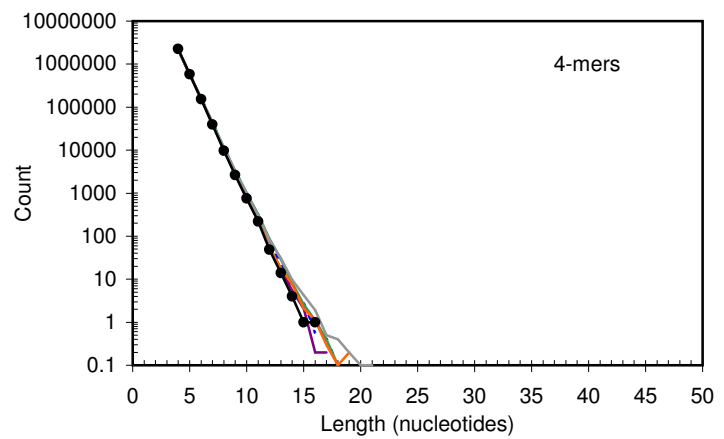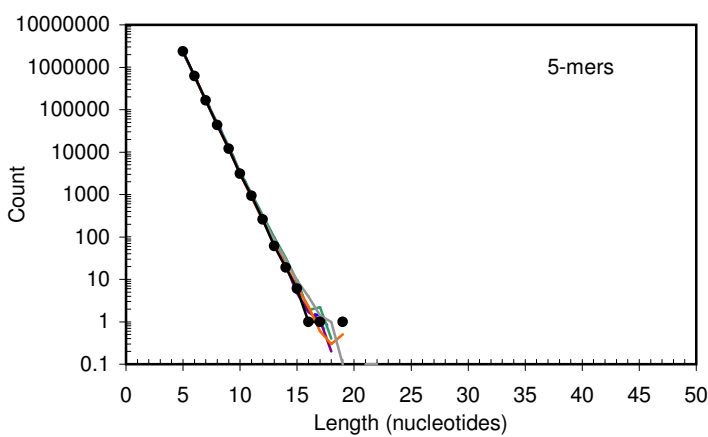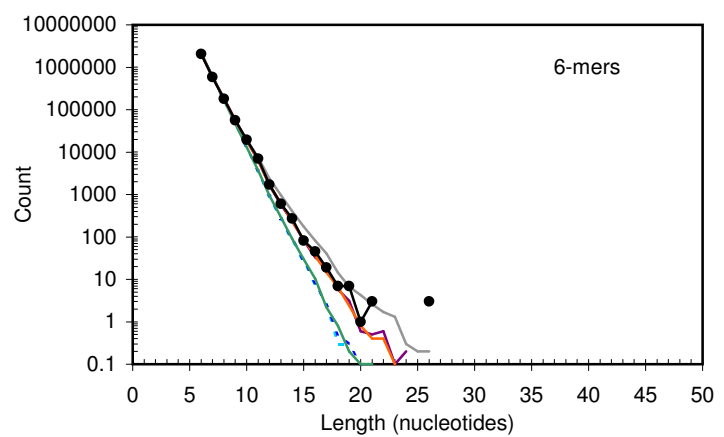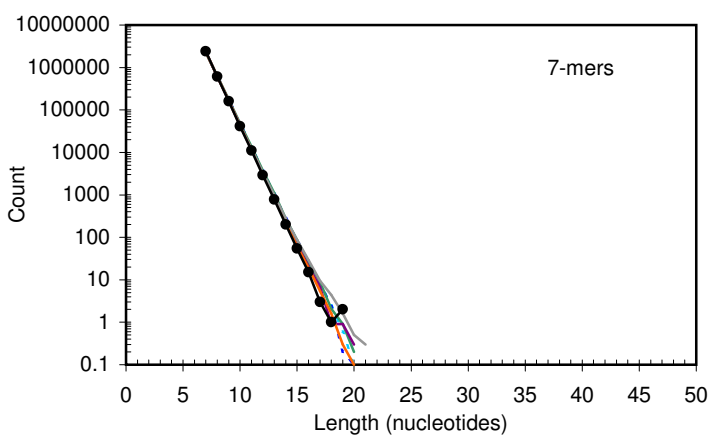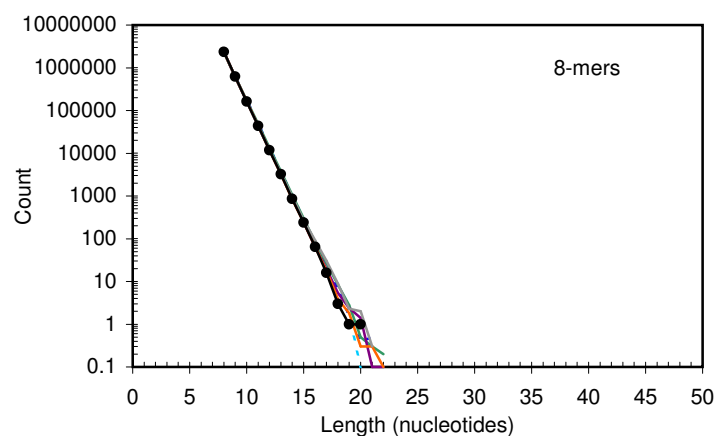

# *Mycobacterium bovis* AF2122-97

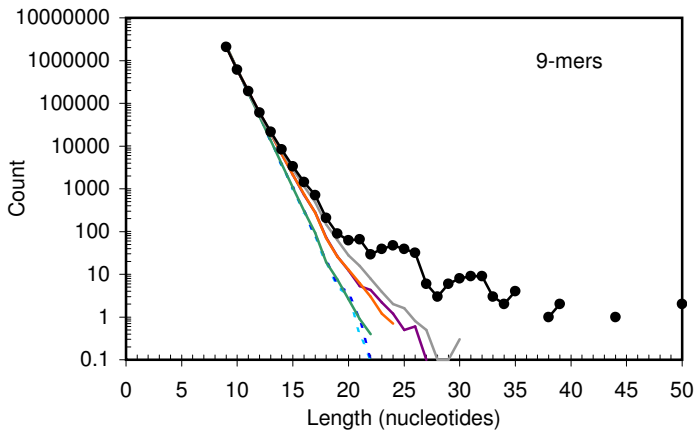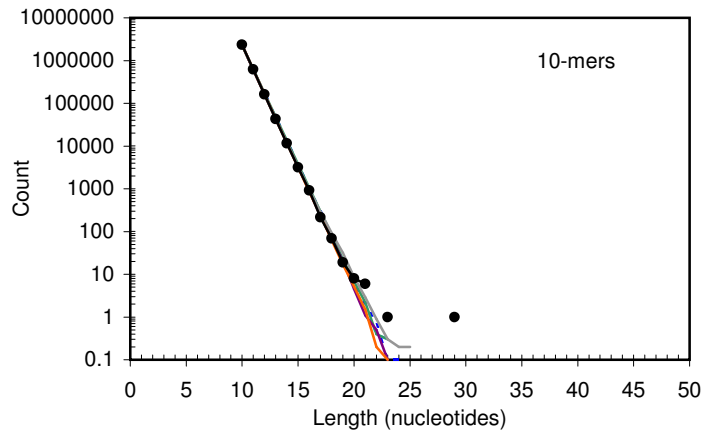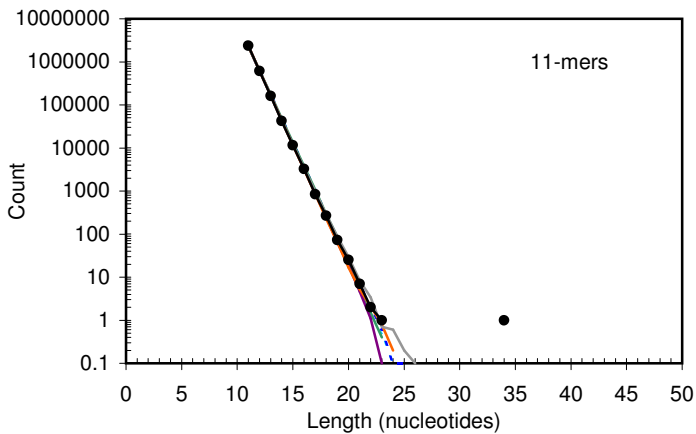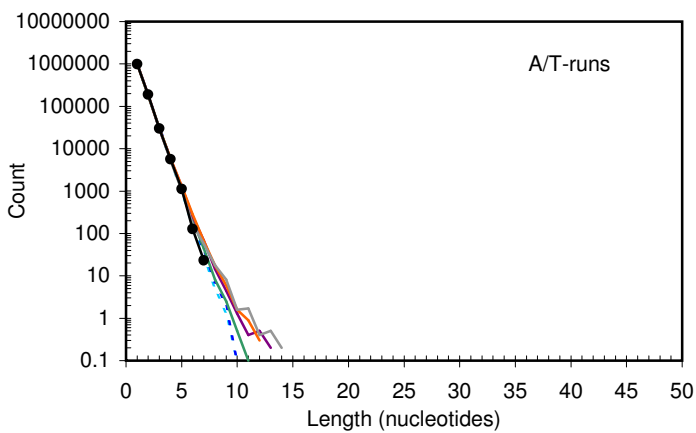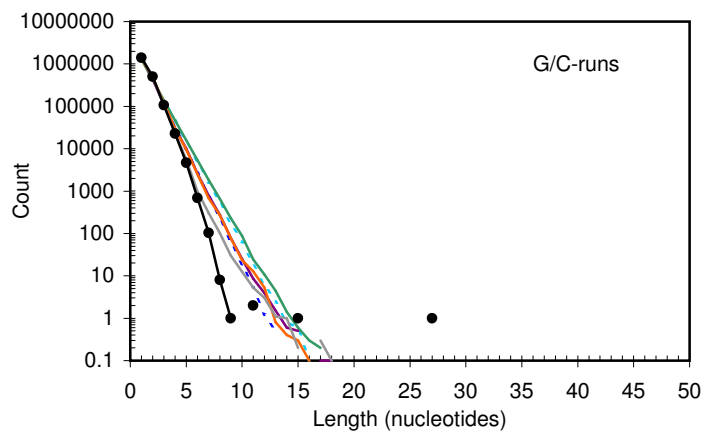

# *Mycobacterium leprae* TN

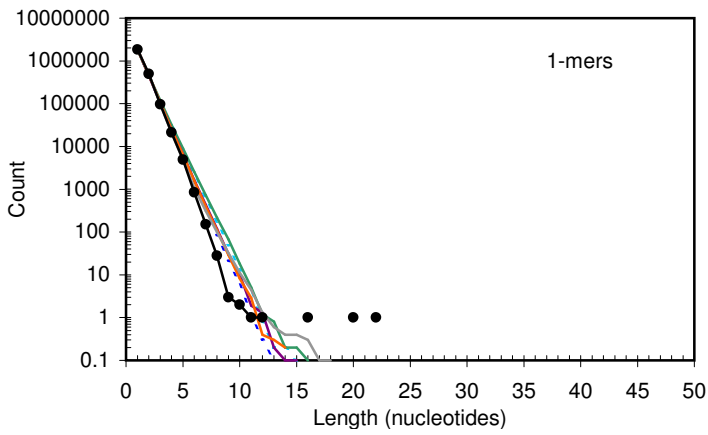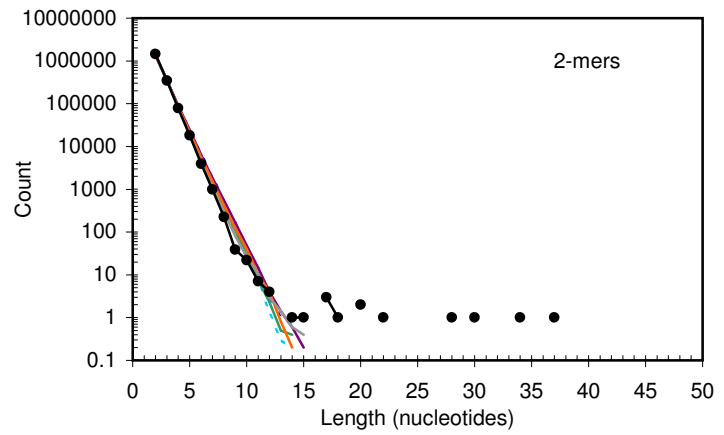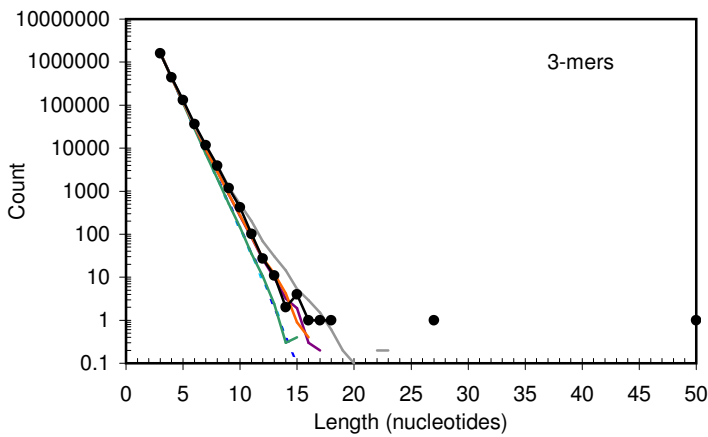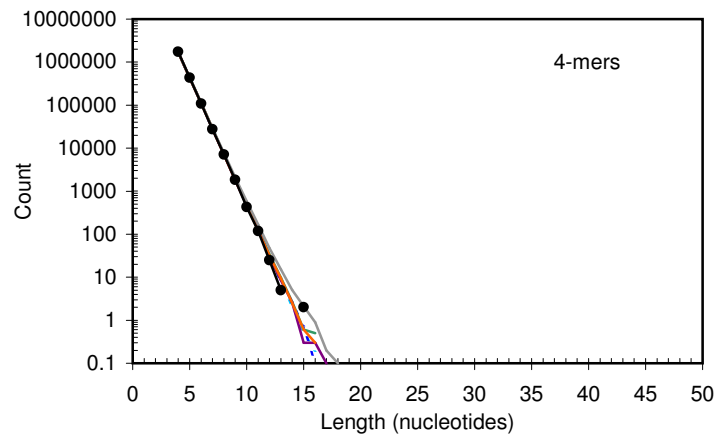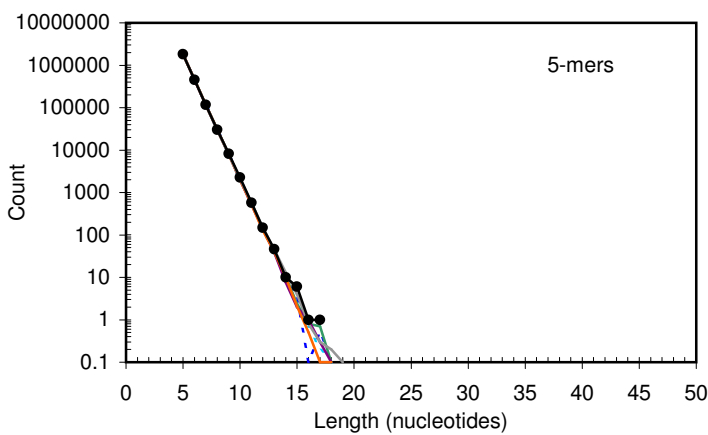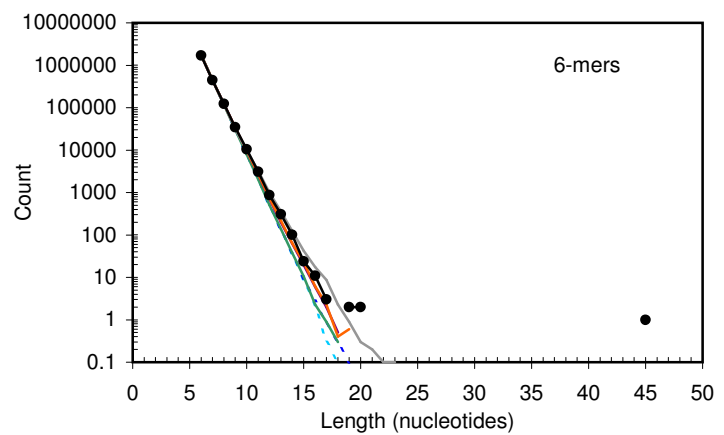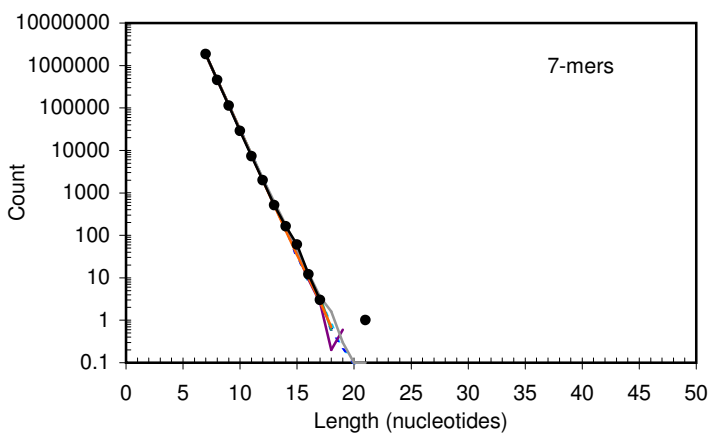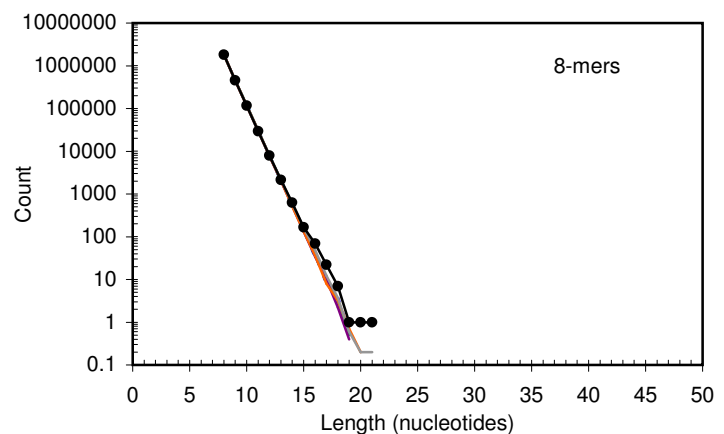

# *Mycobacterium leprae* TN

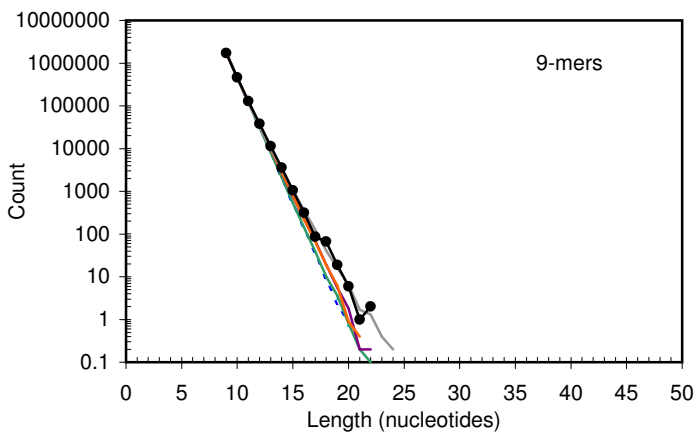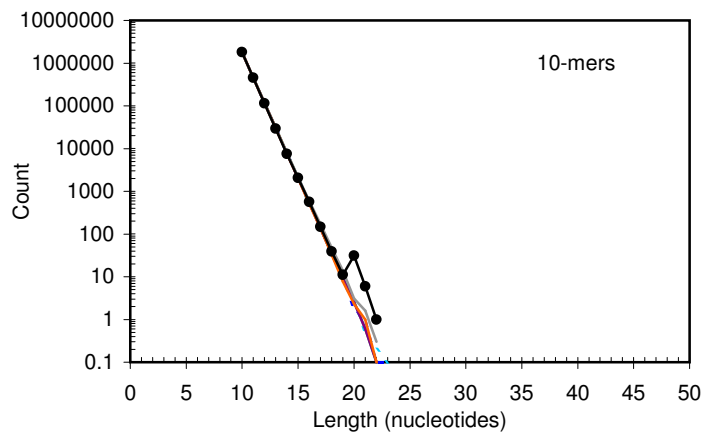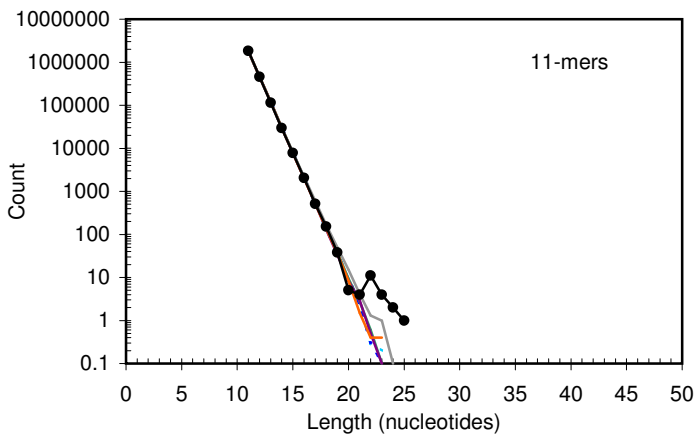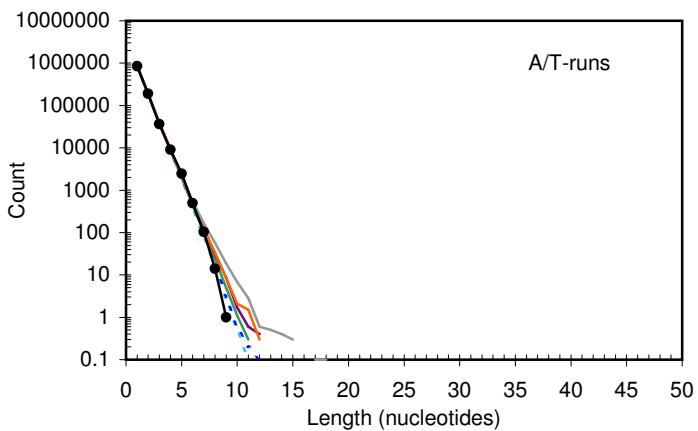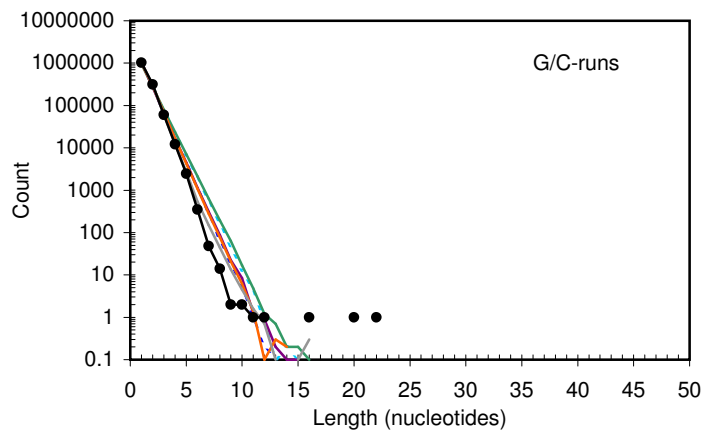

# *Mycoplasma gallisepticum* R

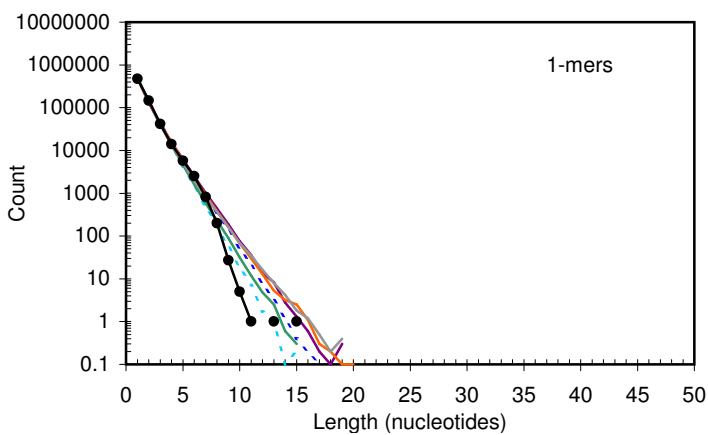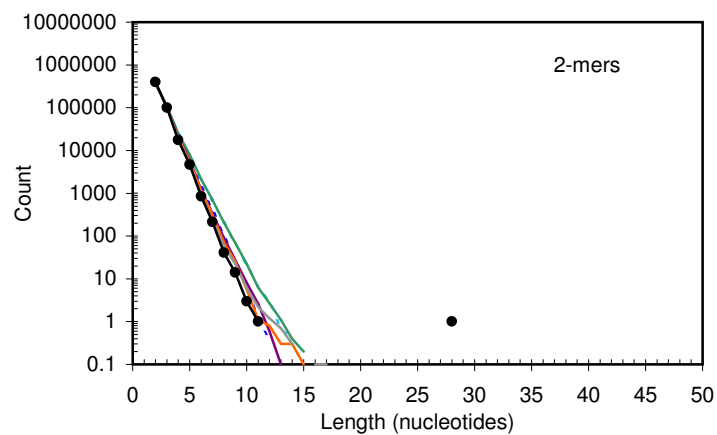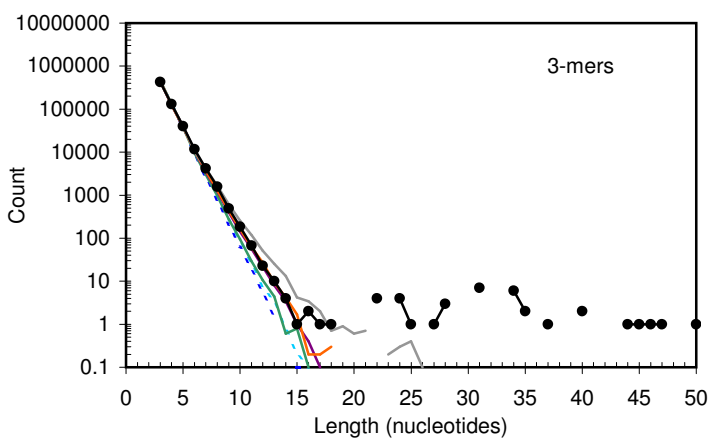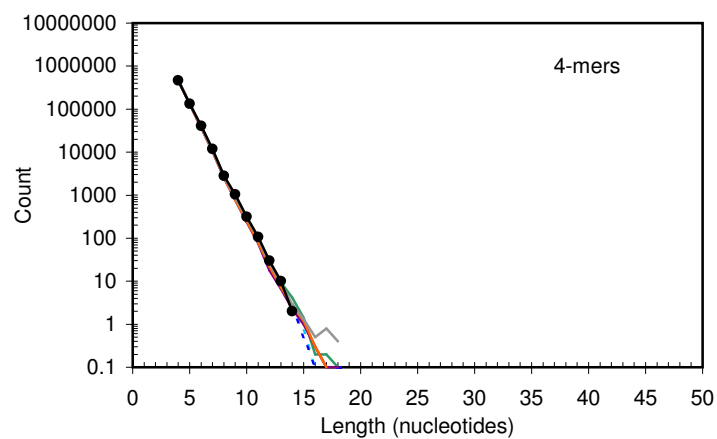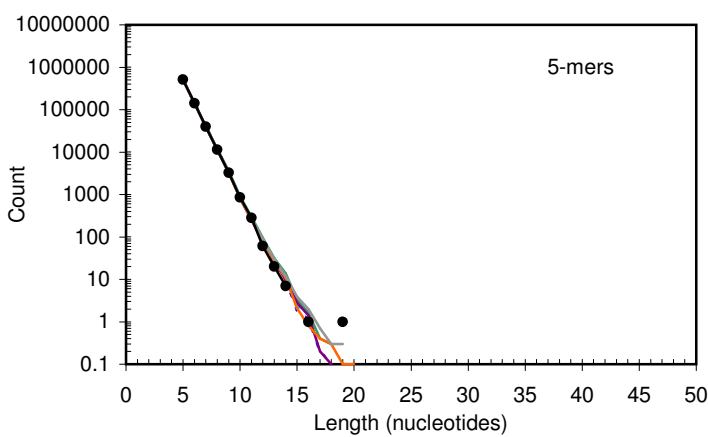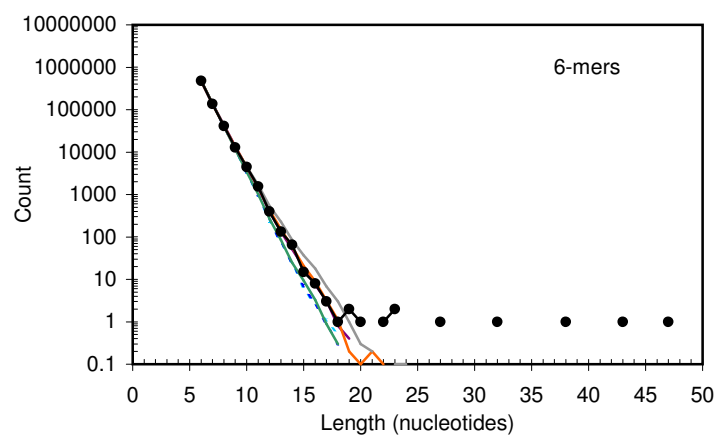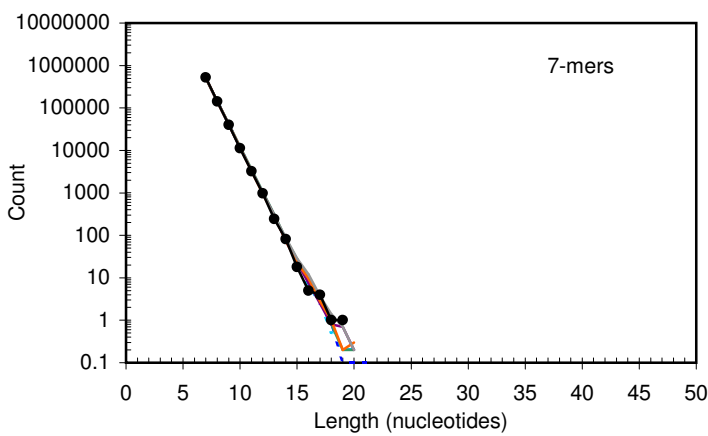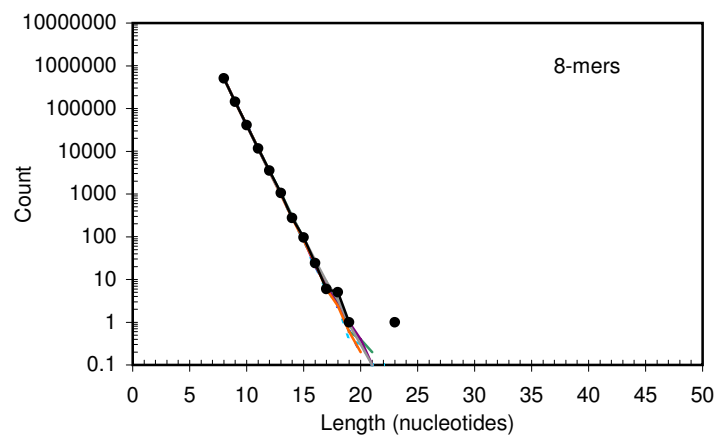

# *Mycoplasma gallisepticum* R

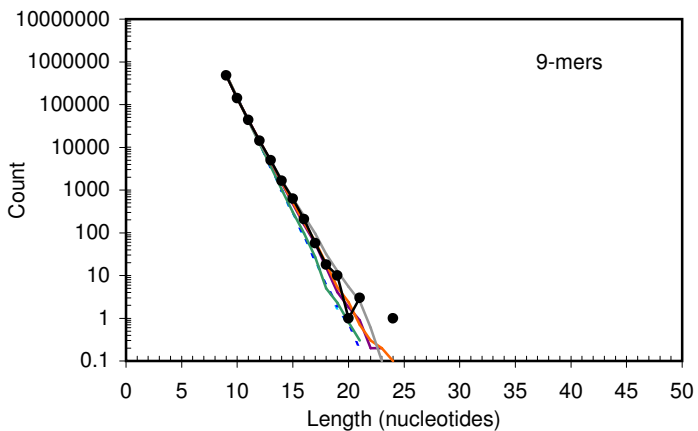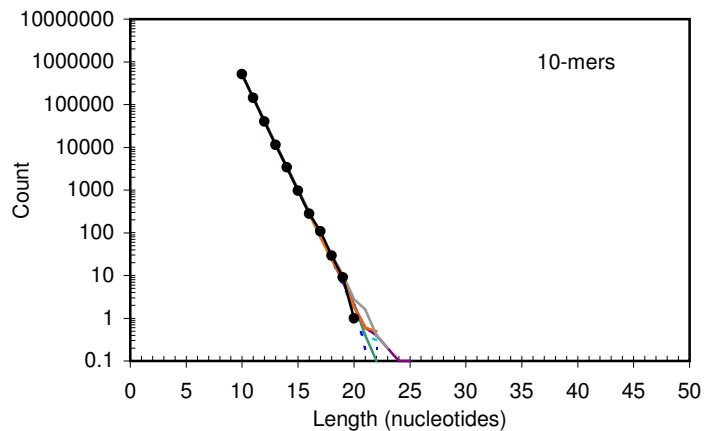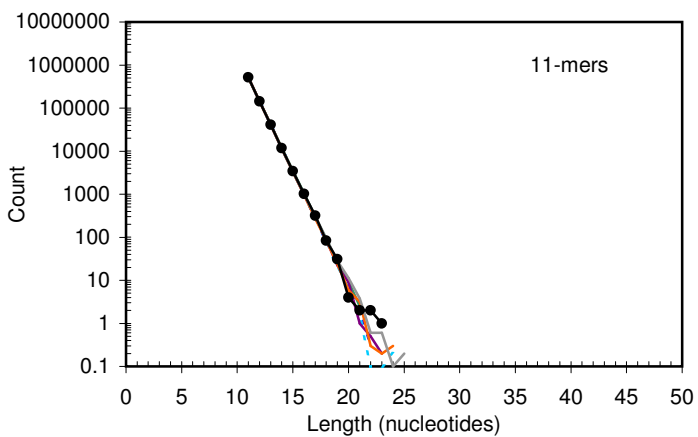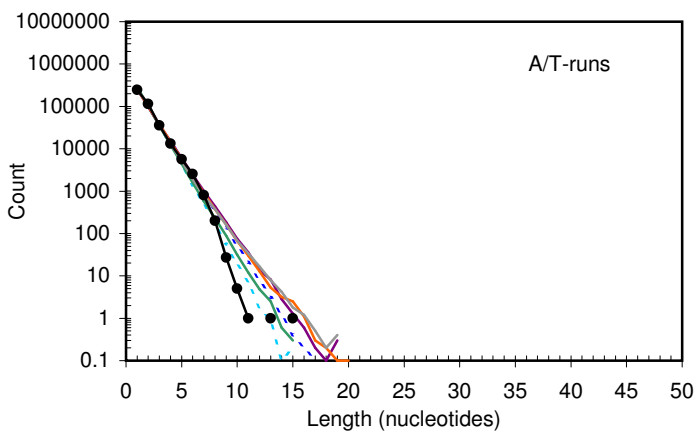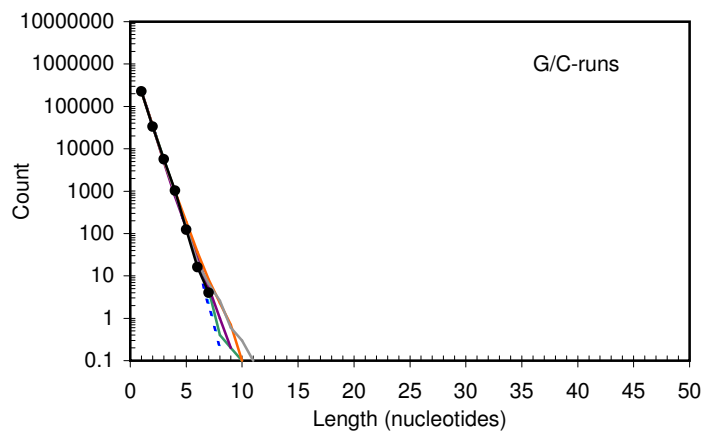

# *Mycoplasma hyopneumoniae* 232

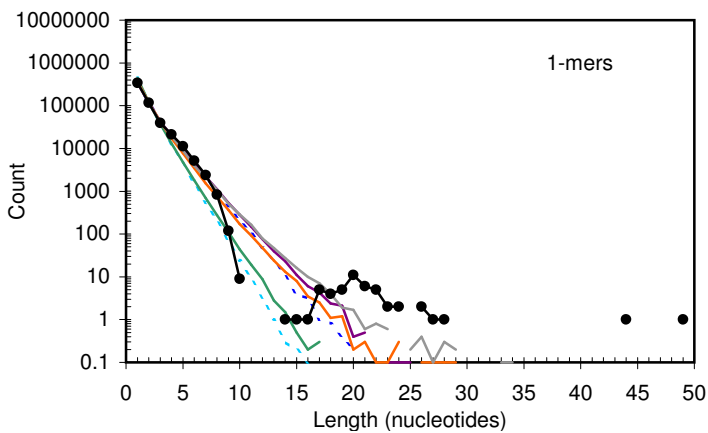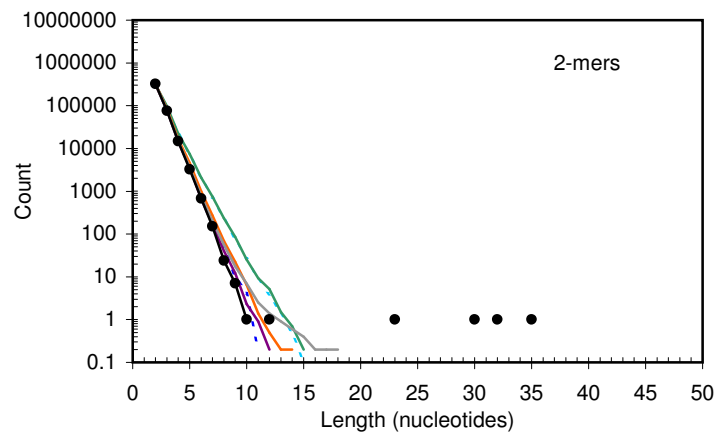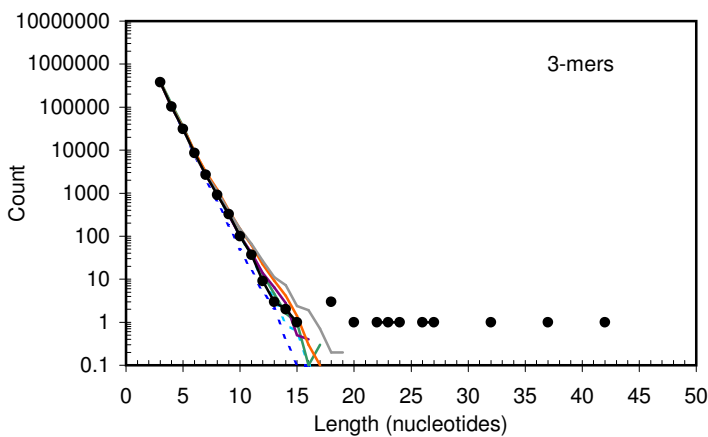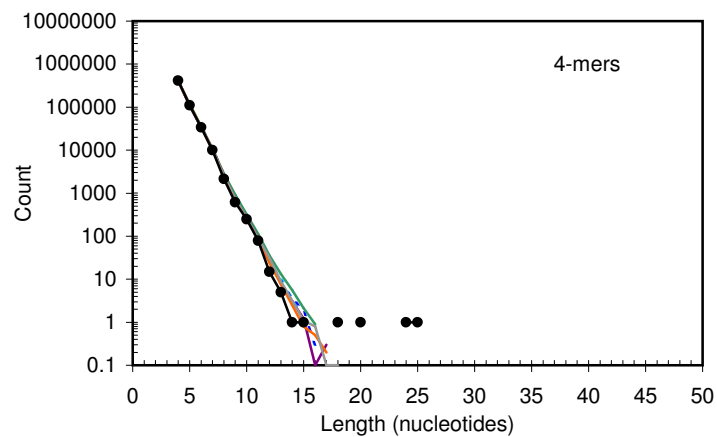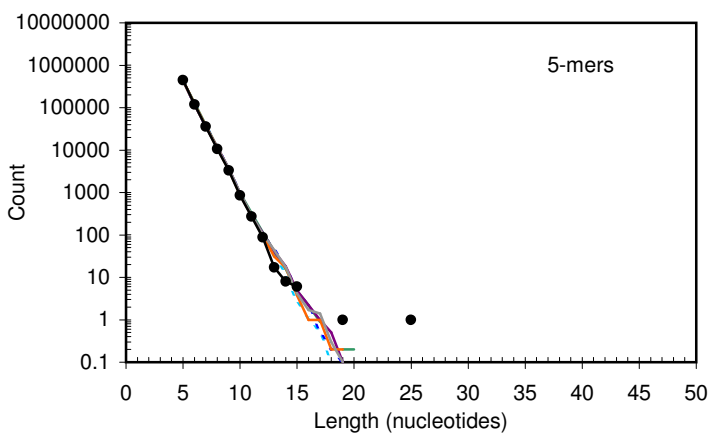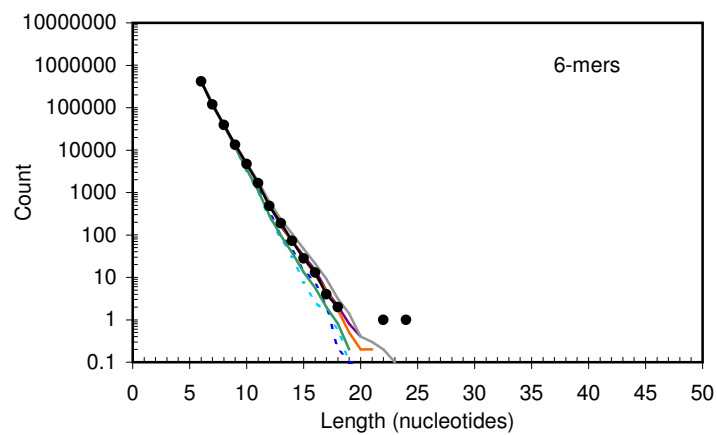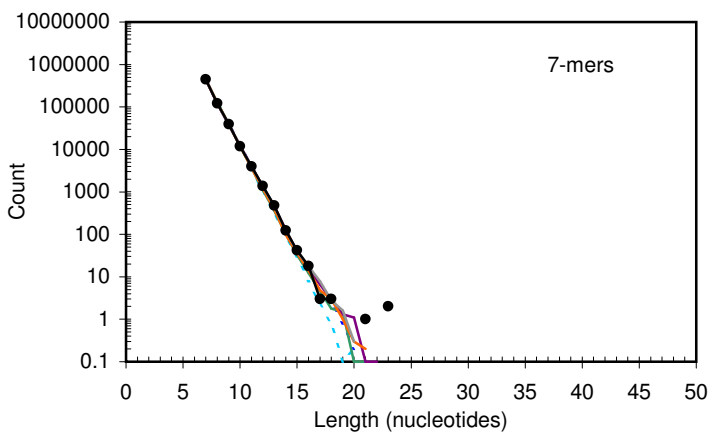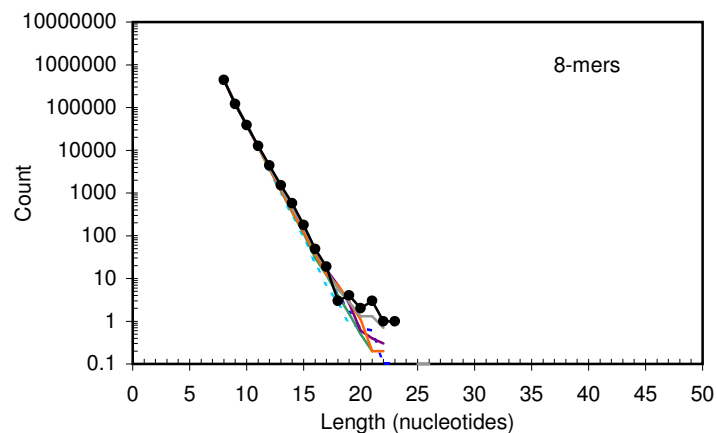

# *Mycoplasma hyopneumoniae* 232

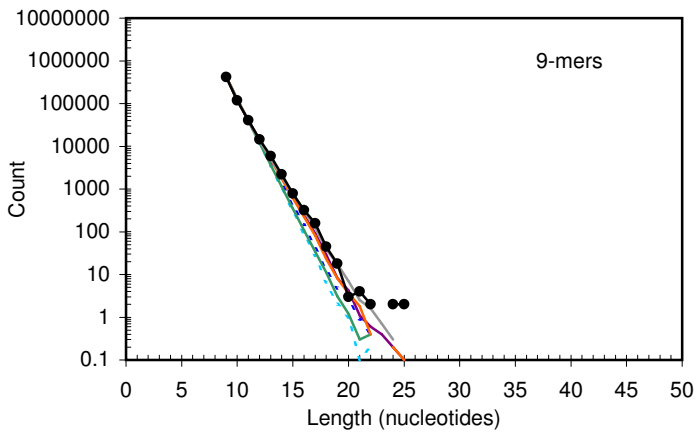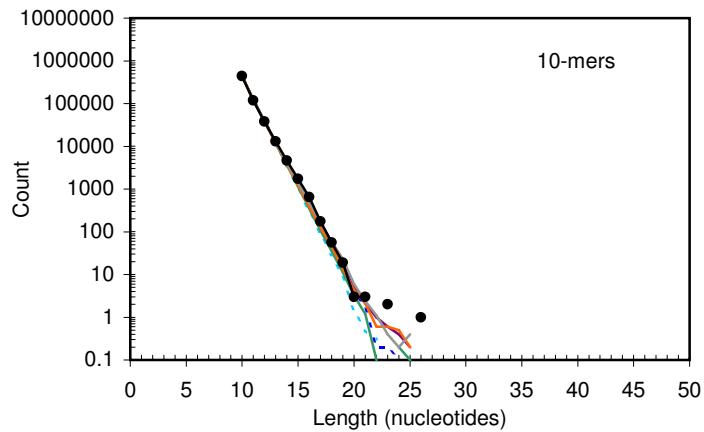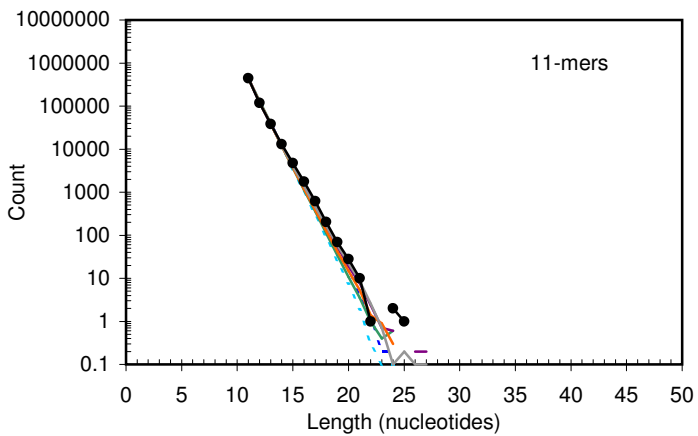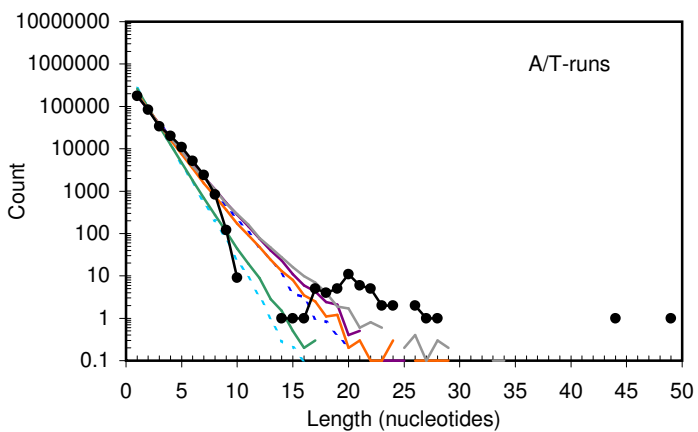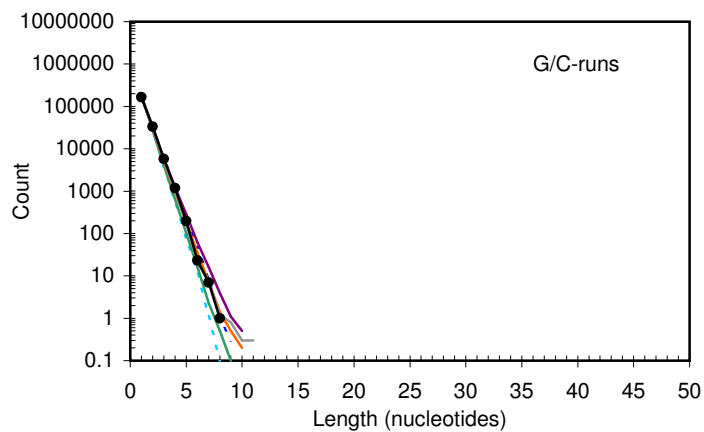



# *Nostoc sp.* PCC 7120

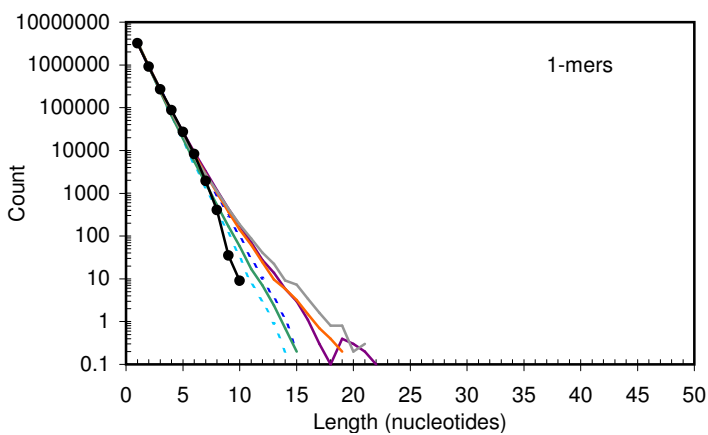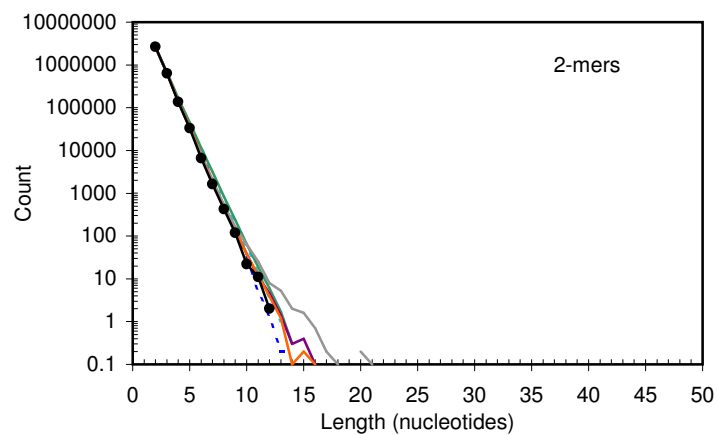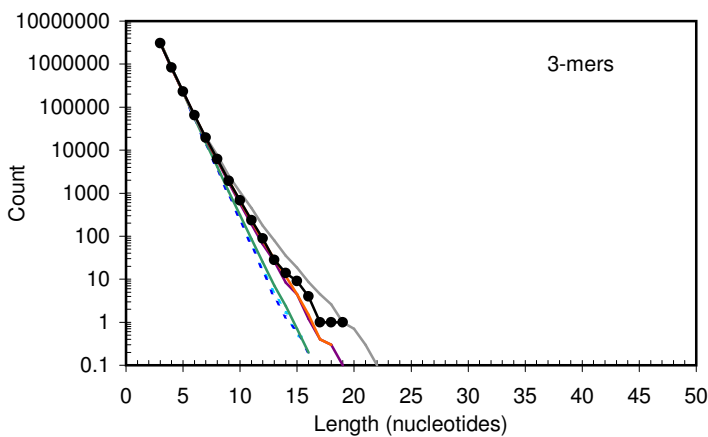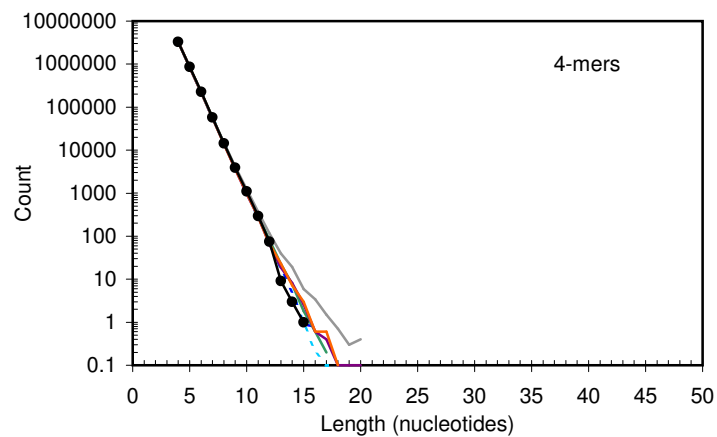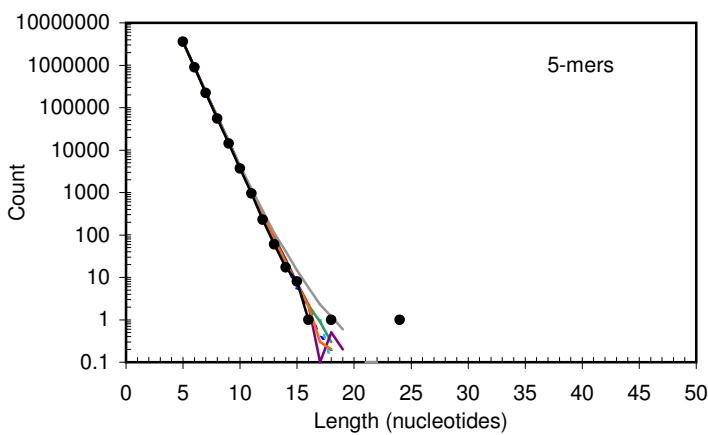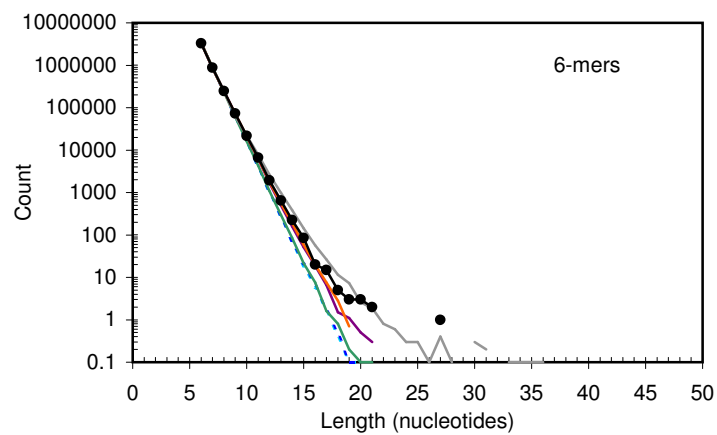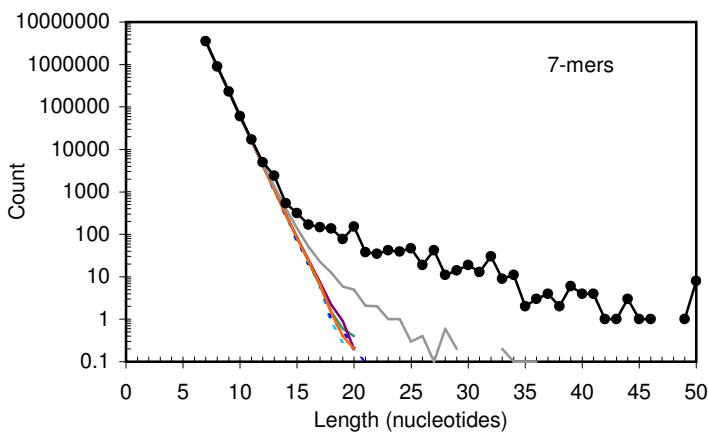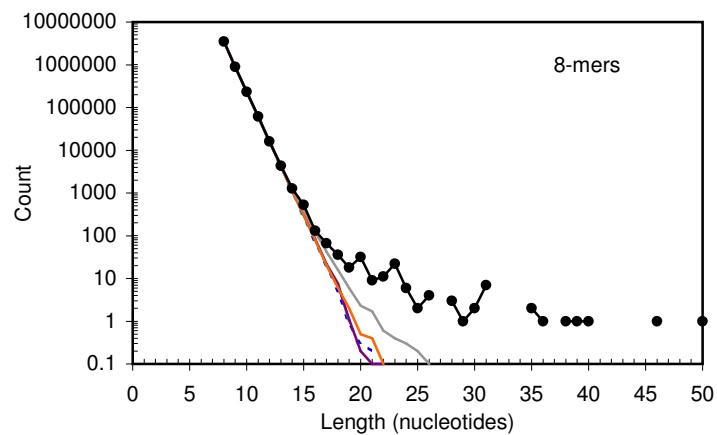

# *Nostoc sp.* PCC 7120

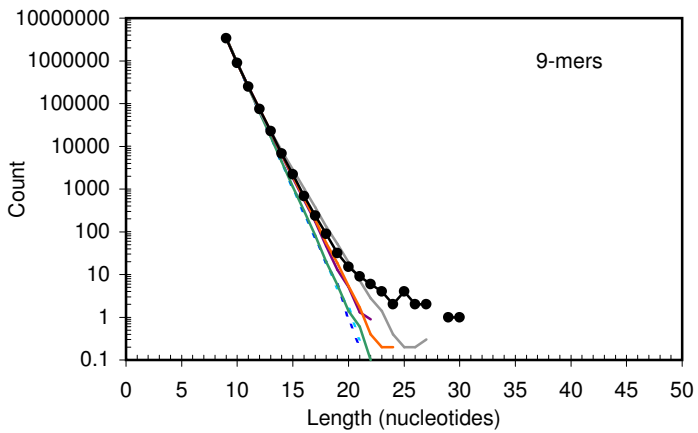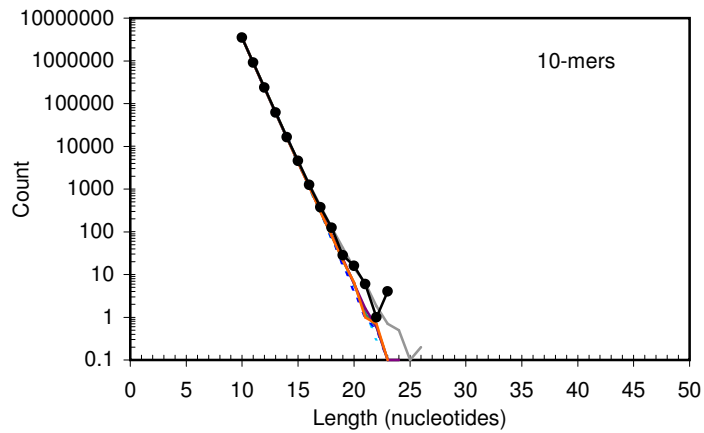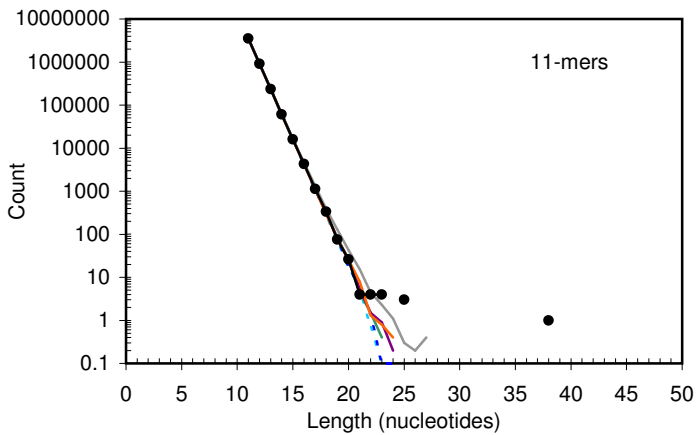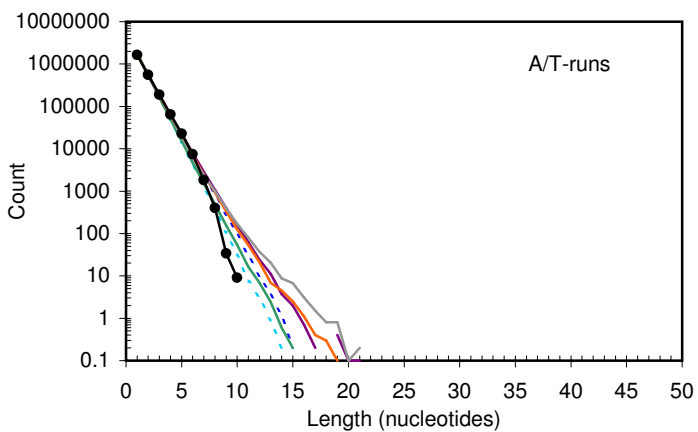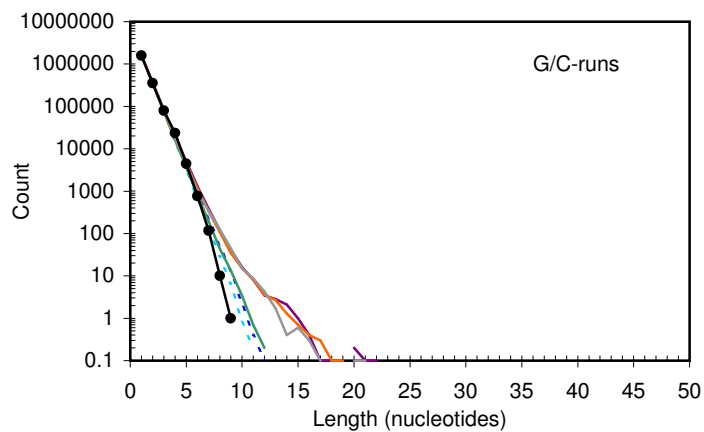

# *Polaromonas* sp. JS666

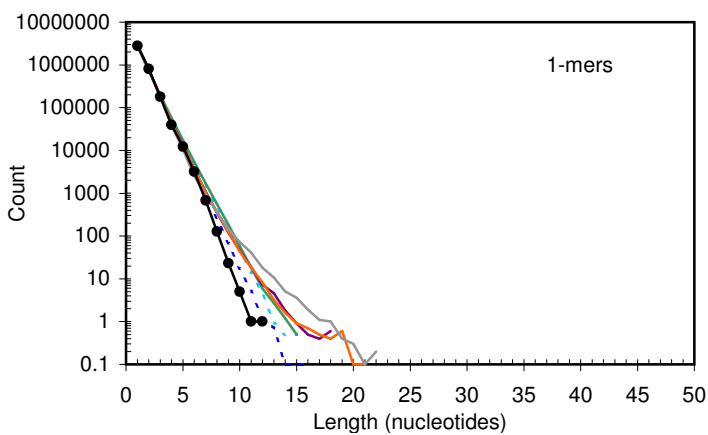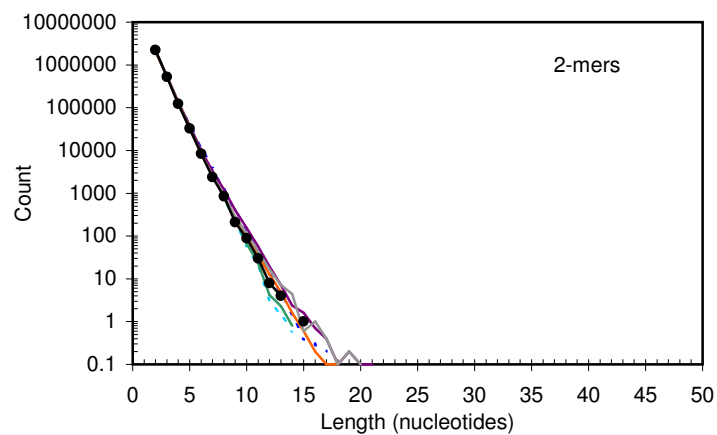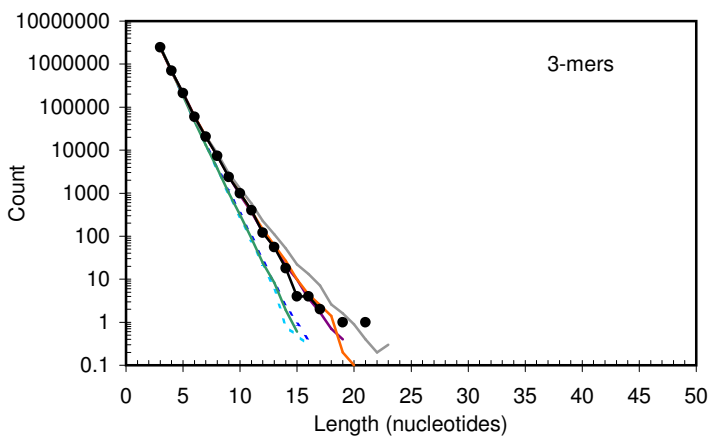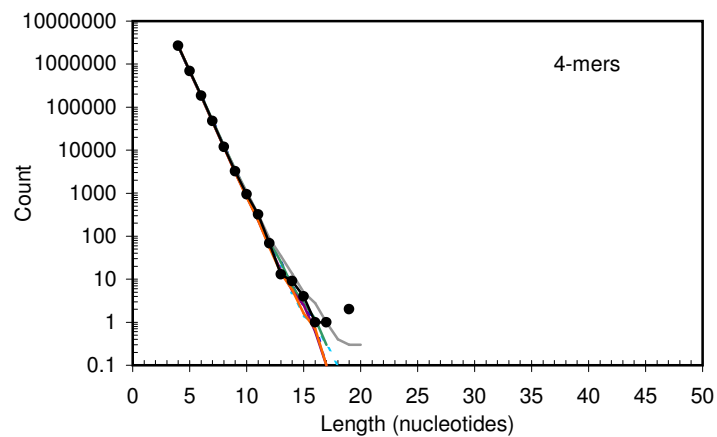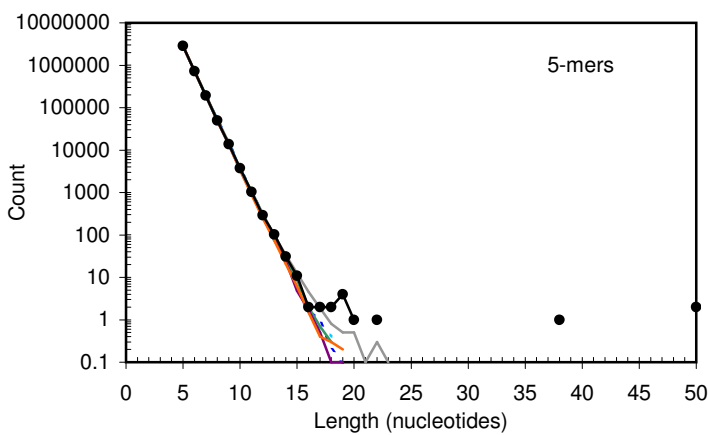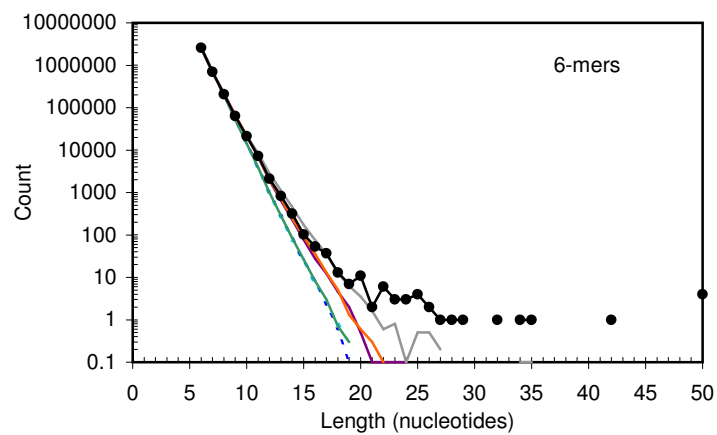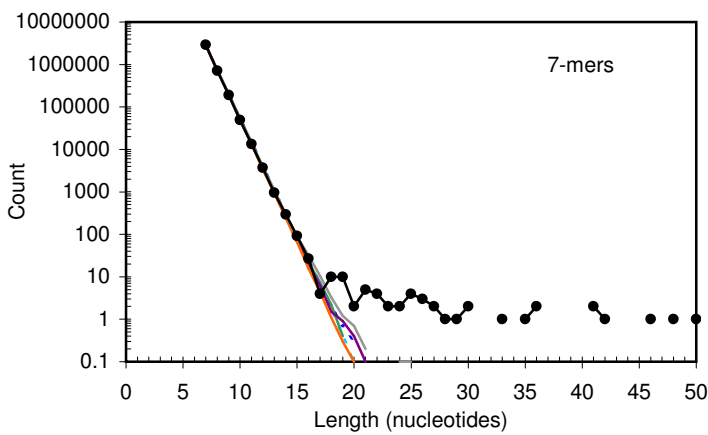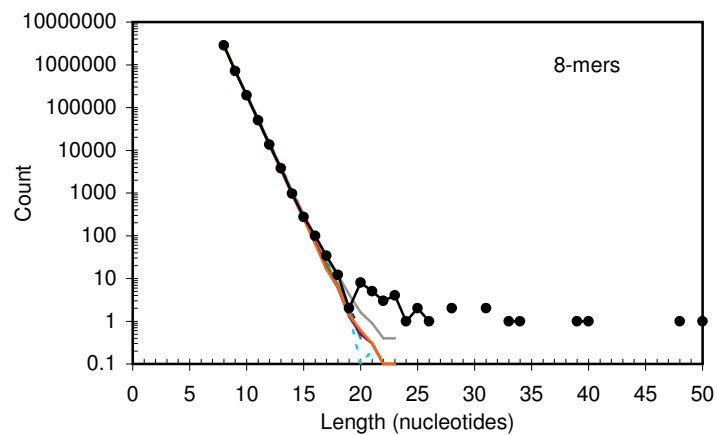

# *Polaromonas* sp. JS666

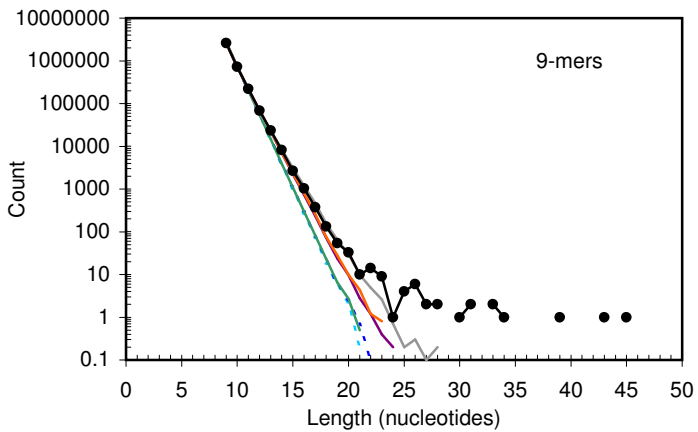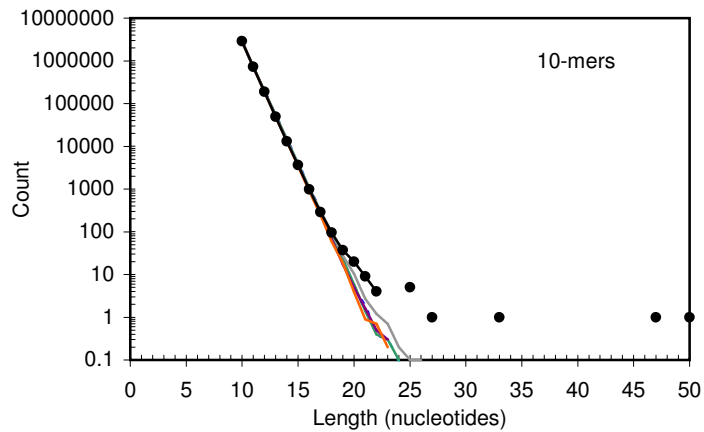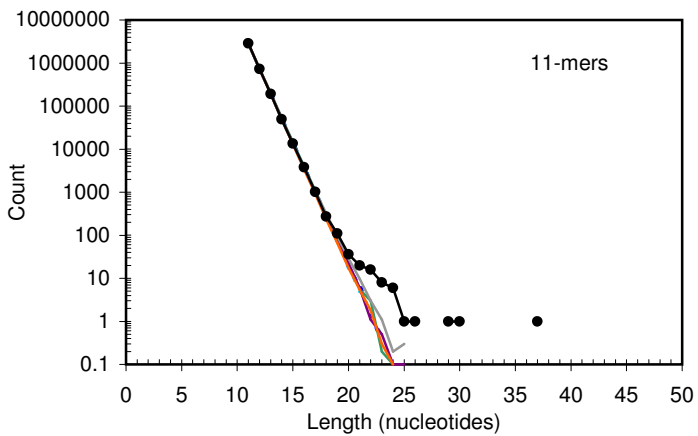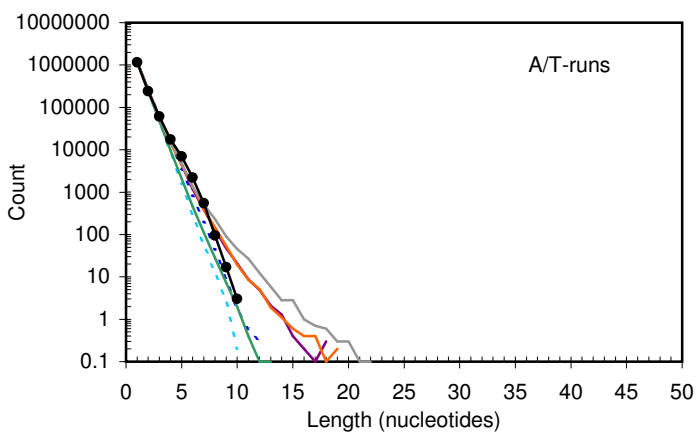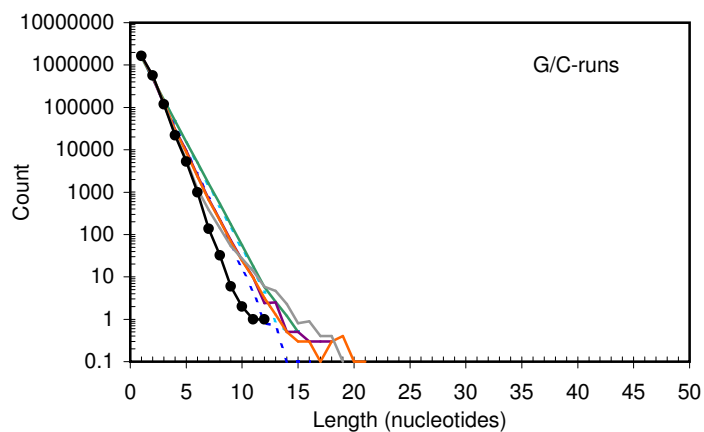

# *Streptomyces avermitilis* MA-4680

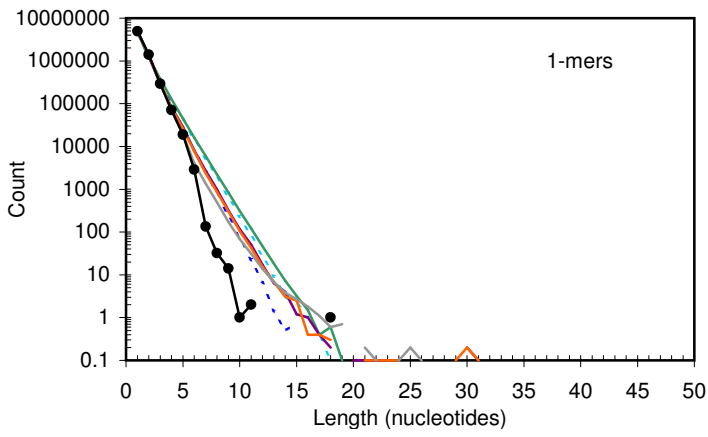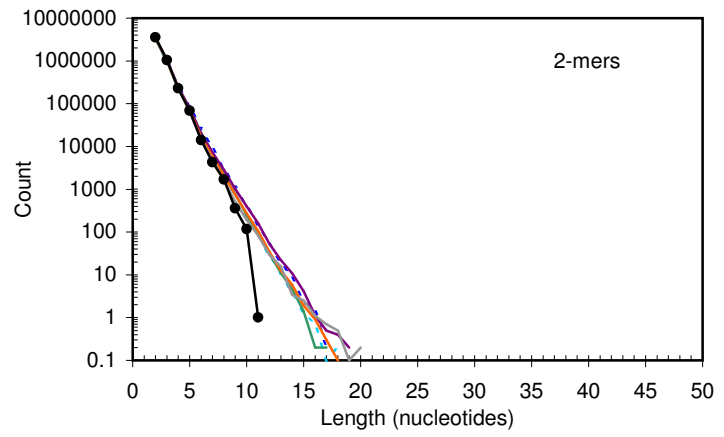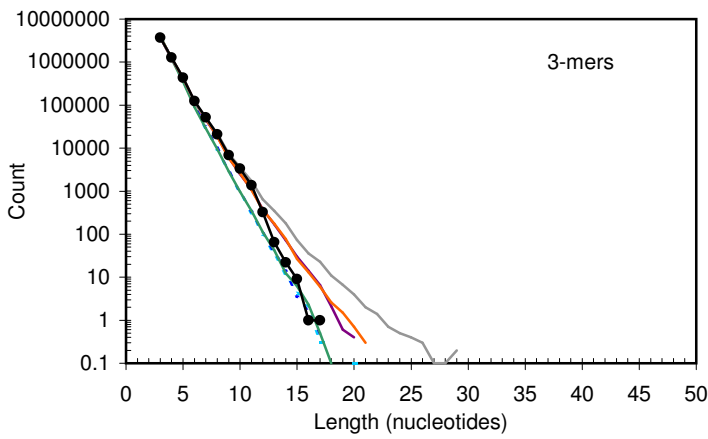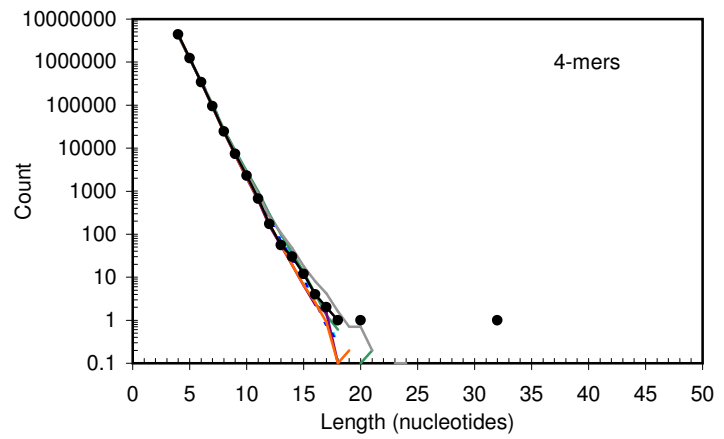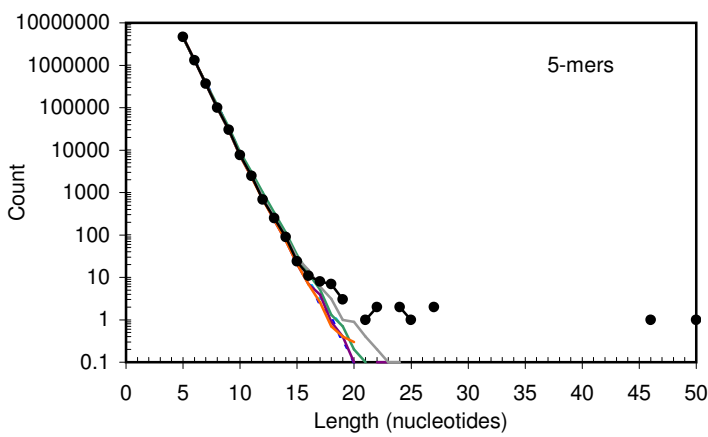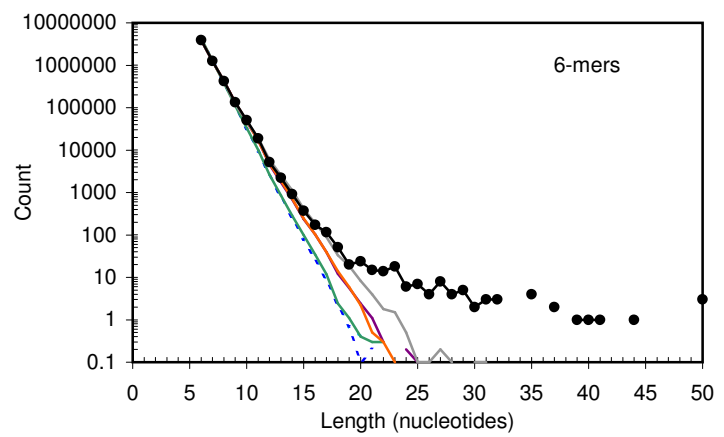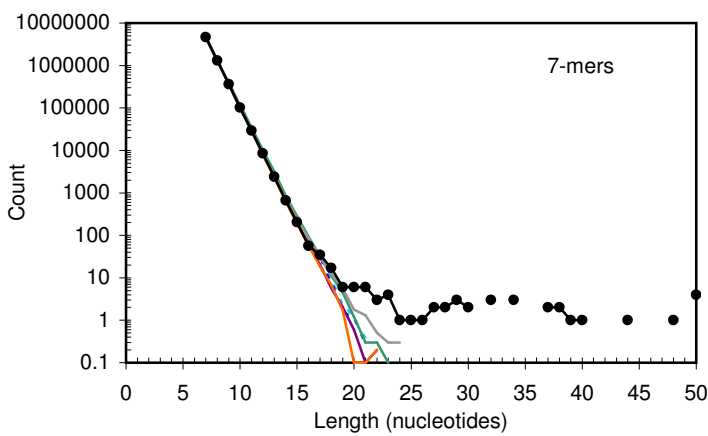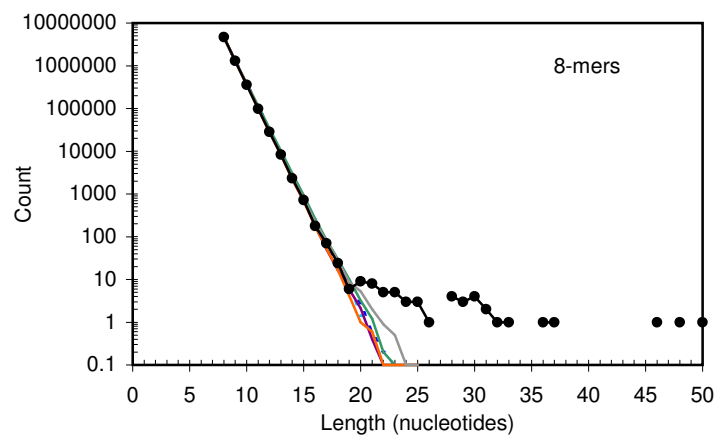

# *Streptomyces avermitilis* MA-4680

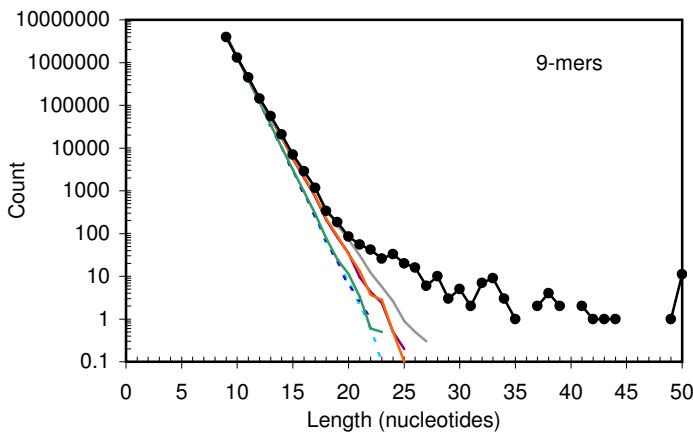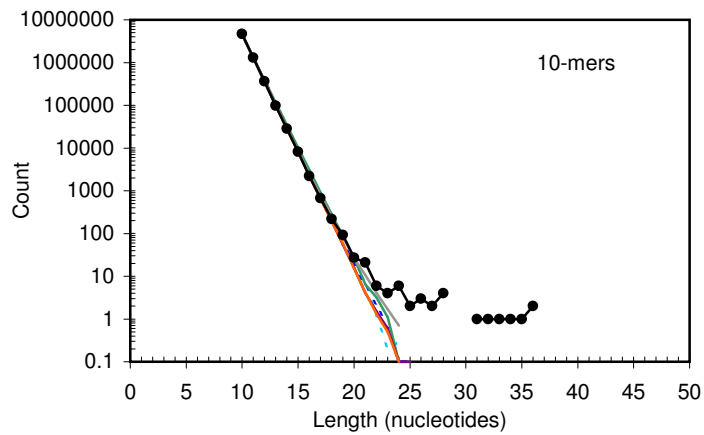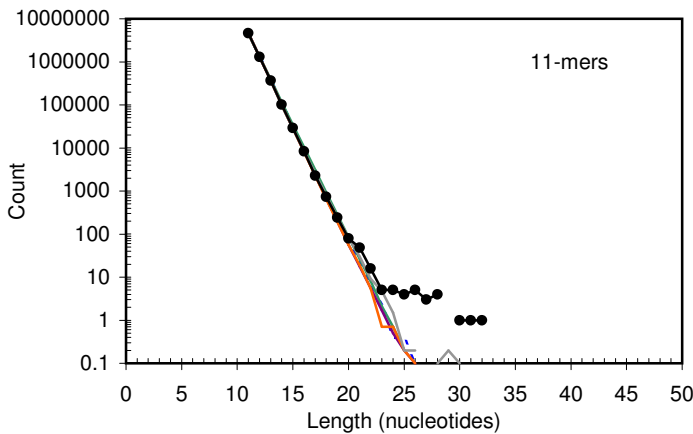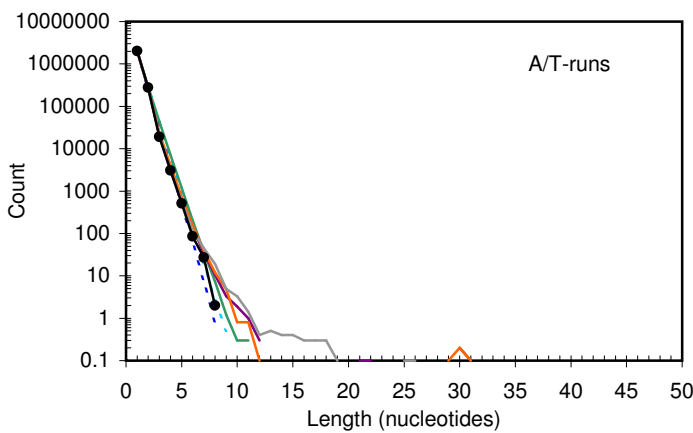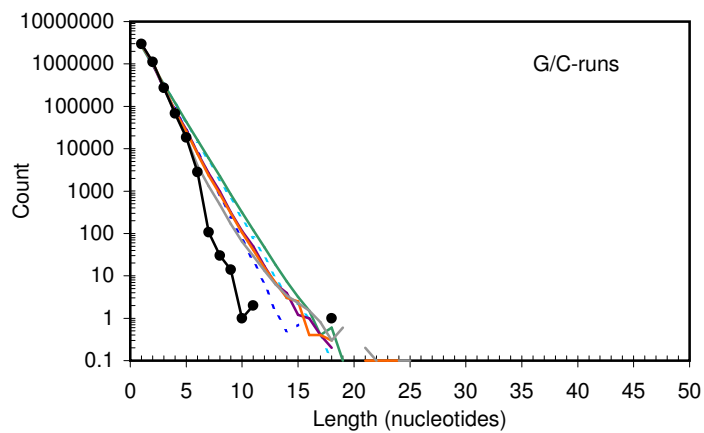

# *Streptomyces coelicolor* A32

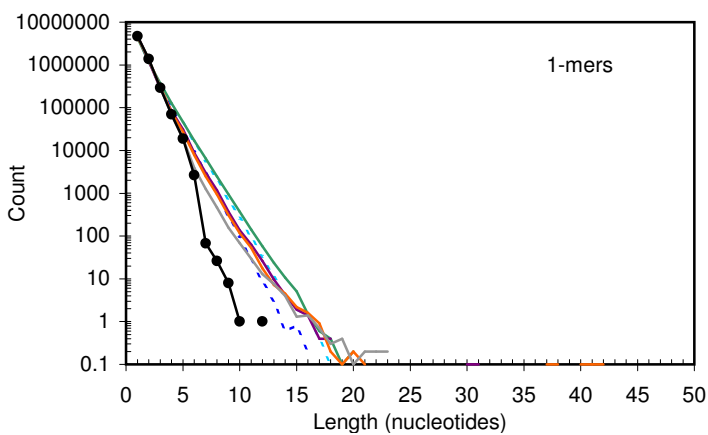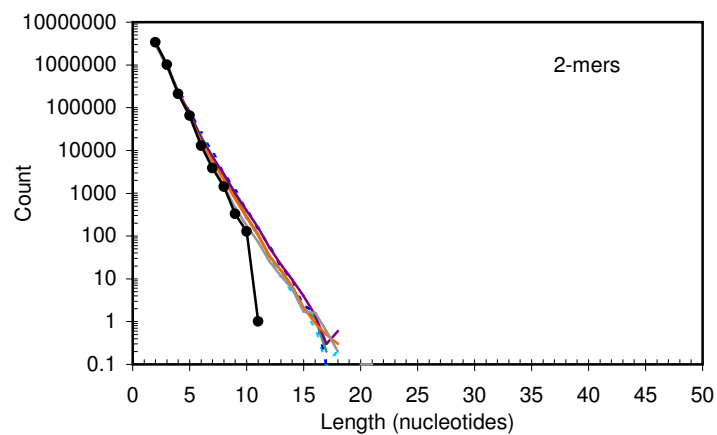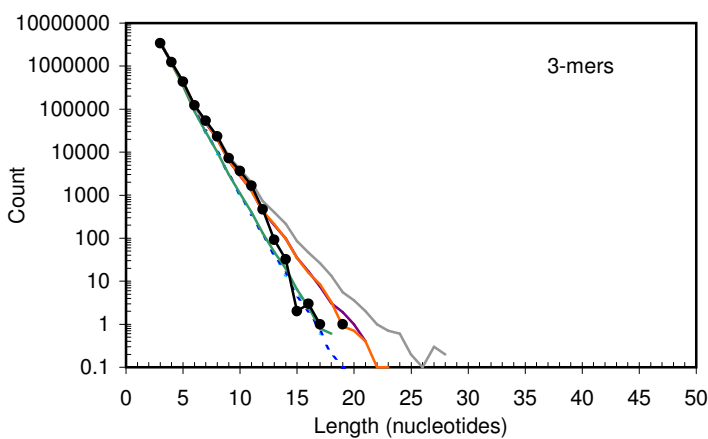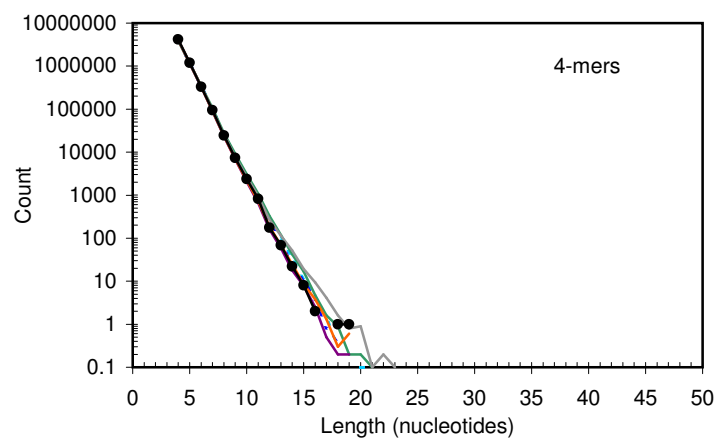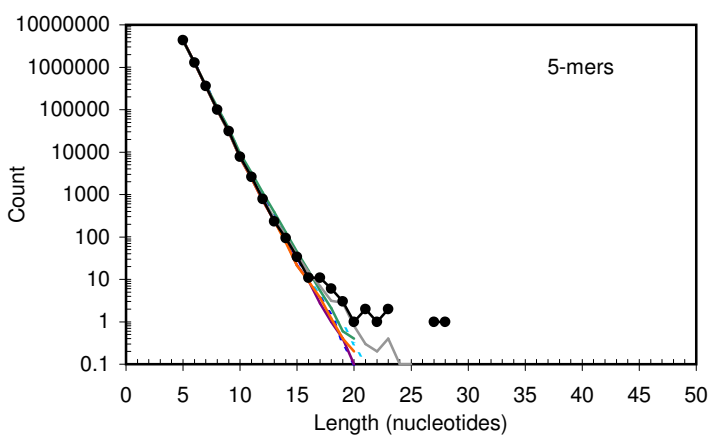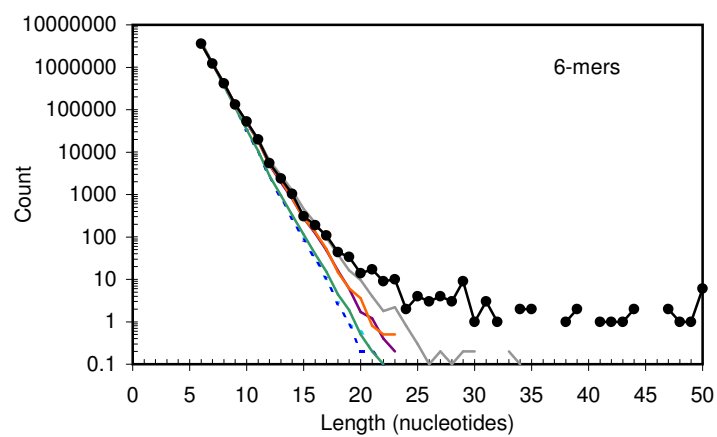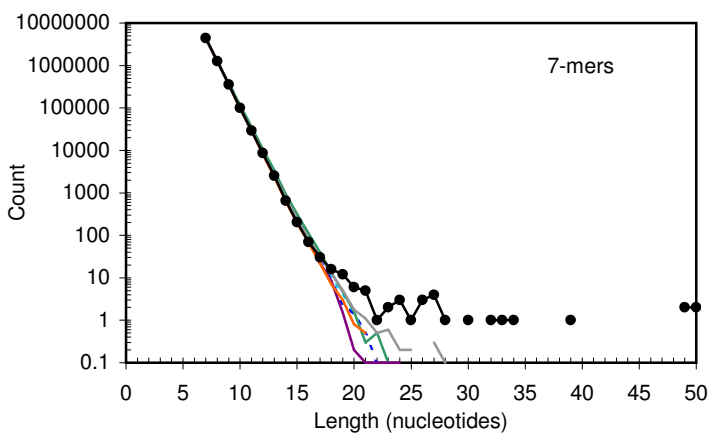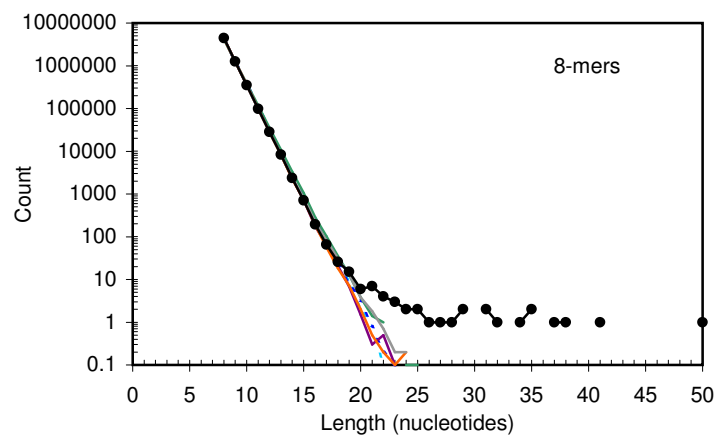

# *Streptomyces coelicolor* A32

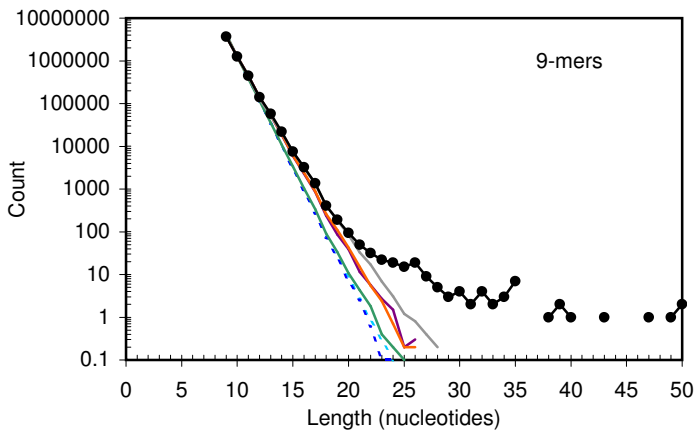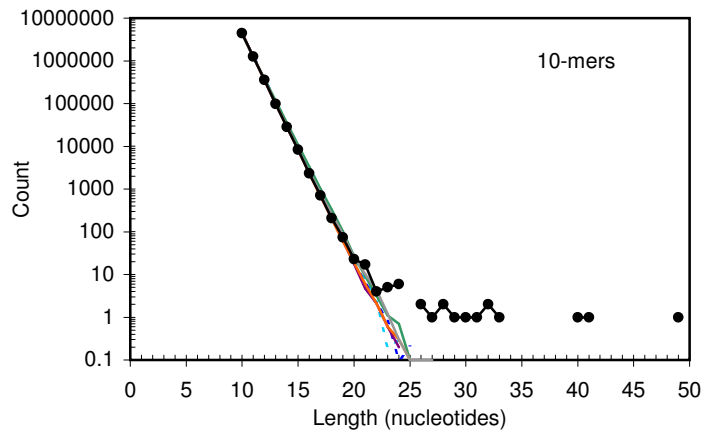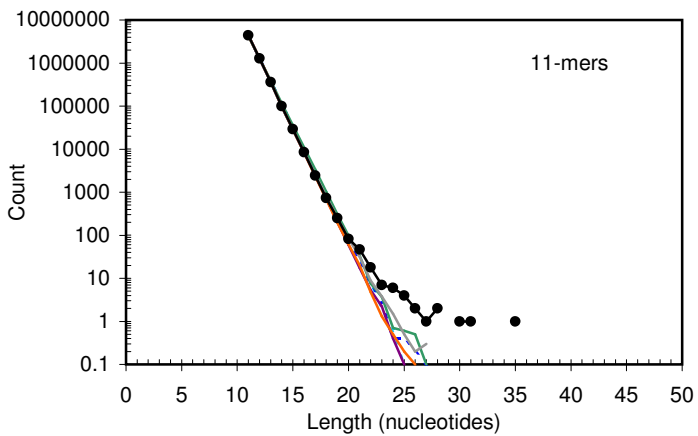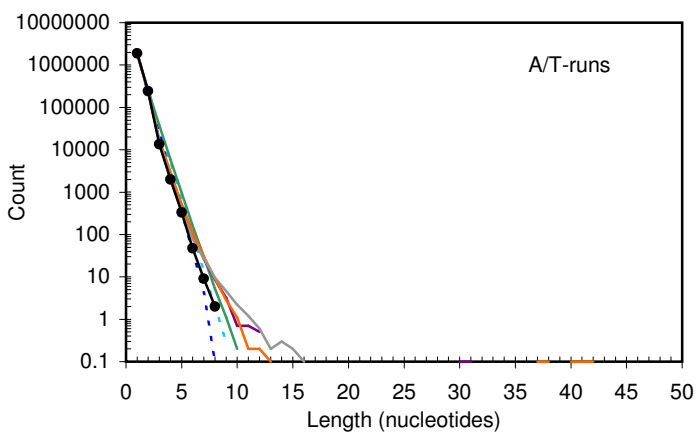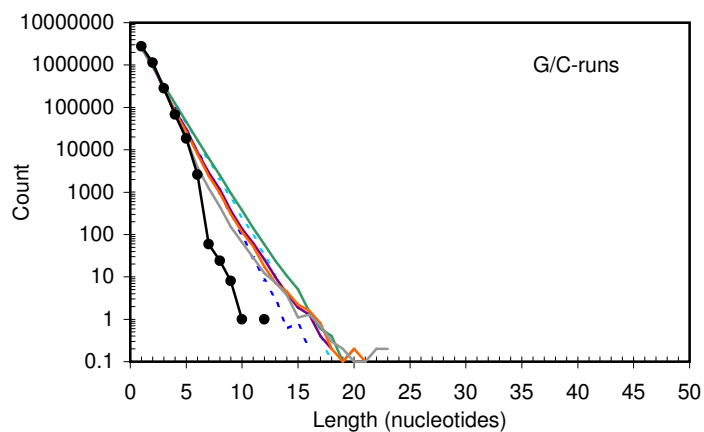



*Xanthomonas campestris* pv.  
Campestris str. 8004

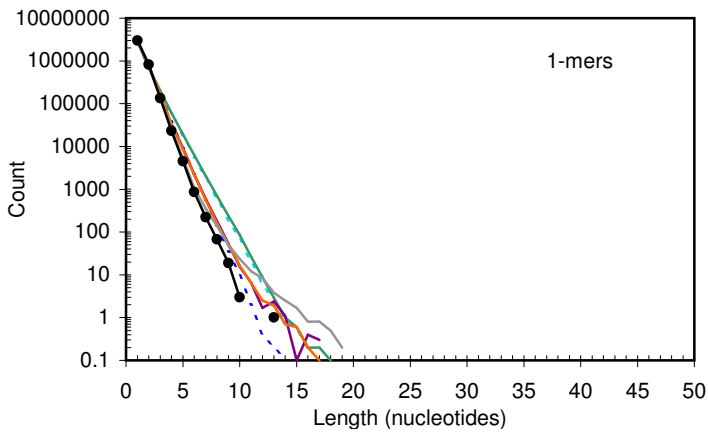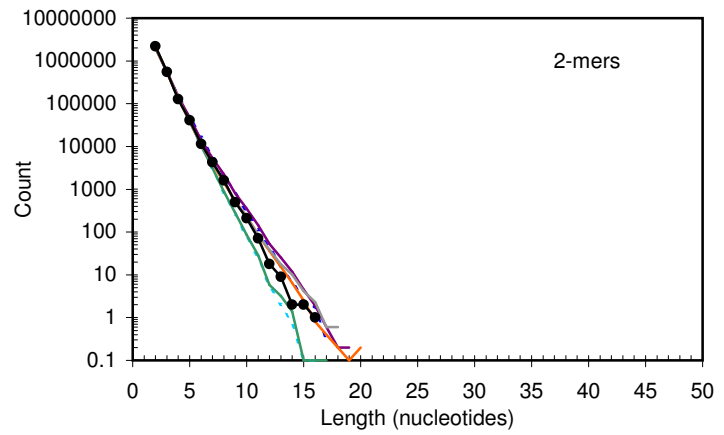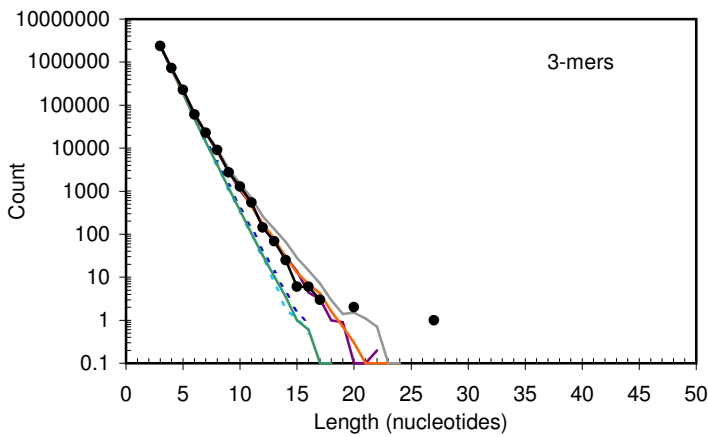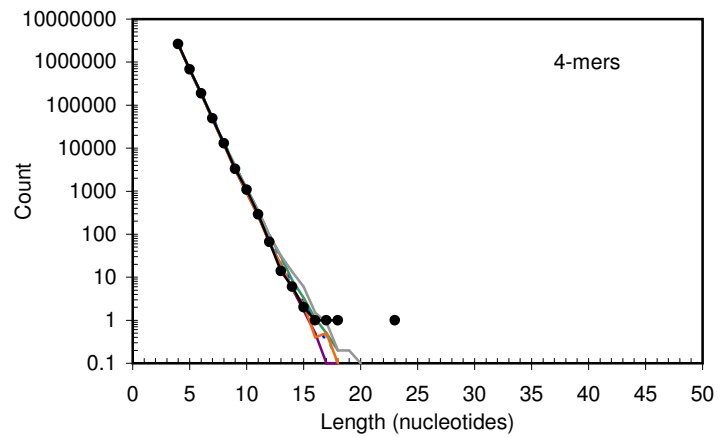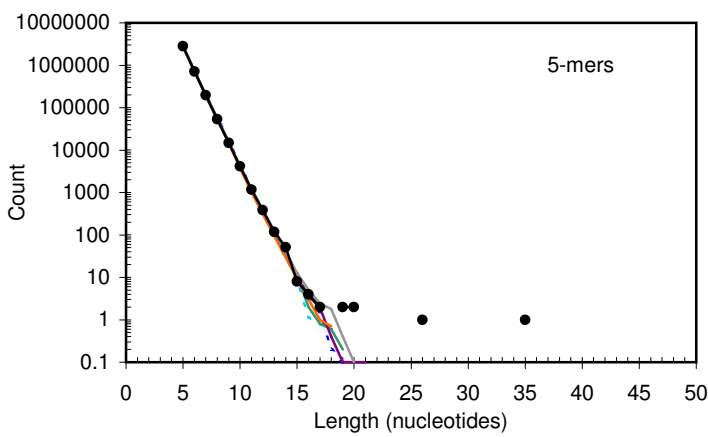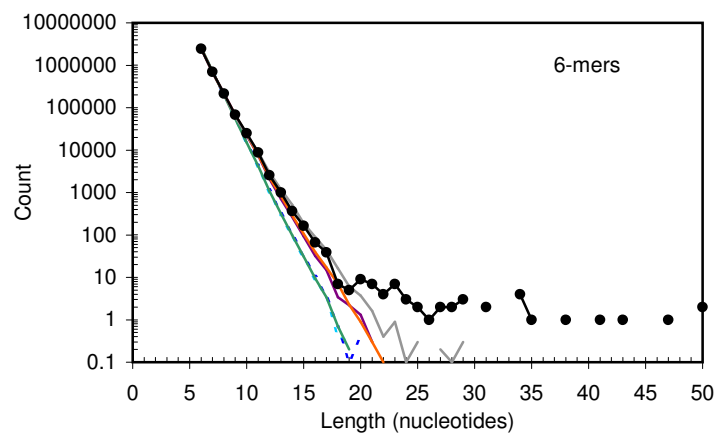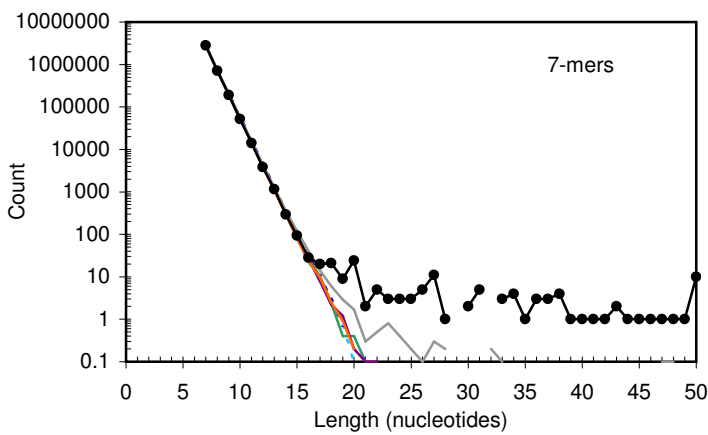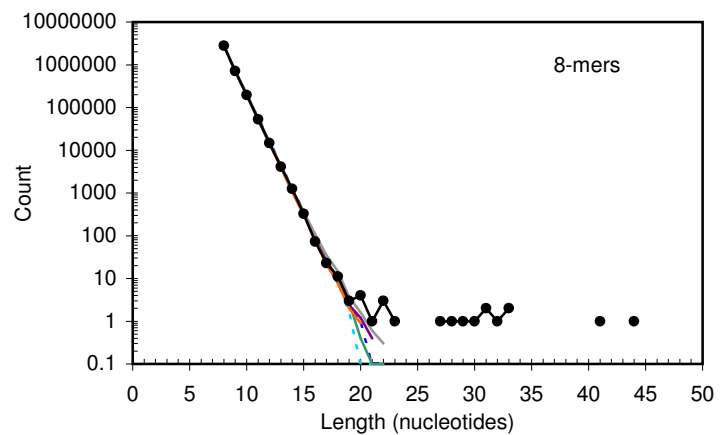

*Xanthomonas campestris* pv.  
Campestris str. 8004

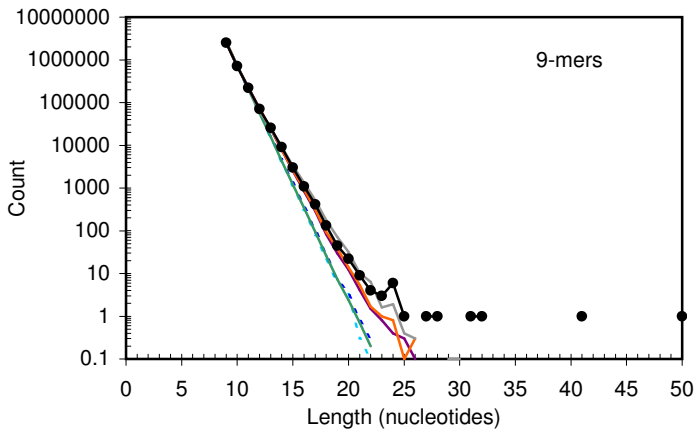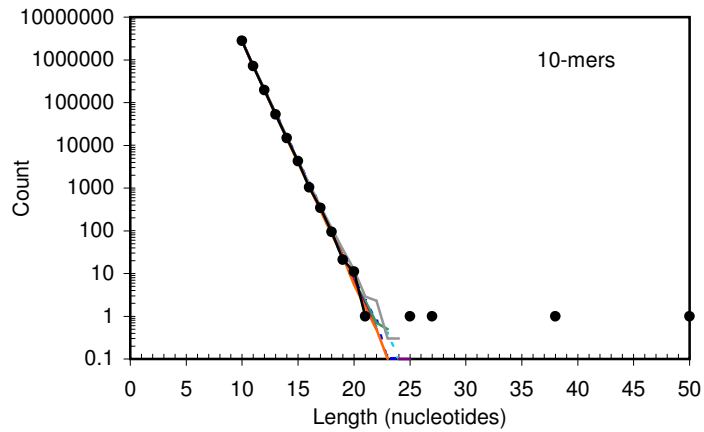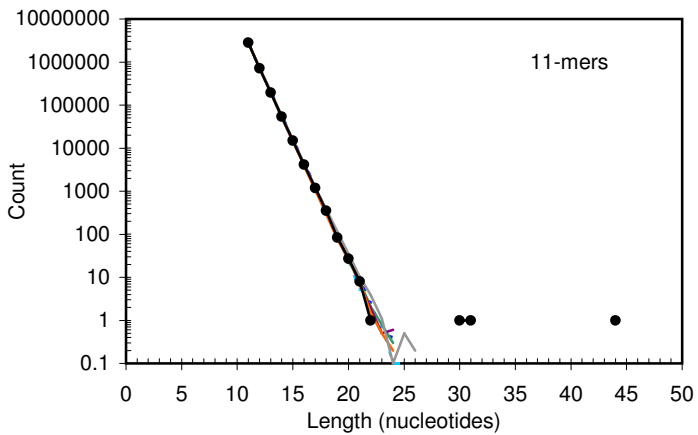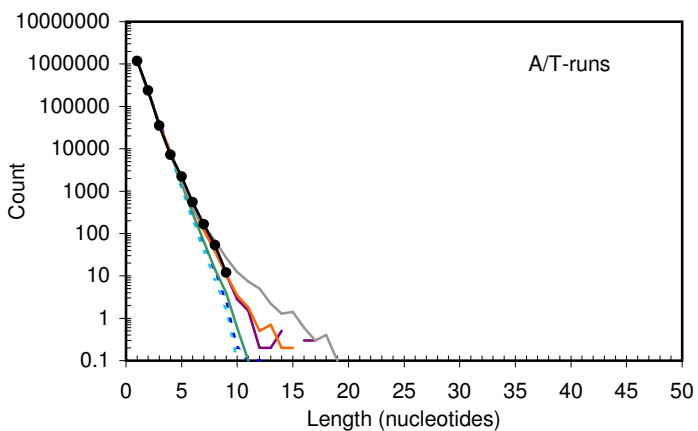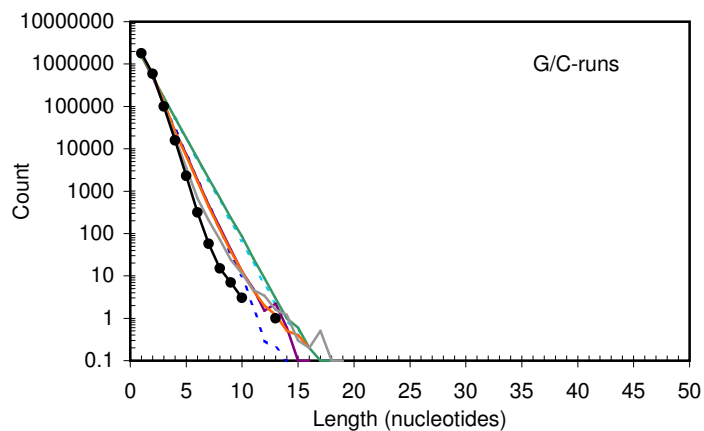

# *Xylella fastidiosa* 9a5c

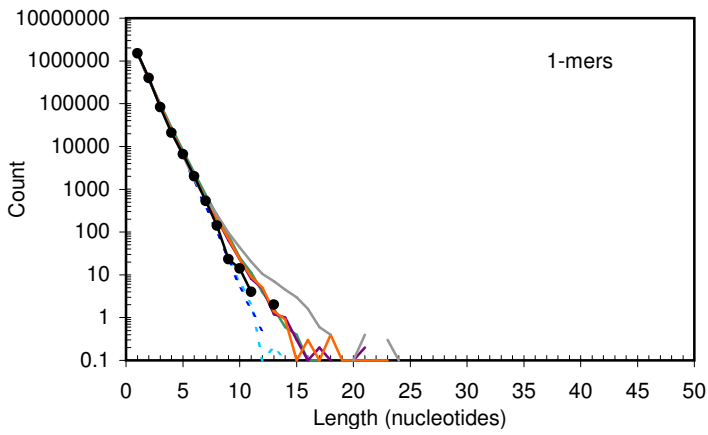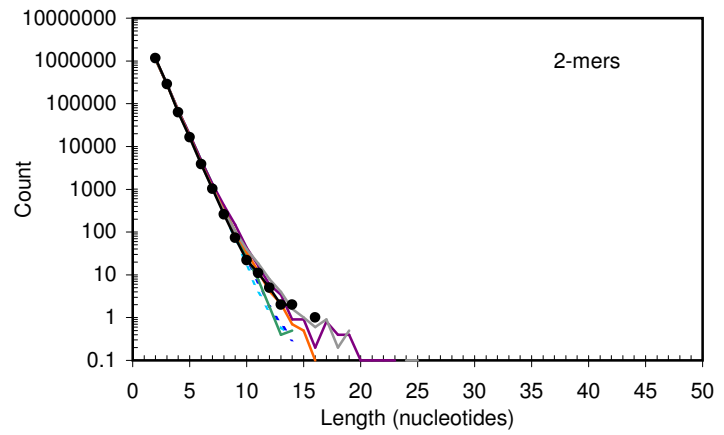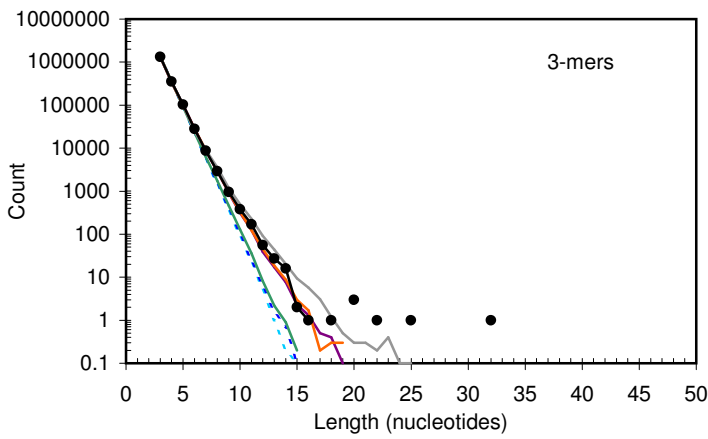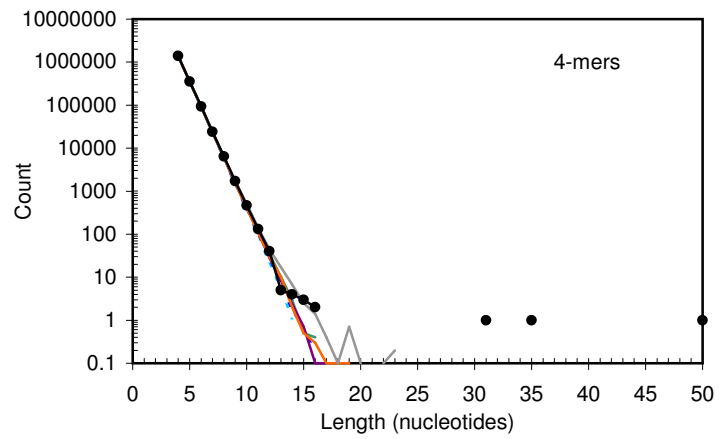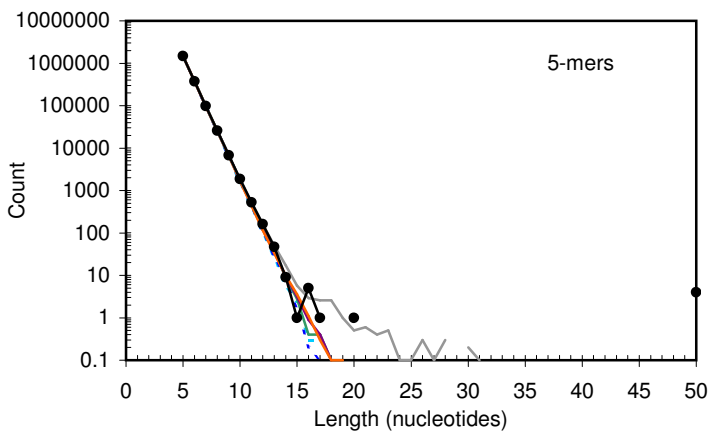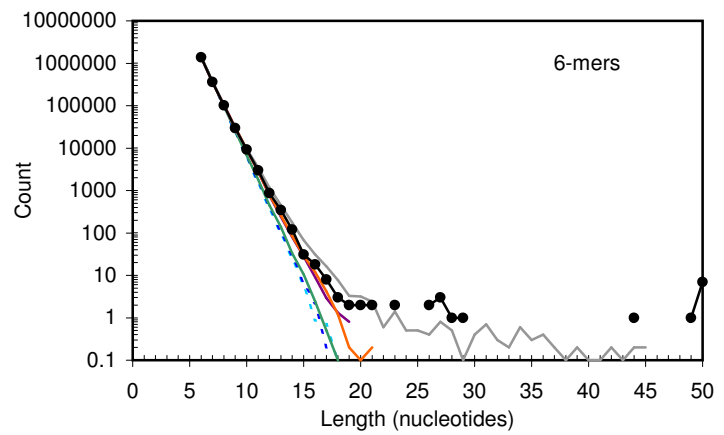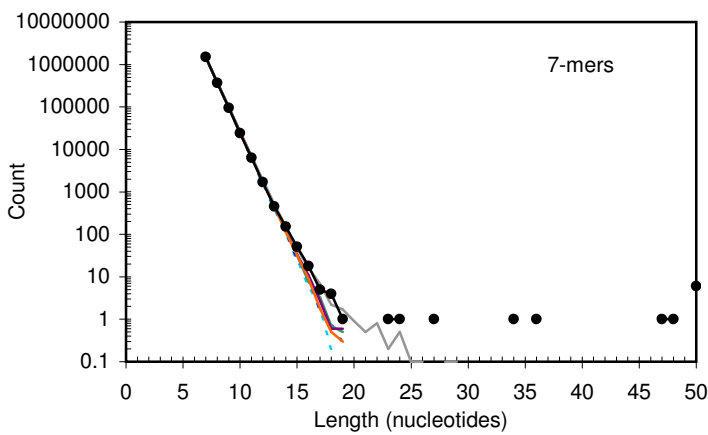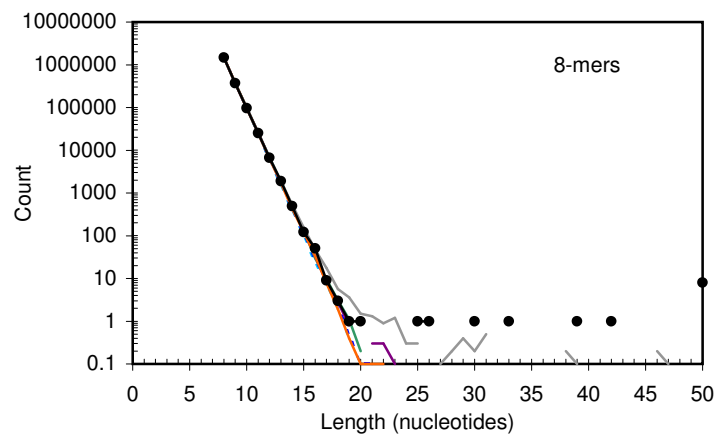

# *Xylella fastidiosa* 9a5c

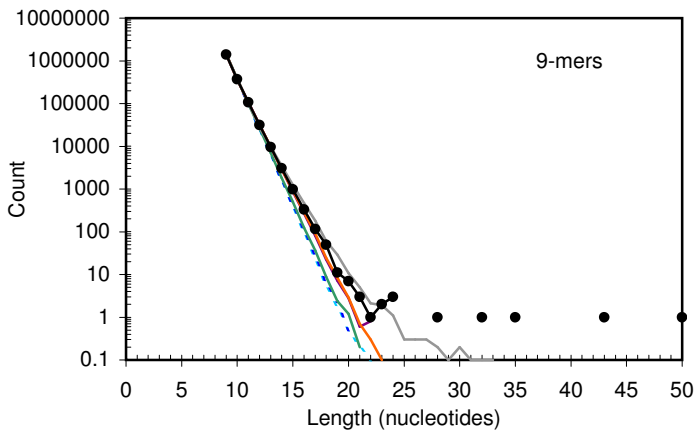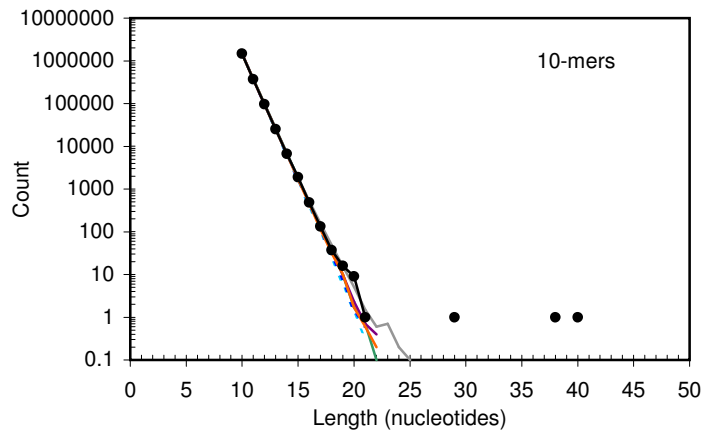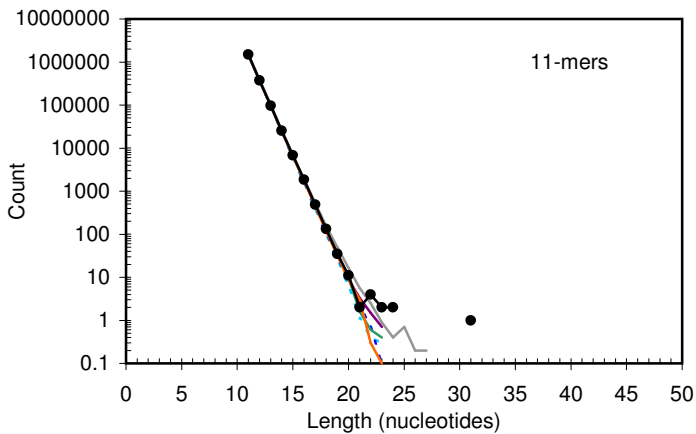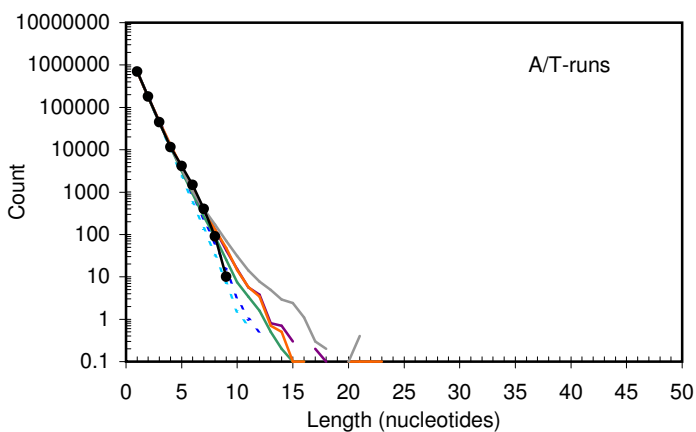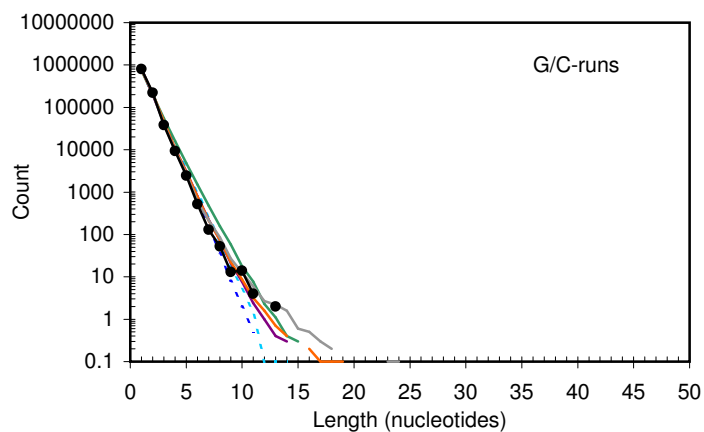

Supplement: pnas_0702412104_1.pdf [file pnas_0702412104_1.pdf]
